# Supplementary material for: Prevention and Management of High-Burden Noncommunicable Diseases in School-Age Children: A Systematic Review
Source: Oxford University Press journal article supplement (doi:10.1542/peds.2021-053852f), 2022-05-01

## Supplemental Information

| TABLE OF CONTENTS                                                                                                                                                                                                                                                                                                                                                 | PAGE      |
|-------------------------------------------------------------------------------------------------------------------------------------------------------------------------------------------------------------------------------------------------------------------------------------------------------------------------------------------------------------------|-----------|
| <b>Appendix A:</b> Expanded table of interventions and associated delivery platforms                                                                                                                                                                                                                                                                              | <b>2</b>  |
| <b>Appendix B:</b> Search strategies for each domain (OVID MEDLINE)                                                                                                                                                                                                                                                                                               | <b>3</b>  |
| <b>Appendix C:</b> Eligibility criteria                                                                                                                                                                                                                                                                                                                           | <b>15</b> |
| <b>Appendix D:</b> Included reviews                                                                                                                                                                                                                                                                                                                               | <b>16</b> |
| <b>Appendix E:</b> Excluded reviews                                                                                                                                                                                                                                                                                                                               | <b>19</b> |
| <b>Appendix F:</b> Prisma flow diagrams (9)                                                                                                                                                                                                                                                                                                                       | <b>64</b> |
| <b>Appendix G:</b> Forest plots by condition, demonstrating effectiveness of interventions on select outcomes. <ul style="list-style-type: none"> <li>- <i>Supplementary Figure 1. Pulmonary Function (SMD)</i></li> <li>- <i>Supplementary Figure 2. Forced Expiratory Volume (MD)</i></li> <li>- <i>Supplementary Figure 3. Percent Change HbA1c</i></li> </ul> | <b>73</b> |

## Appendix A: Expanded table of intervention types and associated delivery platforms of conditions and interventions aimed to be included in this review.

| Condition/Risk Factors                                      | Intervention                                                                                                                                                           | Facility-based | Community-based | School-based | Family-based |
|-------------------------------------------------------------|------------------------------------------------------------------------------------------------------------------------------------------------------------------------|----------------|-----------------|--------------|--------------|
| <b>Asthma</b>                                               | Improve medication related behavior (adherence, inhaler technique), use of bronchodilators or inhaled corticosteroids                                                  | √              | √               | √            | √            |
|                                                             | Improve residential environment (reduce housing damp/mold, improve indoor air quality)                                                                                 |                | √               | √            | √            |
| <b>Diabetes Type 1 (Insulin-independent diabetes)</b>       | Medical management, Self-monitoring of blood glucose levels, reminders for self-administration of Insulin                                                              | √              | √               |              | √            |
|                                                             | Public awareness to promote awareness and earlier diagnosis                                                                                                            | √              | √               | √            | √            |
|                                                             | Educational and psychosocial interventions                                                                                                                             | √              | √               | √            | √            |
| <b>Rheumatic heart disease</b>                              | Primary prevention of rheumatic fever- Penicillin for streptococcal pharyngitis                                                                                        | √              | √               |              |              |
|                                                             | Prevention of rheumatic heart disease (heart valve damage)- with use of antibiotics                                                                                    | √              | √               |              |              |
|                                                             | Surgical repair for heart valve damage                                                                                                                                 | √              |                 |              |              |
| <b>Sickle Cell Disease</b>                                  | Reducing the rate of vaso-occlusive crises with medical management and education (e.g. Hydroxyurea, adequate hydration)                                                | √              | √               |              |              |
|                                                             | Prophylaxis for infection, enrollment in comprehensive care, and stroke prevention                                                                                     | √              | √               |              |              |
|                                                             | Prophylaxis for infection, pneumococcal vaccines, oral penicillin, use of insecticide treated bed nets, and anti-malarial therapy.                                     | √              | √               |              |              |
| <b>Childhood cancer</b>                                     | Prompt and correct diagnosis followed by effective therapy                                                                                                             | √              |                 |              |              |
|                                                             | Pediatric cancer care plan at diagnosis                                                                                                                                | √              |                 |              |              |
|                                                             | Palliative care and pain management aimed at reducing disease symptoms                                                                                                 | √              | √               |              |              |
| <b>Epilepsy</b>                                             | Medical management plans aimed at reducing risk of epileptic seizures                                                                                                  | √              |                 |              |              |
|                                                             | Education and management of triggers and behaviours to reduce the risk of epileptic seizure (e.g. Consistent sleep routines, adequate diet, relaxation techniques      | √              | √               | √            | √            |
|                                                             | Public health interventions addressing maternal and child health care, immunizations, public sanitation, brain injury prevention, and stroke prevention                | √              | √               | √            | √            |
| <b>Indoor air pollution (pollution, smoke, dust)</b>        | Programs aimed at parental behaviour to eliminate children's exposure to second-hand smoke                                                                             | √              | √               | √            | √            |
|                                                             | Educational and supportive programs aimed at improving home air quality (e.g. improvement of stoves, air filters, uptake of smoke alarms)                              |                | √               | √            | √            |
| <b>Outdoor air pollution (pollution, pollens and molds)</b> | Environmental awareness interventions- Reducing ambient particulate matter air pollution                                                                               |                | √               | √            | √            |
|                                                             | Educational programs for preventive measures and reducing exposure during heavy air pollution episodes (e.g. avoiding vigorous, extended outdoor activity, face masks) |                | √               | √            | √            |
| <b>Environmental contaminants (e.g. lead exposure)</b>      | Preventive measures reducing exposure, elimination of lead-based products in homes                                                                                     | √              | √               | √            | √            |

**Appendix B: Search strategies for each condition (OVID MEDLINE)****ASTHMA**

| Category     | #  | Term                                                                             |
|--------------|----|----------------------------------------------------------------------------------|
| Age          | 1  | exp child/                                                                       |
|              | 2  | children*.mp.                                                                    |
|              | 3  | child*.mp.                                                                       |
|              | 4  | (schoolchild* or school child*).mp.                                              |
|              | 5  | adolescen*.mp.                                                                   |
|              | 6  | teen*.mp.                                                                        |
|              | 7  | pubescen*.mp.                                                                    |
|              | 8  | school.mp.                                                                       |
|              | 9  | school-age.mp.                                                                   |
|              | 10 | 1 OR 2 OR 3 OR 4 OR 5 OR 6 OR 7 OR 8 OR 9                                        |
|              | 11 | Limit 10 to systematic reviews                                                   |
|              | 12 | Limit 11 to 2000-current                                                         |
| Condition    | 13 | exp Asthma/                                                                      |
|              | 14 | exp Anti-asthmatic agents/                                                       |
|              | 15 | exp Bronchial Hyperreactivity/                                                   |
|              | 16 | exp Respiratory Hypersensitivity/                                                |
|              | 17 | 13 OR 14 OR 15 OR 16                                                             |
|              | 18 | Limit 17 to systematic reviews                                                   |
|              | 19 | Limit 18 to 2000-current                                                         |
| Intervention | 20 | Program*.mp.                                                                     |
|              | 21 | Intervention*.mp.                                                                |
|              | 22 | Surgery .mp.                                                                     |
|              | 23 | Education.mp.                                                                    |
|              | 24 | Assess*.mp.                                                                      |
|              | 25 | Exam*.mp.                                                                        |
|              | 26 | exp Health promotion/                                                            |
|              | 27 | exp Health Knowledge, Attitudes, Practice/                                       |
|              | 28 | Treatment or exp therapeutics/                                                   |
|              | 29 | exp Early diagnosis/                                                             |
|              | 30 | Screening.mp. or exp Mass Screening/                                             |
|              | 31 | exp Rehabilitation/                                                              |
|              | 32 | exp Patient care management/                                                     |
|              | 33 | Prevention.mp.                                                                   |
|              | 34 | exp Self-Management/                                                             |
|              | 35 | Self-monitoring.mp.                                                              |
|              | 36 | 20 OR 21 OR 24 OR 25 OR 26 OR 27 OR 28 OR 29 OR 30 OR 31 OR 32 OR 33 OR 34 OR 35 |

| Category    | #  | Term                                  |
|-------------|----|---------------------------------------|
| Combination | 37 | Limit 34 to systematic reviews        |
|             | 38 | Limit 35 to 2000-current              |
|             | 39 | 10 AND 17                             |
|             | 40 | 10 AND 36                             |
|             | 41 | 10 AND 17 AND 36                      |
|             | 42 | <b>Limit 41 to systematic reviews</b> |
|             | 43 | Limit 42 to 2000-current              |

## SICKLE CELL

| Category     | #  | Term                                              |
|--------------|----|---------------------------------------------------|
| Age          | 1  | exp child/                                        |
|              | 2  | children*.mp.                                     |
|              | 3  | child*.mp.                                        |
|              | 4  | (schoolchild* or school child*).mp.               |
|              | 5  | adolescen*.mp.                                    |
|              | 6  | teen*.mp.                                         |
|              | 7  | pubescen*.mp.                                     |
|              | 8  | school.mp.                                        |
|              | 9  | school-age.mp.                                    |
|              | 10 | 1 OR 2 OR 3 OR 4 OR 5 OR 6 OR 7 OR 8 OR 9         |
|              | 11 | Limit 10 to systematic reviews                    |
|              | 12 | Limit 11 to 2000-current                          |
| Condition    | 13 | exp Anemia, Sickle cell/                          |
|              | 14 | Vaso-occlusive crisis.mp                          |
|              | 15 | exp Acute chest syndrome/                         |
|              | 16 | Hemoglobin S Disease.mp OR Sickle cell disease.mp |
|              | 17 | Sickle cell disease.mp                            |
|              | 18 | 13 OR 14 OR 15 OR 16 OR 17                        |
|              | 19 | Limit 17 to systematic reviews                    |
|              | 20 | Limit 18 to 2000-current                          |
| Intervention | 21 | Program*.mp.                                      |
|              | 22 | Intervention*.mp.                                 |
|              | 23 | Surgery .mp.                                      |
|              | 24 | Education.mp.                                     |
|              | 25 | Assess*.mp.                                       |
|              | 26 | Exam*.mp.                                         |
|              | 27 | exp Health promotion/                             |
|              | 28 | exp Health Knowledge, Attitudes, Practice/        |

| Category    | #  | Term                                                                             |
|-------------|----|----------------------------------------------------------------------------------|
|             | 29 | Treatment or exp therapeutics/                                                   |
|             | 30 | exp Early diagnosis/                                                             |
|             | 31 | Screening.mp. or exp Mass Screening/                                             |
|             | 32 | exp Rehabilitation/                                                              |
|             | 33 | exp Patient care management/                                                     |
|             | 34 | Prevention.mp.                                                                   |
|             | 35 | exp Self-Management/                                                             |
|             | 36 | Self-monitoring.mp.                                                              |
|             | 37 | 21 OR 24 OR 25 OR 26 OR 27 OR 28 OR 29 OR 30 OR 31 OR 32 OR 33 OR 34 OR 35 or 36 |
|             | 38 | Limit 37 to systematic reviews                                                   |
|             | 39 | Limit 38 to 2000-current                                                         |
| Combination | 40 | 10 AND 18                                                                        |
|             | 41 | 10 AND 37                                                                        |
|             | 42 | 10 AND 18 AND 37                                                                 |
|             | 43 | <b>Limit 42 to systematic reviews</b>                                            |
|             | 44 | Limit 43 to 2000-current                                                         |

## RHEUMATIC FEVER

| Category  | #  | Term                                      |
|-----------|----|-------------------------------------------|
| Age       | 1  | exp child/                                |
|           | 2  | children*.mp.                             |
|           | 3  | child*.mp.                                |
|           | 4  | (schoolchild* or school child*).mp.       |
|           | 5  | adolescen*.mp.                            |
|           | 6  | teen*.mp.                                 |
|           | 7  | pubescen*.mp.                             |
|           | 8  | school.mp.                                |
|           | 9  | school-age.mp.                            |
|           | 10 | 1 OR 2 OR 3 OR 4 OR 5 OR 6 OR 7 OR 8 OR 9 |
|           | 11 | Limit 10 to systematic reviews            |
|           | 12 | Limit 11 to 2000-current                  |
| Condition | 13 | exp rheumatic fever/                      |
|           | 14 | exp rheumatic heart disease/              |
|           | 15 | acute rheumatic fever.mp                  |
|           | 16 | group A streptococcus.mp.                 |
|           | 17 | 13 OR 14 OR 15 OR 16                      |
|           | 18 | Limit 17 to systematic reviews            |
|           | 19 | Limit 18 to 2000-current                  |

| Category     | #  | Term                                                                             |
|--------------|----|----------------------------------------------------------------------------------|
| Intervention | 20 | Program*.mp.                                                                     |
|              | 21 | Intervention*.mp.                                                                |
|              | 22 | Surgery .mp.                                                                     |
|              | 23 | Education.mp.                                                                    |
|              | 24 | Assess*.mp.                                                                      |
|              | 25 | Exam*.mp.                                                                        |
|              | 26 | exp Health promotion/                                                            |
|              | 27 | exp Health Knowledge, Attitudes, Practice/                                       |
|              | 28 | Treatment or exp therapeutics/                                                   |
|              | 29 | exp Early diagnosis/                                                             |
|              | 30 | Screening.mp. or exp Mass Screening/                                             |
|              | 31 | exp Rehabilitation/                                                              |
|              | 32 | exp Patient care management/                                                     |
|              | 33 | Prevention.mp.                                                                   |
|              | 34 | exp Self-Management/                                                             |
|              | 35 | Self-monitoring.mp.                                                              |
|              | 36 | 20 OR 21 OR 24 OR 25 OR 26 OR 27 OR 28 OR 29 OR 30 OR 31 OR 32 OR 33 OR 34 OR 35 |
|              | 37 | Limit 34 to systematic reviews                                                   |
|              | 38 | Limit 35 to 2000-current                                                         |
| Combination  | 39 | 10 AND 17                                                                        |
|              | 40 | 10 AND 36                                                                        |
|              | 41 | 10 AND 17 AND 36                                                                 |
|              | 42 | <b>Limit 41 to systematic reviews</b>                                            |
|              | 43 | Limit 42 to 2000-current                                                         |

## EPILEPSY

| Category | #  | Term                                      |
|----------|----|-------------------------------------------|
| Age      | 1  | exp child/                                |
|          | 2  | children*.mp.                             |
|          | 3  | child*.mp.                                |
|          | 4  | (schoolchild* or school child*).mp.       |
|          | 5  | adolescen*.mp.                            |
|          | 6  | teen*.mp.                                 |
|          | 7  | pubescen*.mp.                             |
|          | 8  | school.mp.                                |
|          | 9  | school-age.mp.                            |
|          | 10 | 1 OR 2 OR 3 OR 4 OR 5 OR 6 OR 7 OR 8 OR 9 |

| Category     | #  | Term                                                                             |
|--------------|----|----------------------------------------------------------------------------------|
| Condition    | 11 | Limit 10 to systematic reviews                                                   |
|              | 12 | Limit 11 to 2000-current                                                         |
|              | 13 | exp Epilepsy/                                                                    |
|              | 14 | exp Drug resistant epilepsy/                                                     |
|              | 15 | exp Seizures/                                                                    |
|              | 16 | 13 OR 14 OR 15                                                                   |
| Intervention | 17 | Limit 16 to systematic reviews                                                   |
|              | 18 | Limit 17 to 2000-current                                                         |
|              | 19 | Program*.mp.                                                                     |
|              | 20 | Intervention*.mp.                                                                |
|              | 21 | Surgery .mp.                                                                     |
|              | 22 | Education.mp.                                                                    |
|              | 23 | Assess*.mp.                                                                      |
|              | 24 | Exam*.mp.                                                                        |
|              | 25 | exp Health promotion/                                                            |
|              | 26 | exp Health Knowledge, Attitudes, Practice/                                       |
|              | 27 | Treatment or exp therapeutics/                                                   |
|              | 28 | exp Early diagnosis/                                                             |
|              | 29 | Screening.mp. or exp Mass Screening/                                             |
|              | 30 | exp Rehabilitation/                                                              |
|              | 31 | exp Patient care management/                                                     |
|              | 32 | Prevention.mp.                                                                   |
|              | 33 | exp Self-Management/                                                             |
|              | 34 | self-monitoring.mp.                                                              |
|              | 35 | 19 OR 20 OR 21 OR 24 OR 25 OR 26 OR 27 OR 28 OR 29 OR 30 OR 31 OR 32 OR 33 OR 34 |
|              | 36 | Limit 35 to systematic reviews                                                   |
|              | 37 | Limit 36 to 2000-current                                                         |
| Combination  | 38 | 10 AND 16                                                                        |
|              | 39 | 10 AND 35                                                                        |
|              | 40 | 10 AND 16 AND 35                                                                 |
|              | 41 | <b>Limit 40 to systematic reviews</b>                                            |
|              | 42 | Limit 41 to 2000-current                                                         |

**TYPE 1 DIABETES**

| Category     | #  | Term                                                                             |
|--------------|----|----------------------------------------------------------------------------------|
| Age          | 1  | exp child/                                                                       |
|              | 2  | children*.mp.                                                                    |
|              | 3  | child*.mp.                                                                       |
|              | 4  | (schoolchild* or school child*).mp.                                              |
|              | 5  | adolescen*.mp.                                                                   |
|              | 6  | teen*.mp.                                                                        |
|              | 7  | pubescen*.mp.                                                                    |
|              | 8  | school.mp.                                                                       |
|              | 9  | school-age.mp.                                                                   |
|              | 10 | 1 OR 2 OR 3 OR 4 OR 5 OR 6 OR 7 OR 8 OR 9                                        |
|              | 11 | Limit 10 to systematic reviews                                                   |
|              | 12 | Limit 11 to 2000-current                                                         |
| Condition    | 13 | exp Diabetes Mellitus, Type 1/                                                   |
|              | 14 | (Type 1 diabetes mellitus or T1DM).mp.                                           |
|              | 15 | 13 OR 14                                                                         |
|              | 16 | Limit 15 to systematic reviews                                                   |
|              | 17 | Limit 16 to 2000-current                                                         |
| Intervention | 18 | Program*.mp.                                                                     |
|              | 19 | Intervention*.mp.                                                                |
|              | 20 | Surgery .mp.                                                                     |
|              | 21 | Education.mp.                                                                    |
|              | 22 | Assess*.mp.                                                                      |
|              | 23 | Exam*.mp.                                                                        |
|              | 24 | exp Health promotion/                                                            |
|              | 25 | exp Health Knowledge, Attitudes, Practice/                                       |
|              | 26 | Treatment or exp therapeutics/                                                   |
|              | 27 | exp Early diagnosis/                                                             |
|              | 28 | Screening.mp. or exp Mass Screening/                                             |
|              | 29 | exp Rehabilitation/                                                              |
|              | 30 | exp Patient care management/                                                     |
|              | 31 | Prevention.mp.                                                                   |
|              | 32 | exp Self-Management/                                                             |
|              | 33 | Self-monitoring.mp.                                                              |
|              | 34 | 18 OR 19 OR 20 OR 21 OR 24 OR 25 OR 26 OR 27 OR 28 OR 29 OR 30 OR 31 OR 32 OR 33 |
|              | 35 | Limit 34 to systematic reviews                                                   |
|              | 36 | Limit 35 to 2000-current                                                         |
| Combination  | 37 | 10 AND 15                                                                        |
|              | 38 | 10 AND 34                                                                        |



| Category | #  | Term                                  |
|----------|----|---------------------------------------|
|          | 39 | 10 AND 15 AND 34                      |
|          | 40 | <b>Limit 39 to systematic reviews</b> |
|          | 41 | Limit 40 to 2000-current              |

## CANCER

| Category     | #  | Term                                       |
|--------------|----|--------------------------------------------|
| Age          | 1  | exp child/                                 |
|              | 2  | children*.mp.                              |
|              | 3  | child*.mp.                                 |
|              | 4  | (schoolchild* or school child*).mp.        |
|              | 5  | adolescen*.mp.                             |
|              | 6  | teen*.mp.                                  |
|              | 7  | pubescen*.mp.                              |
|              | 8  | school.mp.                                 |
|              | 9  | school-age.mp.                             |
|              | 10 | 1 OR 2 OR 3 OR 4 OR 5 OR 6 OR 7 OR 8 OR 9  |
|              | 11 | Limit 10 to systematic reviews             |
|              | 12 | Limit 11 to 2000-current                   |
| Condition    | 13 | Childhood cancer.mp.                       |
|              | 14 | Adolescent cancer.mp.                      |
|              | 15 | exp Neoplasms/                             |
|              | 16 | exp Cancer Pain/                           |
|              | 17 | Cancer.mp.                                 |
|              | 18 | 13 OR 14 OR 15 OR 16 OR 17                 |
|              | 19 | Limit 18 to systematic reviews             |
|              | 20 | Limit 19 to 2000-current                   |
| Intervention | 21 | Program*.mp.                               |
|              | 22 | Intervention*.mp.                          |
|              | 23 | Surgery .mp.                               |
|              | 24 | Education.mp.                              |
|              | 25 | Assess*.mp.                                |
|              | 26 | Exam*.mp.                                  |
|              | 27 | exp Health promotion/                      |
|              | 28 | exp Health Knowledge, Attitudes, Practice/ |
|              | 29 | Treatment or exp therapeutics/             |
|              | 30 | exp Early diagnosis/                       |
|              | 31 | Screening.mp. or exp Mass Screening/       |
|              | 32 | exp Rehabilitation/                        |

| Category    | #  | Term                                                                                         |
|-------------|----|----------------------------------------------------------------------------------------------|
|             | 33 | exp Patient care management/                                                                 |
|             | 34 | Prevention.mp.                                                                               |
|             | 35 | exp Self-Management/                                                                         |
|             | 36 | self-monitoring.mp.                                                                          |
|             | 37 | exp Palliative Care/                                                                         |
|             | 38 | Chronic pain management.mp. or exp Pain Management/                                          |
|             | 39 | 21 OR 24 OR 25 OR 26 OR 27 OR 28 OR 29 OR 30 OR 31 OR 32 OR 33 OR 34 or 35 OR 36 OR 37 OR 38 |
|             | 40 | Limit 39 to systematic reviews                                                               |
|             | 41 | Limit 40 to 2000-current                                                                     |
| Combination | 42 | 10 AND 18                                                                                    |
|             | 43 | 10 AN 39                                                                                     |
|             | 44 | 10 AND 18 AND 39                                                                             |
|             | 45 | <b>Limit 39 to systematic reviews</b>                                                        |
|             | 46 | Limit 40 to 2000-current                                                                     |

## OUTDOOR POLLUTION

| Category  | #  | Term                                      |
|-----------|----|-------------------------------------------|
| Age       | 1  | exp child/                                |
|           | 2  | children*.mp.                             |
|           | 3  | child*.mp.                                |
|           | 4  | (schoolchild* or school child*).mp.       |
|           | 5  | adolescen*.mp.                            |
|           | 6  | teen*.mp.                                 |
|           | 7  | pubescen*.mp.                             |
|           | 8  | school.mp.                                |
|           | 9  | school-age.mp.                            |
|           | 10 | 1 OR 2 OR 3 OR 4 OR 5 OR 6 OR 7 OR 8 OR 9 |
|           | 11 | Limit 10 to systematic reviews            |
|           | 12 | Limit 11 to 2000-current                  |
| Condition | 13 | Outdoor air pollution.mp.                 |
|           | 14 | exp Environmental Exposure/               |
|           | 15 | exp Air Pollution/                        |
|           | 16 | exp Smog/                                 |
|           | 17 | 13 OR 14 OR 15 OR 16                      |
|           | 18 | Limit 17 to systematic reviews            |

| Category     | #  | Term                                                                             |
|--------------|----|----------------------------------------------------------------------------------|
|              | 19 | Limit 18 to 2000-current                                                         |
| Intervention | 20 | Program*.mp.                                                                     |
|              | 21 | Intervention*.mp.                                                                |
|              | 22 | Surgery .mp.                                                                     |
|              | 23 | Education.mp.                                                                    |
|              | 24 | Assess*.mp.                                                                      |
|              | 25 | Exam*.mp.                                                                        |
|              | 26 | exp Health promotion/                                                            |
|              | 27 | exp Health Knowledge, Attitudes, Practice/                                       |
|              | 28 | Treatment or exp therapeutics/                                                   |
|              | 29 | exp Early diagnosis/                                                             |
|              | 30 | Screening.mp. or exp Mass Screening/                                             |
|              | 31 | exp Rehabilitation/                                                              |
|              | 32 | exp Patient care management/                                                     |
|              | 33 | Prevention.mp.                                                                   |
|              | 34 | exp Self-Management/                                                             |
|              | 35 | Self-monitoring.mp.                                                              |
|              | 36 | 20 OR 21 OR 24 OR 25 OR 26 OR 27 OR 28 OR 29 OR 30 OR 31 OR 32 OR 33 OR 34 OR 35 |
|              | 37 | Limit 36 to systematic reviews                                                   |
|              | 38 | Limit 37 to 2000-current                                                         |
| Combination  | 39 | 10 AND 17                                                                        |
|              | 40 | 10 AND 36                                                                        |
|              | 41 | 10 AND 17 AND 36                                                                 |
|              | 42 | <b>Limit 41 to systematic reviews</b>                                            |
|              | 43 | Limit 42 to 2000-current                                                         |

## INDOOR POLLUTION

| Category | #  | Term                                      |
|----------|----|-------------------------------------------|
| Age      | 1  | exp child/                                |
|          | 2  | children*.mp.                             |
|          | 3  | child*.mp.                                |
|          | 4  | (schoolchild* or school child*).mp.       |
|          | 5  | adolescen*.mp.                            |
|          | 6  | teen*.mp.                                 |
|          | 7  | pubescen*.mp.                             |
|          | 8  | school.mp.                                |
|          | 9  | school-age.mp.                            |
|          | 10 | 1 OR 2 OR 3 OR 4 OR 5 OR 6 OR 7 OR 8 OR 9 |

| Category     | #  | Term                                                                             |
|--------------|----|----------------------------------------------------------------------------------|
| Condition    | 11 | Limit 10 to systematic reviews                                                   |
|              | 12 | Limit 11 to 2000-current                                                         |
|              | 13 | exp Air Pollution, Indoor/                                                       |
|              | 14 | exp Tobacco Smoke Pollution/                                                     |
|              | 15 | Indoor smoke.mp.                                                                 |
|              | 16 | Home air quality.mp.                                                             |
|              | 17 | 13 OR 14 OR 15 OR 16                                                             |
|              | 18 | Limit 17 to systematic reviews                                                   |
| Intervention | 19 | Limit 18 to 2000-current                                                         |
|              | 20 | Program*.mp.                                                                     |
|              | 21 | Intervention*.mp.                                                                |
|              | 22 | Surgery .mp.                                                                     |
|              | 23 | Education.mp.                                                                    |
|              | 24 | Assess*.mp.                                                                      |
|              | 25 | Exam*.mp.                                                                        |
|              | 26 | exp Health promotion/                                                            |
|              | 27 | exp Health Knowledge, Attitudes, Practice/                                       |
|              | 28 | Treatment or exp therapeutics/                                                   |
|              | 29 | exp Early diagnosis/                                                             |
|              | 30 | Screening.mp. or exp Mass Screening/                                             |
|              | 31 | exp Rehabilitation/                                                              |
|              | 32 | exp Patient care management/                                                     |
|              | 33 | Prevention.mp.                                                                   |
|              | 34 | exp Self-Management/                                                             |
|              | 35 | Self-monitoring.mp.                                                              |
|              | 36 | 20 OR 21 OR 24 OR 25 OR 26 OR 27 OR 28 OR 29 OR 30 OR 31 OR 32 OR 33 OR 34 OR 35 |
|              | 37 | Limit 34 to systematic reviews                                                   |
|              | 38 | Limit 35 to 2000-current                                                         |
| Combination  | 39 | 10 AND 17                                                                        |
|              | 40 | 10 AND 36                                                                        |
|              | 41 | 10 AND 17 AND 36                                                                 |
|              | 42 | <b>Limit 41 to systematic reviews</b>                                            |
|              | 43 | Limit 42 to 2000-current                                                         |

## ENVIROMENTAL CONTAMINENTS

| Category | # | Term          |
|----------|---|---------------|
| Age      | 1 | exp child/    |
|          | 2 | children*.mp. |

| Category     | #  | Term                                                                             |
|--------------|----|----------------------------------------------------------------------------------|
|              | 3  | child*.mp.                                                                       |
|              | 4  | (schoolchild* or school child*).mp.                                              |
|              | 5  | adolescen*.mp.                                                                   |
|              | 6  | teen*.mp.                                                                        |
|              | 7  | pubescen*.mp.                                                                    |
|              | 8  | school.mp.                                                                       |
|              | 9  | school-age.mp.                                                                   |
|              | 10 | 1 OR 2 OR 3 OR 4 OR 5 OR 6 OR 7 OR 8 OR 9                                        |
|              | 11 | Limit 10 to systematic reviews                                                   |
|              | 12 | Limit 11 to 2000-current                                                         |
| Condition    | 13 | Lead contaminants.mp.                                                            |
|              | 14 | exp Lead/ or exp Lead Poisoning, Nervous System, Childhood/                      |
|              | 15 | exp Environmental Pollutants/                                                    |
|              | 16 | exp Water Pollutants, Chemical/                                                  |
|              | 17 | exp Arsenic/                                                                     |
|              | 18 | 13 OR 14 OR 15 OR 16 OR 17                                                       |
|              | 19 | Limit 18 to systematic reviews                                                   |
|              | 20 | Limit 19 to 2000-current                                                         |
| Intervention | 21 | Program*.mp.                                                                     |
|              | 22 | Intervention*.mp.                                                                |
|              | 23 | Surgery .mp.                                                                     |
|              | 24 | Education.mp.                                                                    |
|              | 25 | Assess*.mp.                                                                      |
|              | 26 | Exam*.mp.                                                                        |
|              | 27 | exp Health promotion/                                                            |
|              | 28 | exp Health Knowledge, Attitudes, Practice/                                       |
|              | 29 | Treatment or exp therapeutics/                                                   |
|              | 30 | exp Early diagnosis/                                                             |
|              | 31 | Screening.mp. or exp Mass Screening/                                             |
|              | 32 | exp Rehabilitation/                                                              |
|              | 33 | exp Patient care management/                                                     |
|              | 34 | Prevention.mp.                                                                   |
|              | 35 | exp Self-Management/                                                             |
|              | 36 | Self-monitoring.mp.                                                              |
|              | 37 | 21 OR 24 OR 25 OR 26 OR 27 OR 28 OR 29 OR 30 OR 31 OR 32 OR 33 OR 34 OR 35 OR 36 |
|              | 38 | Limit 37 to systematic reviews                                                   |
|              | 39 | Limit 38 to 2000-current                                                         |
| Combination  | 40 | 10 AND 18                                                                        |

| Category | #  | Term                                  |
|----------|----|---------------------------------------|
|          | 41 | 10 AND 37                             |
|          | 42 | 10 AND 18 AND 37                      |
|          | 43 | <b>Limit 42 to systematic reviews</b> |
|          | 44 | Limit 43 to 2000-current              |

## Appendix C: Eligibility Criteria

### *Eligibility Criteria for Inclusion*

**Objective of review:** To synthesize the effectiveness of interventions that are being delivered to 5 to 19.9 year olds, in LMIC and HIC that may impact one of the three outcomes:

1. Morbidity
2. Mortality
3. Development

| Inclusion                                                                                                                                                                                                                                                                                                                                                                                                                                                                                                                                                                                                                                                                                                                                                                                                                           | Exclusion                                                                                                                                                                                                                                                                                                                                                                                                                                                                                                                                                                                                                                                             |
|-------------------------------------------------------------------------------------------------------------------------------------------------------------------------------------------------------------------------------------------------------------------------------------------------------------------------------------------------------------------------------------------------------------------------------------------------------------------------------------------------------------------------------------------------------------------------------------------------------------------------------------------------------------------------------------------------------------------------------------------------------------------------------------------------------------------------------------|-----------------------------------------------------------------------------------------------------------------------------------------------------------------------------------------------------------------------------------------------------------------------------------------------------------------------------------------------------------------------------------------------------------------------------------------------------------------------------------------------------------------------------------------------------------------------------------------------------------------------------------------------------------------------|
| <p><b>AGE-</b> if the mean age falls within 5-15, or the majority of participants are within that age range.</p> <p>*If a review does not specify an age range, but it appears to be specifically focused on children and adolescents, Include it.</p>                                                                                                                                                                                                                                                                                                                                                                                                                                                                                                                                                                              | <p><b>AGE-</b> the majority of participants are under 5, or the majority are adults, or includes a wide range of ages, e.g. 0-68 with no disaggregated data.</p>                                                                                                                                                                                                                                                                                                                                                                                                                                                                                                      |
| <p>Any <b>intervention</b> ( except interventions that would otherwise fall under and are specific to mental health or digital health review)</p> <p>*interventions that are delivered via a digital method and target our condition and outcomes of interest should be included.</p> <p>E.g., “Mobile app for children with diabetes to self-monitor blood glucose levels”. In this example the outcome is blood glucose levels, and since it’s directly related to the condition this should be included.</p> <p>E.g., “Psychosocial interventions for newly diagnosed children with type 1 diabetes to encourage regular self-glucose monitoring”, in this example the intervention is group therapy, but the outcome is improved glucose levels, since the outcome is directly related to diabetes this should be included.</p> | <p><b>Interventions</b> specifically targeting mental health conditions, and digital health (Screen time/screen use).</p> <p>E.g., “Treating depression with antidepressant medications in children with diabetes”. In this example the effectiveness of the intervention being measured is antidepressants, and the outcome is reduction of symptoms of depression. Since both intervention and outcomes are related to a secondary condition, this would not fall under our scope.</p> <p>E.g., “Interventions aimed at reducing screen time in youth with diabetes”. In this example the outcome is hours of screen time per day, and thus should be excluded.</p> |
| Includes quantitative data on the effectiveness of interventions (i.e. RR, OR, SMD).                                                                                                                                                                                                                                                                                                                                                                                                                                                                                                                                                                                                                                                                                                                                                | Narrative or descriptive summaries of results. No data on effectiveness of interventions (except Cancer)                                                                                                                                                                                                                                                                                                                                                                                                                                                                                                                                                              |

## Appendix D: Included Reviews

| Asthma                                                                                                                                                                                                                                                       |
|--------------------------------------------------------------------------------------------------------------------------------------------------------------------------------------------------------------------------------------------------------------|
| Chan M, Gray M, Burns C, et al. Community-based interventions for childhood asthma using comprehensive approaches: a systematic review and meta-analysis. <i>Allergy, Asthma &amp; Clinical Immunology</i> . 2021;17(1):1-16.                                |
| Fares MM, Alkhaled LH, Mroueh SM, Akl EA. Vitamin D supplementation in children with asthma: a systematic review and meta-analysis. <i>BMC Research Notes</i> . 2015;8:23.                                                                                   |
| Guevara JP, Wolf FM, Grum CM, Clark NM. Effects of educational interventions for self management of asthma in children and adolescents: systematic review and meta-analysis. <i>BMJ</i> . 2003;326(7402):1308-1309.                                          |
| Harris K, Kneale D, Lasserson TJ, McDonald VM, Grigg J, Thomas J. School-based self-management interventions for asthma in children and adolescents: a mixed methods systematic review. <i>Cochrane Database of Systematic Reviews</i> . 2019(1).            |
| Kneale D, Harris K, McDonald VM, Thomas J, Grigg J. Effectiveness of school-based self-management interventions for asthma among children and adolescents: Findings from a Cochrane systematic review and meta-analysis. <i>Thorax</i> . 2019;74(5):432-438. |
| Lin J, Zhang Y, He C, Dai J. Probiotics supplementation in children with asthma: A systematic review and meta-analysis. <i>Journal of Paediatrics and Child Health</i> . 2018;54(9):953-961.                                                                 |
| Mikhailov A, Kane I, Aronoff SC, Luck R, Delvecchio MT. Utility of adjunctive macrolide therapy in treatment of children with asthma: A systematic review and meta-analysis. <i>Journal of Asthma and Allergy</i> . 2013(6):23-29.                           |
| Mohammed S, Goodacre S. Intravenous and nebulised magnesium sulphate for acute asthma: Systematic review and meta-analysis. <i>Emergency Medicine Journal</i> . 2007;24(12):823-830.                                                                         |
| Pojsupap S, Iliriani K, Sampaio TZ, et al. Efficacy of high-dose vitamin D in pediatric asthma: a systematic review and meta-analysis. <i>Journal of Asthma</i> . 2015;52(4):382-390.                                                                        |
| Riverin BD, Maguire JL, Li P. Vitamin D supplementation for childhood asthma: A systematic review and meta-analysis. <i>PLoS ONE</i> . 2015;10 (8) (no pagination)(e0136841).                                                                                |
| Rodrigo GJ, Castro-Rodriguez JA. Anticholinergics in the treatment of children and adults with acute asthma: A systematic review with meta-analysis. <i>Thorax</i> . 2005;60(9):740-746.                                                                     |
| Rodrigo GJ, Neffen H. Systematic review on the use of omalizumab for the treatment of asthmatic children and adolescents. <i>Pediatric Allergy and Immunology</i> . 2015;26(6):551-556.                                                                      |
| Rodrigo GJ, Neffen H. Efficacy and safety of tiotropium in school-age children with moderate-to-severe symptomatic asthma: A systematic review. <i>Pediatric Allergy and Immunology</i> . 2017;28(6):573-578.                                                |
| Su Z, Li R, Gai Z. Intravenous and Nebulized Magnesium Sulfate for Treating Acute Asthma in Children: A Systematic Review and Meta-Analysis. <i>Pediatric Emergency Care</i> . 2018;34(6):390-395.                                                           |
| Wu J, Yang XW, Zhang M. Massage Therapy in Children with Asthma: A Systematic Review and Meta-Analysis. <i>Evidence-based Complementary and Alternative Medicine</i> . 2017;2017 (no pagination)(5620568).                                                   |
| Xu X, Wang HY, Zhang ZW, Han H, Wang Y. Effect of massage therapy on pulmonary functions of pediatric asthma: A systematic review and meta-analysis of randomized controlled trials. <i>European Journal of Integrative Medicine</i> . 2016;8(2):98-105.     |
| Yorke J, Fleming SL, Shuldham C. A systematic review of psychological interventions for children with asthma. <i>Pediatric Pulmonology</i> . 2007;42(2):114-124.                                                                                             |
| Zhang W, Wang Q, Liu L, Yang W, Liu H. Effects of physical therapy on lung function in children with asthma: a systematic review and meta-analysis. <i>Pediatric research</i> . 2020:1-9.                                                                    |



|                                                                                                                                                                                                                                                                                                    |
|----------------------------------------------------------------------------------------------------------------------------------------------------------------------------------------------------------------------------------------------------------------------------------------------------|
| Zhong CS, Melendez-Torres GJ. The effect of peer-led self-management education programmes for adolescents with asthma: A systematic review and meta-analysis. <i>Health Education Journal</i> . 2017;76(6):676-694.                                                                                |
| <b>Type 1 Diabetes</b>                                                                                                                                                                                                                                                                             |
| Al Khalifah RA, Alnhdi A, Alghar H, Alanazi M, Florez ID. The effect of adding metformin to insulin therapy for type 1 diabetes mellitus children: A systematic review and meta-analysis. <i>Pediatric Diabetes</i> . 2017;18(7):664-673.                                                          |
| Armour TA, Norris SL, Jack L, Jr., Zhang X, Fisher L. The effectiveness of family interventions in people with diabetes mellitus: a systematic review. <i>Diabetic Medicine</i> . 2005;22(10):1295-1305.                                                                                           |
| Benkhadra K, Alahdab F, Tamhane S, et al. Real-time continuous glucose monitoring in type 1 diabetes: a systematic review and individual patient data meta-analysis. <i>Clinical Endocrinology</i> . 2017;86(3):354-360.                                                                           |
| Hampson SE, Skinner TC, Hart J, et al. Effects of educational and psychosocial interventions for adolescents with diabetes mellitus: a systematic review. <i>Health Technology Assessment (Winchester, England)</i> . 2001;5(10):1-79.                                                             |
| Liu F, Guan Y, Li X, et al. Different Effects of Structured Education on Glycemic Control and Psychological Outcomes in Adolescent and Adult Patients with Type 1 Diabetes: A Systematic Review and Meta-Analysis. <i>International journal of endocrinology</i> . 2020;2020.                      |
| MacMillan F, Kirk A, Mutrie N, Matthews L, Robertson K, Saunders DH. A systematic review of physical activity and sedentary behavior intervention studies in youth with type 1 diabetes: study characteristics, intervention design, and efficacy. <i>Pediatric Diabetes</i> . 2014;15(3):175-189. |
| Winkley K, Ismail K, Landau S, Eisler I. Psychological interventions to improve glycaemic control in patients with type 1 diabetes: systematic review and meta-analysis of randomised controlled trials. <i>BMJ</i> . 2006;333(7558):65.                                                           |
| <b>Sickle Cell Disease</b>                                                                                                                                                                                                                                                                         |
| Asnani MR, Quimby KR, Bennett NR, Francis DK. Interventions for patients and caregivers to improve knowledge of sickle cell disease and recognition of its related complications. <i>Cochrane Database of Systematic Reviews</i> . 2016;10:CD011175.                                               |
| Estcourt LJ, Fortin PM, Hopewell S, Trivella M, Wang WC. Blood transfusion for preventing primary and secondary stroke in people with sickle cell disease. <i>Cochrane Database of Systematic Reviews</i> . 2017;1:CD003146.                                                                       |
| Frimpong A, Thiam LG, Arko-Boham B, Owusu EDA, Adjei GO. Safety and effectiveness of antimalarial therapy in sickle cell disease: a systematic review and network meta-analysis. <i>BMC Infectious Diseases</i> . 2018;18(1):650.                                                                  |
| Rankine-Mullings AE, Owusu-Ofori S. Prophylactic antibiotics for preventing pneumococcal infection in children with sickle cell disease. <i>Cochrane Database of Systematic Reviews</i> . 2017;10:CD003427.                                                                                        |
| Saramba MI, Shakya S, Zhao D. Analgesic management of uncomplicated acute sickle-cell pain crisis in pediatrics: a systematic review and meta-analysis. <i>Jornal de Pediatria</i> . 2019.                                                                                                         |
| <b>Rheumatic Fever/Rheumatic heart disease</b>                                                                                                                                                                                                                                                     |
| Altamimi S, Khalil A, Khalaiwi KA, Milner RA, Pusic MV, Al Othman MA. Cochrane review: Short versus standard duration antibiotic therapy for acute streptococcal pharyngitis in children. <i>Evidence-Based Child Health: A Cochrane Review Journal</i> . 2011;6(2):759-800.                       |
| Lennon D, Kerdemelidis M, Arroll B. Meta-analysis of trials of streptococcal throat treatment programs to prevent rheumatic fever. <i>Pediatric Infectious Disease Journal</i> . 2009;28(7):e259-e264.                                                                                             |
| <b>Epilepsy</b>                                                                                                                                                                                                                                                                                    |
| Cao Y, He X, Zhao L, et al. Efficacy and safety of Levetiracetam as adjunctive treatment in children with focal onset seizures: A systematic review and meta-analysis. <i>Epilepsy Research</i> . 2019;153:40-48.                                                                                  |
| Elliott J, DeJean D, Clifford T, et al. Cannabis-based products for pediatric epilepsy: A systematic review. <i>Epilepsia</i> . 2019;60(1):6-19.                                                                                                                                                   |

|                                                                                                                                                                                                                                                                                                  |
|--------------------------------------------------------------------------------------------------------------------------------------------------------------------------------------------------------------------------------------------------------------------------------------------------|
| Keene DL. A systematic review of the use of the ketogenic diet in childhood epilepsy. <i>Pediatric Neurology</i> . 2006;35(1):1-5.                                                                                                                                                               |
| Lefevre F, Aronson N. Ketogenic diet for the treatment of refractory epilepsy in children: A systematic review of efficacy. <i>Pediatrics</i> . 2000;105(4):E46.                                                                                                                                 |
| Rezaei S, Abdurahman AA, Saghaizadeh A, Badv RS, Mahmoudi M. Short-term and long-term efficacy of classical ketogenic diet and modified Atkins diet in children and adolescents with epilepsy: A systematic review and meta-analysis. <i>Nutritional Neuroscience</i> . 2019;22(5):317-334.      |
| <b>Cancer</b>                                                                                                                                                                                                                                                                                    |
| Coyne I, O'Mathúna DP, Gibson F, Shields L, Leclercq E, Sheaf G. Interventions for promoting participation in shared decision-making for children with cancer. <i>Cochrane Database of Systematic Reviews</i> . 2016(11).                                                                        |
| Zabih W, Thota AB, Mbah G, Freccero P, Gupta S, Denburg AE. Interventions to improve early detection of childhood cancer in low-and middle-income countries: A systematic review. <i>Pediatric Blood &amp; Cancer</i> . 2020;67(12):e28761.                                                      |
| <b>Indoor/outdoor pollution/environmental contaminants</b>                                                                                                                                                                                                                                       |
| Burns J, Boogaard H, Polus S, et al. Interventions to reduce ambient particulate matter air pollution and their effect on health. <i>Cochrane Database of Systematic Reviews</i> . 2019(5).                                                                                                      |
| Campbell M, Buckeridge D, Dwyer J, et al. A systematic review of the effectiveness of environmental awareness interventions. <i>Canadian Journal of Public Health Revue Canadienne de Sante Publique</i> . 2000;91(2):137-143.                                                                   |
| Nussbaumer-Streit B, Mayr V, Dobrescu AI, et al. Household interventions for secondary prevention of domestic lead exposure in children. <i>Cochrane Database of Systematic Reviews</i> . 2020(10).                                                                                              |
| Pfadenhauer LM, Burns J, Rohwer A, Rehfues EA. Effectiveness of interventions to reduce exposure to lead through consumer products and drinking water: A systematic review. <i>Environmental Research</i> . 2016;147:525-536.                                                                    |
| Quansah R, Semple S, Ochieng CA, et al. Effectiveness of interventions to reduce household air pollution and/or improve health in homes using solid fuel in low-and-middle income countries: A systematic review and meta-analysis. [Review]. <i>Environment International</i> . 2017;103:73-90. |
| Rosen LJ, Myers V, Winickoff JP, Kott J. Effectiveness of Interventions to Reduce Tobacco Smoke Pollution in Homes: A Systematic Review and Meta-Analysis. [Review]. <i>International Journal of Environmental Research &amp; Public Health</i> [Electronic Resource]. 2015;12(12):16043-16059.  |
| Rosen LJ, Noach MB, Winickoff JP, Hovell MF. Parental smoking cessation to protect young children: a systematic review and meta-analysis. <i>Pediatrics</i> . 2012;129(1):141-152.                                                                                                               |
| Thakur M, Nuyts PAW, Boudewijns EA, et al. Impact of improved cookstoves on women's and child health in low and middle income countries: a systematic review and meta-analysis. <i>Thorax</i> . 2018;73(11):1026-1040.                                                                           |

## Appendix E: Excluded reviews

|                                                                                                                                                                                                                                                                                                                            |
|----------------------------------------------------------------------------------------------------------------------------------------------------------------------------------------------------------------------------------------------------------------------------------------------------------------------------|
| <b>Asthma</b>                                                                                                                                                                                                                                                                                                              |
| Ahmad E, Grimes DE. The effects of self-management education for school-age children on asthma morbidity: a systematic review. <i>Journal of School Nursing</i> . 2011;27(4):282-292.                                                                                                                                      |
| Barnes C, Cauvin E, Duran-Kim M, Montalbano L, Londrigan M. A systematic review of the effectiveness of patient-centred care on emergency room visits, hospitalizations, unscheduled sick clinic visits, and missed school days for children with asthma. <i>JBIM Library of Systematic Reviews</i> . 2012;10(14):832-894. |
| Bussey-Smith KL, Rossen RD. A systematic review of randomized control trials evaluating the effectiveness of interactive computerized asthma patient education programs. <i>Annals of Allergy, Asthma and Immunology</i> . 2007;98(6):507-516.                                                                             |
| Carvalho Coelho AC, Barretto Cardoso LS, Souza-Machado CD, Souza-Machado A. The Impacts of Educational Asthma Interventions in Schools: A Systematic Review of the Literature. <i>Canadian Respiratory Journal</i> . 2016;2016 (no pagination)(8476206).                                                                   |
| Castro-Rodriguez JA, Beckhaus AA, Forno E. Efficacy of oral corticosteroids in the treatment of acute wheezing episodes in asthmatic preschoolers: Systematic review with meta-analysis. <i>Pediatric Pulmonology</i> . 2016.                                                                                              |
| Castro-Rodriguez JA, Rodrigo GJ, Rodriguez-Martinez CE. Principal findings of systematic reviews of acute asthma treatment in childhood. <i>Journal of Asthma</i> . 2015;52(10):1038-1045.                                                                                                                                 |
| Clarke SA, Calam R. The effectiveness of psychosocial interventions designed to improve health-related quality of life (HRQOL) amongst asthmatic children and their families: a systematic review. <i>Quality of Life Research</i> . 2012;21(5):747-764.                                                                   |
| Colombo GL, Di Matteo S, Martinotti C, et al. Omalizumab and long-term quality of life outcomes in patients with moderate-to-severe allergic asthma: a systematic review. <i>Therapeutic Advances in Respiratory Disease</i> . 2019;13(no pagination).                                                                     |
| Corren J, Kavati A, Ortiz B, et al. Efficacy and safety of omalizumab in children and adolescents with moderate-to-severe asthma: A systematic literature review. <i>Allergy and Asthma Proceedings</i> . 2017;38(4):250-263.                                                                                              |
| Corren J, Kavati A, Ortiz B, et al. Patient-reported outcomes in moderate-to-severe allergic asthmatics treated with omalizumab: a systematic literature review of randomized controlled trials. <i>Current Medical Research and Opinion</i> . 2018;34(1):65-80.                                                           |
| Cramer H, Posadzki P, Dobos G, Langhorst J. Yoga for asthma: a systematic review and meta-analysis. <i>Annals of Allergy, Asthma, &amp; Immunology</i> . 2014;112(6):503-510.e505.                                                                                                                                         |
| Crocker DD, Hopkins D, Kinyota S, Dumitru G, Herman E, Ligon C. A systematic review of home-based multi-trigger multi-component environmental interventions to reduce asthma morbidity. <i>Journal of Allergy and Clinical Immunology</i> . 2009;1:S20.                                                                    |
| Crosbie A. The effect of physical training in children with asthma on pulmonary function, aerobic capacity and health-related quality of life: a systematic review of randomized control trials. <i>Pediatric Exercise Science</i> . 2012;24(3):472-489.                                                                   |
| dos Santos K, Fausto LL, Camargos PAM, Kwiecinski MR, da Silva J. Impulse oscillometry in the assessment of asthmatic children and adolescents: from a narrative to a systematic review. <i>Paediatric Respiratory Reviews</i> . 2017;23:61-67.                                                                            |
| Drummond D, Monnier D, Tesniere A, Hadchouel A. A systematic review of serious games in asthma education. <i>Pediatric Allergy and Immunology</i> . 2017;28(3):257-265.                                                                                                                                                    |
| Ducharme FM. Anti-leukotrienes as add-on therapy to inhaled glucocorticoids in patients with asthma: systematic review of current evidence. <i>BMJ</i> . 2002;324(7353):1545.                                                                                                                                              |
| Francisco CDO, Bhatawadekar SA, Babineau J, Darlene Reid W, Yadollahi A. Effects of physical exercise training on nocturnal symptoms in asthma: Systematic review. <i>PLoS ONE</i> . 2018;13 (10) (no pagination)(e0204953).                                                                                               |

|                                                                                                                                                                                                                                                                                                                                                                  |
|------------------------------------------------------------------------------------------------------------------------------------------------------------------------------------------------------------------------------------------------------------------------------------------------------------------------------------------------------------------|
| Frois C, Wu EQ, Ray S, Colice GL. Inhaled corticosteroids or long-acting beta-agonists alone or in fixed-dose combinations in asthma treatment: A systematic review of fluticasone/budesonide and formoterol/salmeterol. <i>Clinical Therapeutics</i> . 2009;31(12):2779-2803.                                                                                   |
| Galantino ML, Galbavy R, Quinn L. Therapeutic effects of yoga for children: a systematic review of the literature. <i>Pediatric Physical Therapy</i> . 2008;20(1):66-80.                                                                                                                                                                                         |
| Garcia-Esteva R, Praena M, Ruiz-Canela J, Martin P, Beltran C. Systematic review of the usefulness of exhaled nitric oxide in management of childhood and adolescence asthma. <i>Allergy: European Journal of Allergy and Clinical Immunology</i> . 2011;94:667.                                                                                                 |
| George M, Topaz M. A systematic review of complementary and alternative medicine for asthma self-management. <i>Nursing Clinics of North America</i> . 2013;48(1):53-149.                                                                                                                                                                                        |
| Geryk LL, Roberts CA, Carpenter DM. A systematic review of school-based interventions that include inhaler technique education. <i>Respiratory Medicine</i> . 2017;132:21-30.                                                                                                                                                                                    |
| Giese JK. Evidence-based pediatric asthma interventions and outcome measures in a healthy homes program: An integrative review. <i>Journal of Asthma</i> . 2019;56(6):662-673.                                                                                                                                                                                   |
| Gillette C, Rockich-Winston N, Kuhn JA, Flesher S, Shepherd M. Inhaler Technique in Children With Asthma: A Systematic Review. <i>Academic Pediatrics</i> . 2016;16(7):605-615.                                                                                                                                                                                  |
| Grzelewski T, Stelmach I. Exercise-induced bronchoconstriction in asthmatic children: A comparative systematic review of the available treatment options. <i>Drugs</i> . 2009;69(12):1533-1553.                                                                                                                                                                  |
| Isik E, Isik IS. Asthma care coordination in schools by school nurses: An integrative literature review. <i>Public health nursing (Boston, Mass)</i> . 2019;36(4):498-506.                                                                                                                                                                                       |
| Jiang C, Jiang L, Qin Q. Conventional treatments plus acupuncture for asthma in adults and adolescent: A systematic review and meta-analysis. <i>Evidence-based Complementary and Alternative Medicine</i> . 2019;2019 (no pagination)(9580670).                                                                                                                 |
| Joos S, Miksch A, Szecsenyi J, et al. Montelukast as add-on therapy to inhaled corticosteroids in the treatment of mild to moderate asthma: A systematic review. <i>Thorax</i> . 2008;63(5):453-462.                                                                                                                                                             |
| Klijn SL, Hiligsmann M, Evers S, Roman-Rodriguez M, van der Molen T, van Boven JFM. Effectiveness and success factors of educational inhaler technique interventions in asthma & COPD patients: a systematic review. <i>NPJ Primary Care Respiratory Medicine</i> . 2017;27(1):24.                                                                               |
| Knopf JA, Finnie RKC, Peng Y, et al. School-based health centers to advance health equity: A community guide systematic review. <i>American Journal of Preventive Medicine</i> . 2016;51(1):114-126.                                                                                                                                                             |
| Kohn CM, Paudyal P. A systematic review and meta-analysis of complementary and alternative medicine in asthma. <i>European Respiratory Review</i> . 2017;26(143).                                                                                                                                                                                                |
| Labre MP, Herman EJ, Dumitru GG, Valenzuela KA, Cechman CL. Public health interventions for asthma: An umbrella review, 1990-2010. <i>American Journal of Preventive Medicine</i> . 2012;42(4):403-410.                                                                                                                                                          |
| Larenas-Linnemann D. Sublingual immunotherapy in children: complete and updated review supporting evidence of effect. <i>Current Opinion in Allergy &amp; Clinical Immunology</i> . 2009;9(2):168-176.                                                                                                                                                           |
| Lemmens KM, Nieboer AP, Huijsman R. A systematic review of integrated use of disease-management interventions in asthma and COPD. <i>Respiratory Medicine</i> . 2009;103(5):670-691.                                                                                                                                                                             |
| Leone FT, Fish JE, Szeffler SJ, West SL. Systematic review of the evidence regarding potential complications of inhaled corticosteroid use in asthma: collaboration of American College of Chest Physicians, American Academy of Allergy, Asthma, and Immunology, and American College of Allergy, Asthma, and Immunology. <i>Chest</i> . 2003;124(6):2329-2340. |
| Levinson J, Kohl K, Baltag V, Ross DA. Investigating the effectiveness of school health services delivered by a health provider: A systematic review of systematic reviews. <i>PLoS ONE</i> . 2019;14 (6) (no pagination)(e0212603).                                                                                                                             |

|                                                                                                                                                                                                                                                                          |
|--------------------------------------------------------------------------------------------------------------------------------------------------------------------------------------------------------------------------------------------------------------------------|
| Li P, Wahi G, Guttman A, Beyene J, Shah P. Interventions to improve outpatient follow-up in children with asthma who have attended the emergency department: A systematic review and meta-analysis. <i>Paediatrics and Child Health</i> . 2010;15 (SA):65A.              |
| Lin SY, Erekosima N, Kim JM, et al. Sublingual immunotherapy for the treatment of allergic rhinoconjunctivitis and asthma: A systematic review. <i>JAMA - Journal of the American Medical Association</i> . 2013;309(12):1278-1288.                                      |
| Liu CF, Chien LW. Efficacy of acupuncture in children with asthma: a systematic review. <i>Italian Journal of Pediatrics</i> . 2015;41 (1) (no pagination)(155).                                                                                                         |
| Lochte L, Granell R, J.A CS, Henderson AJ. Childhood incident asthma and physical activity: A systematic literature review and meta-analysis with heterogeneity assessments. <i>Thorax</i> . 2010;4):A39-A40.                                                            |
| Lochte L, Nielsen KG, Petersen PE, Platts-Mills TAE. Childhood asthma and physical activity: A systematic review with meta-analysis and graphic appraisal tool for epidemiology assessment. <i>BMC Pediatrics</i> . 2016;16 (1) (no pagination)(50).                     |
| Martin J, Donaldson AN, Villarroel R, Parmar MK, Ernst E, Higginson IJ. Efficacy of acupuncture in asthma: systematic review and meta-analysis of published data from 11 randomised controlled trials. <i>European Respiratory Journal</i> . 2002;20(4):846-852.         |
| Masoli M, Weatherall M, Holt S, Beasley R. Systematic review of the dose-response relation of inhaled fluticasone propionate. <i>Archives of Disease in Childhood</i> . 2004;89(10):902-907.                                                                             |
| Massingham K, Fox S, Smaaldone A. Asthma therapy in pediatric patients: a systematic review of treatment with montelukast versus inhaled corticosteroids. <i>Journal of Pediatric Health Care</i> . 2014;28(1):51-62.                                                    |
| McTague K, Prizeman G, Shelley S, Eustace-Cook J, McCann E. Youths with asthma and their experiences of self-management education: a qualitative systematic review protocol. <i>JB I database of systematic reviews and implementation reports</i> . 2019;17(5):675-681. |
| Miligkos M, Bannuru RR, Alkofide H, Kher SR, Schmid CH, Balk EM. Leukotriene-receptor antagonists versus placebo in the treatment of asthma in adults and adolescents a systematic review and meta-analysis. <i>Annals of Internal Medicine</i> . 2015;163(10):756-767.  |
| Morrison D, Wyke S, Agur K, et al. Digital asthma self-management interventions: a systematic review. <i>Journal of medical Internet research</i> . 2014;16(2):e51.                                                                                                      |
| Mosnaim GS, Pappalardo AA, Resnick SE, et al. Behavioral Interventions to Improve Asthma Outcomes for Adolescents: A Systematic Review. <i>Journal of Allergy and Clinical Immunology: In Practice</i> . 2016;4(1):130-141.                                              |
| Muneswarao J, Ahmad Hassali MA, Ibrahim B, Saini B, Hyder Ali IA, ur Rehman A. Home Visits for Adult Patients with Asthma? A Systematic Review of Randomized Controlled Trials. <i>Chest</i> . 2019;155 (4 Supplement):167A.                                             |
| Norman G, Faria R, Paton F, et al. Omalizumab for the treatment of severe persistent allergic asthma: A systematic review and economic evaluation. <i>Health Technology Assessment</i> . 2013;17(52).                                                                    |
| Okelo SO, Butz AM, Sharma R, et al. Interventions to modify health care provider adherence to asthma guidelines: a systematic review. <i>Pediatrics</i> . 2013;132(3):517-534.                                                                                           |
| Pacheco DR, Silva MJ, Alexandrino AM, Torres RM. Exercise-related quality of life in subjects with asthma: a systematic review. <i>Journal of Asthma</i> . 2012;49(5):487-495.                                                                                           |
| Pakhale S, Luks V, Burkett A, Turner L. Effect of physical training on airway inflammation in bronchial asthma: a systematic review. <i>BMC Pulmonary Medicine</i> . 2013;13:38.                                                                                         |
| Papamichael MM, Itsiopoulos C, Susanto NH, Erbas B. Does adherence to the Mediterranean dietary pattern reduce asthma symptoms in children? A systematic review of observational studies. <i>Public Health Nutrition</i> . 2017;20(15):2722-2734.                        |

|                                                                                                                                                                                                                                                                                                                        |
|------------------------------------------------------------------------------------------------------------------------------------------------------------------------------------------------------------------------------------------------------------------------------------------------------------------------|
| Peters J, Stevenson M, Beverley C, Lim JN, Smith S. The clinical effectiveness and cost-effectiveness of inhaler devices used in the routine management of chronic asthma in older children: a systematic review and economic evaluation. <i>Health Technology Assessment (Winchester, England)</i> . 2002;6(5):1-167. |
| Pinnock H, Epiphaniou E, Pearce G, et al. Implementing supported self-management for asthma: a systematic review and suggested hierarchy of evidence of implementation studies. <i>BMC Medicine</i> . 2015;13:127.                                                                                                     |
| Pollock M, Sinha IP, Hartling L, Rowe BH, Schreiber S, Fernandes RM. Inhaled short-acting bronchodilators for managing emergency childhood asthma: an overview of reviews. <i>Allergy: European Journal of Allergy and Clinical Immunology</i> . 2017;72(2):183-200.                                                   |
| Postma J, Karr C, Kieckhefer G. Community health workers and environmental interventions for children with asthma: A systematic review. <i>Journal of Asthma</i> . 2009;46(6):564-576.                                                                                                                                 |
| Ram FS, Robinson SM, Black PN. Effects of physical training in asthma: a systematic review. <i>British Journal of Sports Medicine</i> . 2000;34(3):162-167.                                                                                                                                                            |
| Ram FS, Wright J, Brocklebank D, White JE. Systematic review of clinical effectiveness of pressurised metered dose inhalers versus other hand held inhaler devices for delivering beta (2 )agonists bronchodilators in asthma. <i>BMJ</i> . 2001;323(7318):901-905.                                                    |
| Rank MA, Hagan JB, Park MA, et al. The risk of asthma exacerbation after stopping low-dose inhaled corticosteroids: a systematic review and meta-analysis of randomized controlled trials. <i>Journal of Allergy &amp; Clinical Immunology</i> . 2013;131(3):724-729.                                                  |
| Reisman J, Schachter HM, Dales RE, et al. Treating asthma with omega-3 fatty acids: Where is the evidence? A systematic review. <i>BMC Complementary and Alternative Medicine</i> . 2006;6 (no pagination)(26).                                                                                                        |
| Retzlaff R, von Sydow K, Beher S, Haun MW, Schweitzer J. The efficacy of systemic therapy for internalizing and other disorders of childhood and adolescence: a systematic review of 38 randomized trials. <i>Family Process</i> . 2013;52(4):619-652.                                                                 |
| Rice JL, Diette GB, Suarez-Cuervo C, et al. Allergen-specific immunotherapy in the treatment of pediatric asthma: A systematic review. <i>Pediatrics</i> . 2018;141 (5) (no pagination)(e20173833).                                                                                                                    |
| Rivera Ramirez PA, Fiestas Saldarriaga FA. Efficacy and safety of fluticasone furoate nasal spray for perennial allergic rhinitis in adults and adolescents: A systematic review. <i>Value in Health</i> . 2018;21 (Supplement 1):S231.                                                                                |
| Rodrigo GJ, Castro-Rodriguez JA. Daily vs. intermittent inhaled corticosteroids for recurrent wheezing and mild persistent asthma: A systematic review with meta-analysis. <i>Respiratory Medicine</i> . 2013;107(8):1133-1140.                                                                                        |
| Rodrigo GJ, Moral VP, Marcos LG, Castro-Rodriguez JA. Safety of regular use of long-acting beta agonists as monotherapy or added to inhaled corticosteroids in asthma. A systematic review. <i>Pulmonary Pharmacology and Therapeutics</i> . 2009;22(1):9-19.                                                          |
| Rodrigo GJ, Neffen H, Castro-Rodriguez JA. Efficacy and safety of subcutaneous omalizumab vs placebo as add-on therapy to corticosteroids for children and adults with asthma: a systematic review. <i>Chest</i> . 2011;139(1):28-35.                                                                                  |
| Rodrigo GJ, Neffen H, Colodenco FD, Castro-Rodriguez JA. Formoterol for acute asthma in the emergency department: a systematic review with meta-analysis. <i>Annals of Allergy, Asthma and Immunology</i> . 2010;104(3):247-252.                                                                                       |
| Rodrigo GJ, Plaza V. Once-daily fluticasone furoate and vilanterol for adolescents and adults with symptomatic asthma A systematic review with meta-analysis. <i>Annals of Allergy, Asthma and Immunology</i> . 2016;116(6):565-570.                                                                                   |
| Rodrigo GJ, Rodrigo C, Pollack CV, Rowe B. Use of helium-oxygen mixtures in the treatment of acute asthma: a systematic review. <i>Chest</i> . 2003;123(3):891-896.                                                                                                                                                    |
| Rowe BH, Bretzlaff JA, Bourdon C, Bota GW, Camargo CA, Jr. Intravenous magnesium sulfate treatment for acute asthma in the emergency department: a systematic review of the literature. <i>Annals of Emergency Medicine</i> . 2000;36(3):181-190.                                                                      |

|                                                                                                                                                                                                                                                                                                                                                                          |
|--------------------------------------------------------------------------------------------------------------------------------------------------------------------------------------------------------------------------------------------------------------------------------------------------------------------------------------------------------------------------|
| Shepherd J, Rogers G, Anderson R, et al. Systematic review and economic analysis of the comparative effectiveness of different inhaled corticosteroids and their usage with long-acting beta2 agonists for the treatment of chronic asthma in adults and children aged 12 years and over. Health Technology Assessment (Winchester, England). 2008;12(19):iii-iv, 1-360. |
| Shields MD, F AL, Rivey MP, McElroy JC. Mobile direct observation of therapy (MDOT) - A rapid systematic review and pilot study in children with asthma. PLoS ONE. 2018;13 (2) (no pagination)(e0190031).                                                                                                                                                                |
| Shivashankar M, Mani D. A systematic review on asthma. Research Journal of Pharmaceutical, Biological and Chemical Sciences. 2015;6(1):679-687.                                                                                                                                                                                                                          |
| Sindi A, Todd DC, Nair P. Antiinflammatory effects of long-acting beta <sub>2</sub> -agonists in patients with asthma: A systematic review and metaanalysis. Chest. 2009;136(1):145-154.                                                                                                                                                                                 |
| Singh BB, Khorsan R, Vinjamury SP, Der-Martirosian C, Kizhakkeveetil A, Anderson TM. Herbal treatments of asthma: A systematic review. Journal of Asthma. 2007;44(9):685-698.                                                                                                                                                                                            |
| Slob EMA, Vijverberg SJH, Palmer CNA, et al. Pharmacogenetics of inhaled long-acting beta2-agonists in asthma: A systematic review. Pediatric Allergy and Immunology. 2018;29(7):705-714.                                                                                                                                                                                |
| Sobieraj DM, Weeda ER, Nguyen E, et al. Association of inhaled corticosteroids and long-acting beta-agonists as controller and quick relief therapy with exacerbations and symptom control in persistent asthma a systematic review and meta-analysis. JAMA - Journal of the American Medical Association. 2018;319(14):1485-1496.                                       |
| Sopo SM, Macchiaiolo M, Zorzi G, Tripodi S. Sublingual immunotherapy in asthma and rhinoconjunctivitis; systematic review of paediatric literature. Archives of Disease in Childhood. 2004;89(7):620-624.                                                                                                                                                                |
| Tasche MJ, Uijen JH, Bernsen RM, de Jongste JC, van der Wouden JC. Inhaled disodium cromoglycate (DSCG) as maintenance therapy in children with asthma: a systematic review. Thorax. 2000;55(11):913-920.                                                                                                                                                                |
| Uchima O, Sentell T, Dela Cruz MR, Braun KL. Community health workers in pediatric asthma education programs in the United States: A systematic literature review. Children's Health Care. 2019;48(2):215-243.                                                                                                                                                           |
| Villa-Roel C, Voaklander B, Ospina MB, Nikel T, Campbell S, Rowe BH. Effectiveness of written action plans for acute asthma: A systematic review. Journal of Asthma. 2018;55(2):188-195.                                                                                                                                                                                 |
| Walter H, Sadeque-Iqbal F, Ulysse R, Castillo D, Fitzpatrick A, Singleton J. Effectiveness of school-based family asthma educational programs on quality of life and asthma exacerbations in asthmatic children aged five to 18: A systematic review. JBI Database of Systematic Reviews and Implementation Reports. 2016;14(11):113-138.                                |
| Walters J, Foong YC, Le HCT, Wan D, Wood-Baker R, Beggs S. Swimming training benefits children and adolescents with asthma: Results of a systematic review. Respiriology. 2013;2):14.                                                                                                                                                                                    |
| Wanrooij VH, Willeboordse M, Dompeling E, van de Kant KD. Exercise training in children with asthma: a systematic review. British Journal of Sports Medicine. 2014;48(13):1024-1031.                                                                                                                                                                                     |
| Yang H, Xun P, He K. Fish and fish oil intake in relation to risk of asthma: A systematic review and meta-analysis. PLoS ONE. 2013;8 (11) (no pagination)(e80048).                                                                                                                                                                                                       |
| Zhang L, Mendoza RA. Doses of systemic corticosteroids in hospitalised children with acute asthma: A systematic review. Journal of Paediatrics & Child Health. 2006;42(4):179-183.                                                                                                                                                                                       |
| Abuabat F, AlAlwan A, Masuadi E, Murad MH, Jahdali HA, Ferwana MS. The role of oral magnesium supplements for the management of stable bronchial asthma: a systematic review and meta-analysis. npj Primary Care Respiratory Medicine. 2019;29 (1) (no pagination)(4).                                                                                                   |
| Adams N, Bestall J, Jones P. Beclomethasone at different doses for chronic asthma (review). Cochrane Database of Systematic Reviews. 2001(1):CD002879.                                                                                                                                                                                                                   |
| Adams NP, Jones PW. The dose-response characteristics of inhaled corticosteroids when used to treat asthma: An overview of Cochrane systematic reviews. Respiratory Medicine. 2006;100(8):1297-1306.                                                                                                                                                                     |

|                                                                                                                                                                                                                                                                                                                     |
|---------------------------------------------------------------------------------------------------------------------------------------------------------------------------------------------------------------------------------------------------------------------------------------------------------------------|
| Adhikari NK, Burns KE, Friedrich JO, Granton JT, Cook DJ, Meade MO. Effect of nitric oxide on oxygenation and mortality in acute lung injury: systematic review and meta-analysis. <i>BMJ</i> . 2007;334(7597):779.                                                                                                 |
| Azad MB, Coneys GJ, Kozyrskyj Prof AL, et al. Probiotic supplementation during pregnancy or infancy for the prevention of asthma and wheeze: Systematic review and meta-Analysis. <i>BMJ (Online)</i> . 2013;347 (no pagination)(f6471).                                                                            |
| Beckhaus AA, Riutort MC, Castro-Rodriguez JA. Inhaled versus systemic corticosteroids for acute asthma in children. A systematic review. <i>Pediatric Pulmonology</i> . 2014;49(4):326-334.                                                                                                                         |
| Brocklebank D, Ram F, Wright J, et al. Comparison of the effectiveness of inhaler devices in asthma and chronic obstructive airways disease: a systematic review of the literature. <i>Health Technology Assessment (Winchester, England)</i> . 2001;5(26):1-149.                                                   |
| Brocklebank D, Wright J, Cates C. Systematic review of clinical effectiveness of pressurised metered dose inhalers versus other hand held inhaler devices for delivering corticosteroids in asthma. <i>BMJ</i> . 2001;323(7318):896-900.                                                                            |
| Calamita Z, Saconato H, Pela AB, Atallah AN. Efficacy of sublingual immunotherapy in asthma: Systematic review of randomized-clinical trials using the Cochrane Collaboration method. <i>Allergy: European Journal of Allergy and Clinical Immunology</i> . 2006;61(10):1162-1172.                                  |
| Canter KS, Christofferson J, Scialla MA, Kazak AE. Technology-Focused Family Interventions in Pediatric Chronic Illness: A Systematic Review. <i>Journal of Clinical Psychology in Medical Settings</i> . 2019;26(1):68-87.                                                                                         |
| Castro-Rodriguez JA, Rodrigo GJ. The role of inhaled corticosteroids and montelukast in children with mild-moderate asthma: Results of a systematic review with meta-analysis. <i>Archives of Disease in Childhood</i> . 2010;95(5):365-370.                                                                        |
| Castro-Rodriguez JA, Rodrigo GJ, Rodriguez-Martinez CE. Principal findings of systematic reviews for chronic treatment in childhood asthma. <i>Journal of Asthma</i> . 2015;52(4):407-416.                                                                                                                          |
| Charlier N, Zupancic N, Fieuws S, Denhaerynck K, Zaman B, Moons P. Serious games for improving knowledge and self-management in young people with chronic conditions: a systematic review and meta-analysis. <i>Journal of the American Medical Informatics Association</i> . 2016;23(1):230-239.                   |
| Chelladurai Y, Suarez-Cuervo C, Erekosima N, et al. Effectiveness of subcutaneous versus sublingual immunotherapy for the treatment of allergic rhinoconjunctivitis and asthma: A systematic review. <i>Journal of Allergy and Clinical Immunology: In Practice</i> . 2013;1(4):361-369.                            |
| Chen KH, Chen CC, Liu HE, Tzeng PC, Glasziou PP. Effectiveness of paediatric asthma clinical pathways: a narrative systematic review. <i>Journal of Asthma</i> . 2014;51(5):480-492.                                                                                                                                |
| Clark CE, Arnold E, Lasserson TJ, Wu T. Herbal interventions for chronic asthma in adults and children: A systematic review and meta-analysis. <i>Primary Care Respiratory Journal</i> . 2010;19(4):307-314.                                                                                                        |
| Coffman JM, Cabana MD, Bekmezian A, et al. A systematic review of interventions to improve the prescribing of asthma medications to children. <i>American Journal of Respiratory and Critical Care Medicine Conference: American Thoracic Society International Conference, ATS</i> . 2010;181(1 MeetingAbstracts). |
| Colquitt JL, Kirby J, Green C, Cooper K, Trompeter RS. The clinical effectiveness and cost-effectiveness of treatments for children with idiopathic steroid-resistant nephrotic syndrome: A systematic review. <i>Health Technology Assessment</i> . 2007;11(21):iii-49.                                            |
| Crocker DD, Kinyota S, Dumitru GG, et al. Effectiveness of home-based, multi-trigger, multicomponent interventions with an environmental focus for reducing asthma morbidity: a community guide systematic review. <i>American Journal of Preventive Medicine</i> . 2011;41(2 Suppl 1):S5-32.                       |
| De Boeck K, Bodart E, De Baets F, et al. Montelukast for the treatment of children with asthma: A review. [Dutch]. <i>Tijdschrift voor Geneeskunde</i> . 2004;60(11):745-751.                                                                                                                                       |



|                                                                                                                                                                                                                                                                                                                                                                        |
|------------------------------------------------------------------------------------------------------------------------------------------------------------------------------------------------------------------------------------------------------------------------------------------------------------------------------------------------------------------------|
| Ducharme FM. Inhaled glucocorticoids versus leukotriene receptor antagonists as single agent asthma treatment: systematic review of current evidence. <i>BMJ</i> . 2003;326(7390):621.                                                                                                                                                                                 |
| Gesinde B, Harry S. The use of motivational interviewing in improving medication adherence for individuals with asthma: a systematic review. <i>Perspectives in Public Health</i> . 2018;138(6):329-335.                                                                                                                                                               |
| Goldstein S, Vogelberg C, Graham L, Hoz ADL, Kallsen K, Hamelmann EH. Tiotropium Provides Greater Improvements In FEV <sub>1</sub> Than An LTRA As Add-On To ICS In Children And Adolescents With Asthma: A Systematic Review. <i>Journal of Allergy and Clinical Immunology</i> . 2019;143 (2 Supplement):AB92.                                                       |
| Harris K, Kneale D, Lasserson TJ, McDonald VM, Grigg J, Thomas J. School-based self-management interventions for asthma in children and adolescents: a mixed methods systematic review. <i>Cochrane Database of Systematic Reviews</i> . 2019(1).                                                                                                                      |
| Isik E, Fredland NM, Freysteinson WM. School and Community-based Nurse-led Asthma Interventions for School-aged Children and Their Parents: A Systematic Literature Review. <i>Journal of Pediatric Nursing</i> . 2019;44:107-114.                                                                                                                                     |
| Jat KR, Khairwa A. Vitamin D and asthma in children: A systematic review and meta-analysis of observational studies. <i>Lung India</i> . 2017;34(4):355-363.                                                                                                                                                                                                           |
| Jolliffe DA, Greenberg L, Hooper RL, et al. Vitamin D supplementation to prevent asthma exacerbations: a systematic review and meta-analysis of individual participant data. <i>The Lancet Respiratory Medicine</i> . 2017;5(11):881-890.                                                                                                                              |
| Kelly KD, Spooner CH, Rowe BH. Nedocromil sodium versus sodium cromoglycate in treatment of exercise-induced bronchoconstriction: a systematic review. <i>European Respiratory Journal</i> . 2001;17(1):39-45.                                                                                                                                                         |
| Lancaster K, Abuzour A, Khaira M, et al. The Use and Effects of Electronic Health Tools for Patient Self-Monitoring and Reporting of Outcomes Following Medication Use: Systematic Review. <i>Journal of medical Internet research</i> . 2018;20(12):e294.                                                                                                             |
| Larenas-Linnemann DES, Pietropaolo-Cienfuegos DR, Calderon MA. Evidence of effect of subcutaneous immunotherapy in children: Complete and updated review from 2006 onward. <i>Annals of Allergy, Asthma and Immunology</i> . 2011;107(5):407-416.e411.                                                                                                                 |
| Lu M, Wu B, Che D, Qiao R, Gu H. FeNO and asthma treatment in children: A systematic review and meta-analysis. <i>Medicine</i> . 2015;94(4).                                                                                                                                                                                                                           |
| Macdonald C, Sternberg A, Hunter P. A systematic review and meta-analysis of interventions used to reduce exposure to house dust and their effect on the development and severity of asthma. <i>Ciencia &amp; Saude Coletiva</i> . 2008;13(6):1907-1915.                                                                                                               |
| Mahemuti G, Zhang H, Li J, Tieliwaerdi N, Ren L. Efficacy and side effects of intravenous theophylline in acute asthma: A systematic review and meta-analysis. <i>Drug Design, Development and Therapy</i> . 2018;12:99-120.                                                                                                                                           |
| Main C, Shepherd J, Anderson R, et al. Systematic review and economic analysis of the comparative effectiveness of different inhaled corticosteroids and their usage with long-acting beta2 agonists for the treatment of chronic asthma in children under the age of 12 years. <i>Health Technology Assessment (Winchester, England)</i> . 2008;12(20):1-174, iii-iv. |
| Mathew JL, Walia M. Systematic review on efficacy of magnesium (intravenous or nebulized) for acute asthma episodes in children. <i>Indian Pediatrics</i> . 2017;54(2):133-137.                                                                                                                                                                                        |
| McKeage K. Fluticasone propionate/formoterol fumarate: A review of its use in persistent asthma. <i>Drugs</i> . 2013;73(2):195-206.                                                                                                                                                                                                                                    |
| McKeage K, Keam SJ. Salmeterol fluticasone propionate: A review of its use in asthma. <i>Drugs</i> . 2009;69(13):1799-1828.                                                                                                                                                                                                                                            |
| Meltzer EO, Berger WE. A review of the efficacy and safety of once-daily tiotropium Respimat 2.5 micrograms in adults and adolescents with asthma. <i>Allergy and Asthma Proceedings</i> . 2018;39(1):14-26.                                                                                                                                                           |

|                                                                                                                                                                                                                                                                                                                                                                                                                                          |
|------------------------------------------------------------------------------------------------------------------------------------------------------------------------------------------------------------------------------------------------------------------------------------------------------------------------------------------------------------------------------------------------------------------------------------------|
| Mokoka M, McDonnell MJ, Cormican S, Boland F, Doyle F, Costello RW. Inhaled corticosteroid (ICS) and long acting beta-adrenoceptor agonist (LABA) therapy adherence reporting and monitoring in clinical trials of severe adult asthma drug treatments: A systematic review. American Journal of Respiratory and Critical Care Medicine Conference: American Thoracic Society International Conference, ATS. 2018;197(MeetingAbstracts). |
| Muley P, Shah M, Muley A. Omega-3 fatty acids supplementation in children to prevent asthma: Is it worthy? - A systematic review and meta-analysis. Journal of Allergy. 2015;2015 (no pagination)(312052).                                                                                                                                                                                                                               |
| Nurmatov U, Devereux G, Sheikh A. Nutrients and foods for the primary prevention of asthma and allergy: Systematic review and meta-analysis. Journal of Allergy and Clinical Immunology. 2011;127(3):724-733.                                                                                                                                                                                                                            |
| Pojsupap S, Iliriani K, Sampaio TZ, et al. Efficacy of high-dose vitamin D in pediatric asthma: a systematic review and meta-analysis. Journal of Asthma. 2015;52(4):382-390.                                                                                                                                                                                                                                                            |
| Ring N, Malcolm C, Wyke S, et al. Promoting the use of personal asthma action plans: A systematic review. Primary Care Respiratory Journal. 2007;16(5):271-283.                                                                                                                                                                                                                                                                          |
| Rodrigo GJ, Castro-Rodriguez JA. Heliox-driven beta2-agonists nebulization for children and adults with acute asthma: a systematic review with meta-analysis. Annals of Allergy, Asthma, & Immunology. 2014;112(1):29-34.                                                                                                                                                                                                                |
| Rodrigo GJ, Castro-Rodriguez JA. Tiotropium for the treatment of adolescents with moderate to severe symptomatic asthma: A systematic review with meta-analysis. Annals of Allergy, Asthma and Immunology. 2015;115(3):211-216.                                                                                                                                                                                                          |
| Saturnino LT, Salgado JB, Penha MF. Fluticasone propionate versus budesonide or beclomethasone as monotherapy treatment for asthma patients - A systematic review. Value in Health. 2015;18 (7):A839.                                                                                                                                                                                                                                    |
| Sayer B, Normansell R, Waterson S, Dennett E, Del Forno M, Dunleavy A. Cochrane review of the use of antibiotics for acute exacerbations of asthma. Allergy: European Journal of Allergy and Clinical Immunology. 2018;73 (Supplement 105):670-671.                                                                                                                                                                                      |
| Schuers M, Chapron A, Guihard H, Bouchez T, Darmon D. Impact of non-drug therapies on asthma control: A systematic review of the literature. European Journal of General Practice. 2019;25(2):65-76.                                                                                                                                                                                                                                     |
| Shan Z, Rong Y, Yang W, et al. Intravenous and nebulized magnesium sulfate for treating acute asthma in adults and children: A systematic review and meta-analysis. Respiratory Medicine. 2013;107(3):321-330.                                                                                                                                                                                                                           |
| Takeuchi M, Kano H, Takahashi K, Iwata T. Comparative effectiveness of inhaled corticosteroids for paediatric asthma: Protocol for a systematic review and Bayesian network meta-analysis. BMJ Open. 2015;5 (10) (no pagination)(e008501).                                                                                                                                                                                               |
| Teoh L, Cates C, Hurwitz M, Acworth J, Van asperen P, Chang AB. A cochrane systematic review-anticholinergic therapy for acute asthma in children. Respiriology. 2012;1):21.                                                                                                                                                                                                                                                             |
| Walters JA, Wood-Baker R, Walters EH. Long-acting beta2-agonists in asthma: an overview of Cochrane systematic reviews. Respiratory Medicine. 2005;99(4):384-395.                                                                                                                                                                                                                                                                        |
| Wang G, Zhang X, Zhang HP, et al. Corticosteroid plus beta<sub>2</sub>-agonist in a single inhaler as reliever therapy in intermittent and mild asthma: a proof-of-concept systematic review and meta-analysis. Respiratory Research. 2017;18(1):203.                                                                                                                                                                                    |
| Wang Q, Zhang W, Liu L, Yang W, Liu H. Effects of physical therapy on lung function in children with asthma study protocol for a systematic review and meta-analysis. Medicine (United States). 2019;98 (15) (no pagination)(e15226).                                                                                                                                                                                                    |
| Williamson GR, O'Connor A, Kayleigh EJ. Women's experiences of personalised support for asthma care during pregnancy: A systematic review of the literature. BMC Pregnancy and Childbirth. 2017;17 (1) (no pagination)(69).                                                                                                                                                                                                              |
| Wu H, Zhang C, Wang Y, Li Y. Does vitamin E prevent asthma or wheeze in children: A systematic review and meta-analysis. Paediatric Respiratory Reviews. 2018;27:60-68.                                                                                                                                                                                                                                                                  |
| <b>Type 1 Diabetes</b>                                                                                                                                                                                                                                                                                                                                                                                                                   |

|                                                                                                                                                                                                                                                                                                                                         |
|-----------------------------------------------------------------------------------------------------------------------------------------------------------------------------------------------------------------------------------------------------------------------------------------------------------------------------------------|
| Deylami R, Townson J, Mann M, Gregory JW. Systematic review of publicity interventions to increase awareness amongst healthcare professionals and the public to promote earlier diagnosis of type 1 diabetes in children and young people. <i>Pediatric Diabetes</i> . 2018;19(3):566-573.                                              |
| Charalampopoulos D, Hesketh KR, Amin R, Paes VM, Viner RM, Stephenson T. Psycho-educational interventions for children and young people with Type 1 Diabetes in the UK: How effective are they? A systematic review and meta-analysis. <i>PLoS ONE [Electronic Resource]</i> . 2017;12(6):e0179685.                                     |
| Winkley K, Landau S, Eisler I, Ismail K. Psychological interventions to improve glycaemic control in patients with type 1 diabetes: Systematic review and meta-analysis of randomised controlled trials. <i>British Medical Journal</i> . 7558;333(7558):65-68.                                                                         |
| Verbeeten KC, Elks CE, Daneman D, Ong KK. Association between childhood obesity and subsequent Type 1 diabetes: a systematic review and meta-analysis. <i>Diabetic Medicine</i> . 2011;28(1):10-18.                                                                                                                                     |
| Subbarayan A. Structured education programmes for children with type 1 diabetes: A systematic review. <i>Hormone Research in Paediatrics</i> . Conference: 54th Annual Meeting of the European Society for Paediatric Endocrinology, ESPE 2015. Barcelona Spain. Conference Publication: (var.pagings). 2084 (SUPPL. 2011) (pp 2088).   |
| Spencer J, Cooper H, Milton B. Type 1 diabetes and adolescence: An exploration of lived experiences. <i>Diabetic Medicine</i> . Conference: Diabetes UK Annual Professional Conference. Liverpool United Kingdom. Conference Publication: (var.pagings). 27 (22 SUPPL. 21) (pp 113).                                                    |
| Song Y, Nam S, Ahn E, Kim SA. Qualitative meta-synthesis of changing support on self-care in type 1 diabetes. <i>Diabetes</i> . Conference: 77th Scientific Sessions of the American Diabetes Association, ADA 2017. United States. 2066 (Supplement 2011) (pp A2221-A2222).                                                            |
| Salema NEM, Elliott RA, Glazebrook C. A systematic review of adherence-enhancing interventions in adolescents taking long-term medicines. <i>Journal of Adolescent Health</i> . 2011;49(5):455-466.                                                                                                                                     |
| Salema NE, Elliott RA, Glazebrook C. A systematic review of adherence-enhancing interventions in adolescents taking long-term medicines. <i>Journal of Adolescent Health</i> . 2011;49(5):455-466.                                                                                                                                      |
| Pansier B, Schulz PJ. School-based diabetes interventions and their outcomes: A systematic literature review. <i>Journal of Public Health Research</i> . 2015;4(1):65-71.                                                                                                                                                               |
| Lohan A, Morawska A, Mitchell A. A systematic review of parenting interventions for parents of children with type 1 diabetes. <i>Child: Care, Health &amp; Development</i> . 2015;41(6):803-817.                                                                                                                                        |
| La Banca RO, Bueno M, Costa T, De Cassia Sparapani V, Nascimento LC. Educational strategies on insulin therapy for young people with diabetes mellitus: Systematic review. <i>Diabetology and Metabolic Syndrome</i> . Conference: 21st Brazilian Diabetes Society Congress. Brazil. 10 (Supplement 21) (no pagination).                |
| Kulkarni S, Wadhwa N, Deshpande R, et al. mHealth in management of type 1 diabetes: A systematic review of the published clinical trials (METTLE). <i>Pediatric Diabetes</i> . Conference: 42nd Annual Meeting of the International Society for Pediatric and Adolescent Diabetes, ISPAD 2016. Spain. 2017 (Supplement 2024) (pp 2116). |
| Knox ECL, Quirk H, Glazebrook C, Randell T, Blake H. Impact of technology-based interventions for children and young people with type 1 diabetes on key diabetes self-management behaviours and prerequisites: a systematic review. <i>BMC Endocrine Disorders</i> . 2019;19(1):7.                                                      |
| Kirk S, Beatty S, Callery P, Gellatly J, Milnes L, Prymachuk S. The effectiveness of self-care support interventions for children and young people with long-term conditions: a systematic review. <i>Child: Care, Health &amp; Development</i> . 2013;39(3):305-324.                                                                   |
| Horigan G, Davies M, Findlay-White F, Chaney D, Coates V. Reasons why patients referred to diabetes education programmes choose not to attend: a systematic review. <i>Diabetic Medicine</i> . 2017;34(1):14-26.                                                                                                                        |

|                                                                                                                                                                                                                                                                                                                                                                                                 |
|-------------------------------------------------------------------------------------------------------------------------------------------------------------------------------------------------------------------------------------------------------------------------------------------------------------------------------------------------------------------------------------------------|
| Holtz BE, Murray KM, Kaiser MM. Games for children with type 1 diabetes: A systematic review. Diabetes.Conference:77th Scientific Sessions of the American Diabetes Association, ADA 2017. United States. 2066 (Supplement 2011) (pp A2640).                                                                                                                                                    |
| Herbert L, Owen V, Pascarella L, Streisand R. Text message interventions for children and adolescents with type 1 diabetes: a systematic review. Diabetes Technology & Therapeutics. 2013;15(5):362-370.                                                                                                                                                                                        |
| Hatherly K, Overland J, Smith L, Taylor S, Johnston C. Providing optimal service delivery for children and adolescents with type 1 diabetes: A systematic review. Practical Diabetes International. 2009;26(4):154-159.                                                                                                                                                                         |
| Hampson SE, Skinner TC, Hart J, et al. Effects of educational and psychosocial interventions for adolescents with diabetes mellitus: a systematic review. Health Technology Assessment (Winchester, England). 2001;5(10):1-79.                                                                                                                                                                  |
| Hamm MP, Shulhan J, Williams G, Milne A, Scott SD, Hartling L. A systematic review of the use and effectiveness of social media in child health. BMC Pediatrics. 2014;14(1).                                                                                                                                                                                                                    |
| Groe J, Hornstein H, Manuwald U, Kugler J, Glauche I, Rothe U. Incidence of Diabetic Ketoacidosis of New-Onset Type 1 Diabetes in Children and Adolescents in Different Countries Correlates with Human Development Index (HDI): An Updated Systematic Review, Meta-Analysis, and Meta-Regression. Hormone and Metabolic Research. 2018;50(3):209-222.                                          |
| Feldman MA, Anderson LM, Shapiro JB, et al. Family-Based Interventions Targeting Improvements in Health and Family Outcomes of Children and Adolescents with Type 1 Diabetes: a Systematic Review. Current Diabetes Reports. 2018;18(3):15.                                                                                                                                                     |
| Elahi F, Price K, Herbert J. Educating the younger child with type 1 diabetes: A review of the literature. Pediatric Diabetes.Conference:Joint Annual Conference of the International Society for Pediatric and Adolescent Diabetes and Australasian Paediatric Endocrine Group, ISPAD+APEG 2015. Brisbane, QLD Australia. Conference Publication: (var.pagings). 2016 (SUPPL. 2021) (pp 2088). |
| Edwards D, Noyes J, Lowes L, Haf Spencer L, Gregory JW. An ongoing struggle: a mixed-method systematic review of interventions, barriers and facilitators to achieving optimal self-care by children and young people with type 1 diabetes in educational settings. BMC Pediatrics. 2014;14:228.                                                                                                |
| Didsbury MS, Kim S, Medway MM, et al. Socio-economic status and quality of life in children with chronic disease: A systematic review. Journal of Paediatrics and Child Health. 2016;52(12):1062-1069.                                                                                                                                                                                          |
| Didsbury M, Kim S, Medway M, Tong A, Craig J, Wong G. The impact of social disadvantage among caregivers on the quality of life of children with chronic diseases-a systematic review. Nephrology.Conference:50th Annual Scientific Meeting of the Australian and New Zealand Society of Nephrology. Melbourne, VIC Australia. Conference Publication: (var.pagings). 19 (SUPPL. 54) (pp 31).   |
| Deacon AJ, Edirippulige S. Using mobile technology to motivate adolescents with type 1 diabetes mellitus: A systematic review of recent literature. Journal of Telemedicine & Telecare. 2015;21(8):431-438.                                                                                                                                                                                     |
| Cohen E, Jovcevska V, Kuo DZ, Mahant S. Hospital-based comprehensive care programs for children with special health care needs: A systematic review. Archives of Pediatrics and Adolescent Medicine. 2011;165(6):554-561.                                                                                                                                                                       |
| Churchill JN, Ruppe RL, Smaldone A. Use of continuous insulin infusion pumps in young children with type 1 diabetes: a systematic review. Journal of Pediatric Health Care. 2009;23(3):173-179.                                                                                                                                                                                                 |
| Chu PY, Maslow GR, von Isenburg M, Chung RJ. Systematic Review of the Impact of Transition Interventions for Adolescents With Chronic Illness on Transfer From Pediatric to Adult Healthcare. Journal of Pediatric Nursing. 2015;30(5):e19-27.                                                                                                                                                  |
| Canter KS, Christofferson J, Scialla MA, Kazak AE. Technology-Focused Family Interventions in Pediatric Chronic Illness: A Systematic Review. Journal of Clinical Psychology in Medical Settings. 2019;26(1):68-87.                                                                                                                                                                             |
| Calvo-Munoz I, Gomez-Conesa A. Effect of physical exercise on metabolic control and cardiorespiratory function in children and adolescents with type 1 diabetes mellitus. Systematic review. Avances en Diabetologia.                                                                                                                                                                           |

|                                                                                                                                                                                                                                                                                       |
|---------------------------------------------------------------------------------------------------------------------------------------------------------------------------------------------------------------------------------------------------------------------------------------|
| Begg IF. The family impact of a child's Type 1 diabetes diagnosis: A systematic review. Diabetic Medicine.Conference:Diabetes UK Professional Conference 2016. Glasgow United Kingdom. Conference Publication: (var.pagings). 2033 (SUPPL. 2011) (pp 2173).                           |
| Begg IF. The family impact of a child's Type 1 diabetes diagnosis: A systematic review. Diabetic Medicine.Conference:Diabetes UK Professional Conference 2016. Glasgow United Kingdom. Conference Publication: (var.pagings). 2033 (SUPPL. 2011) (pp 2173).                           |
| Ayling K, Brierley S, Johnson B, Heller S, Eiser C. Efficacy of theory-based interventions for young people with type 1 diabetes: a systematic review and meta-analysis. British Journal of Health Psychology. 2015;20(2):428-446.                                                    |
| Angus VC, Waugh N. Hospital admission patterns subsequent to diagnosis of type 1 diabetes in children : a systematic review. BMC Health Services Research. 2007;7:199.                                                                                                                |
| Alsaleh FM, Smith FJ, Taylor KM. Experiences of children/young people and their parents, using insulin pump therapy for the management of type 1 diabetes: qualitative review. Journal of Clinical Pharmacy and Therapeutics. 2012;37(2):140-147.                                     |
| Abualula NA, Jacobsen KH, Milligan RA, Rodan MF, Conn VS. Evaluating Diabetes Educational Interventions With a Skill Development Component in Adolescents With Type 1 Diabetes: A Systematic Review Focusing on Quality of Life. Diabetes Educator. 2016;42(5):515-528.               |
| <b>Sickle Cell Disease</b>                                                                                                                                                                                                                                                            |
| Dekker LH, Fijnvandraat K, Brabin BJ, van Hensbroek MB. Micronutrients and sickle cell disease, effects on growth, infection and vaso-occlusive crisis: A systematic review. Pediatric Blood & Cancer. 2012;59(2):211-215.                                                            |
| Fortin PM, Hopewell S, Estcourt LJ. Red blood cell transfusion to treat or prevent complications in sickle cell disease: an overview of Cochrane reviews. Cochrane Database of Systematic Reviews. 2018;8:CD012082.                                                                   |
| Aboursheid T, Albaroudi O, Alahdab F. Inhaled nitric oxide for treating pain crises in people with sickle cell disease. The Cochrane database of systematic reviews. 2019;10(pp CD011808).                                                                                            |
| Aguilar-Salinas P, Hayward K, Santos R, et al. Surgical Revascularization for Pediatric Patients with Sickle Cell Disease and Moyamoya Disease in the Prevention of Ischemic Strokes: A Single-Center Case Series and a Systematic Review. World Neurosurgery. 2019;123:435-442.e438. |
| Al Hajeri A, Fedorowicz Z. Piracetam for reducing the incidence of painful sickle cell disease crises. Cochrane Database of Systematic Reviews. 2016;2:CD006111.                                                                                                                      |
| Allali S, Chalumeau M, Launay O, Ballas SK, de Montalembert M. Conjugate Haemophilus influenzae type b vaccines for sickle cell disease. Cochrane Database of Systematic Reviews. 2018;8:CD011199.                                                                                    |
| Alvarez O, Montane B, Lopez G, Wilkinson J, Miller T. Early blood transfusions protect against microalbuminuria in children with sickle cell disease. Pediatric Blood & Cancer. 2006;47(1):71-76.                                                                                     |
| Asnani MR, Quimby KR, Bennett NR, Francis DK. Interventions for patients and caregivers to improve knowledge of sickle cell disease and recognition of its related complications. Cochrane Database of Systematic Reviews. 2016;10:CD011175.                                          |
| Badawy SM, Cronin RM, Hankins J, et al. Patient-Centered eHealth Interventions for Children, Adolescents, and Adults With Sickle Cell Disease: Systematic Review. Journal of Medical Internet Research. 2018;20(7):e10940.                                                            |
| Ballas SK, Zeidan AM, Duong VH, DeVeaux M, Heeney MM. The effect of iron chelation therapy on overall survival in sickle cell disease and $\beta$ -thalassemia: A systematic review. American Journal of Hematology. 2018;93(7):943-952.                                              |
| Bavle A, Raj A, Kong M, Bertolone S. Impact of long-term erythrocytapheresis on growth and peak height velocity of children with sickle cell disease. Pediatric Blood & Cancer. 2014;61(11):2024-2030.                                                                                |
| Breakey VR, Harris L, Davis O, et al. The quality of information about sickle cell disease on the Internet for youth. Pediatric Blood & Cancer. 2017;64(4):e26309.                                                                                                                    |

|                                                                                                                                                                                                                                                                                                                             |
|-----------------------------------------------------------------------------------------------------------------------------------------------------------------------------------------------------------------------------------------------------------------------------------------------------------------------------|
| Calhoun CL, Abel RA, Pham HA, Thompson S, King AA. Implementation of an educational intervention to optimize self-management and transition readiness in young adults with sickle cell disease. <i>Pediatric Blood &amp; Cancer</i> . 2019;66(7):e27722.                                                                    |
| Chen C-J, Bakeera-Kitaka S, Mupere E, et al. Paediatric immunisation and chemoprophylaxis in a Ugandan sickle cell disease clinic. <i>Journal of Paediatrics and Child Health</i> . 2019;55(7):795-801.                                                                                                                     |
| Chen E, Cole SW, Kato PM. A review of empirically supported psychosocial interventions for pain and adherence outcomes in sickle cell disease. <i>Journal of Pediatric Psychology</i> . 2004;29(3):197-209.                                                                                                                 |
| Davies EG, Riddington C, Lottenberg R, Dower N. Pneumococcal vaccines for sickle cell disease. <i>Cochrane Database of Systematic Reviews</i> . 2004(1):CD003885.                                                                                                                                                           |
| Davies S, Olujohungbe A. Hydroxyurea for sickle cell disease. <i>Cochrane Database of Systematic Reviews</i> . 2001(2):CD002202.                                                                                                                                                                                            |
| Dixit R, Nettem S, Madan SS, et al. Folate supplementation in people with sickle cell disease. <i>Cochrane Database of Systematic Reviews</i> . 2018;2018 (3) (no pagination)(CD011130).                                                                                                                                    |
| Dunlop RJ, Bennett KC. Pain management for sickle cell disease. <i>Cochrane Database of Systematic Reviews</i> . 2006(2):CD003350.                                                                                                                                                                                          |
| Eccleston C, Palermo TM, Williams AC, et al. Psychological therapies for the management of chronic and recurrent pain in children and adolescents. <i>Cochrane Database of Systematic Reviews</i> . 2014(5):CD003968.                                                                                                       |
| Eckrich MJ, Wang WC, Yang E, et al. Adherence to transcranial Doppler screening guidelines among children with sickle cell disease. <i>Pediatric Blood &amp; Cancer</i> . 2013;60(2):270-274.                                                                                                                               |
| Fasano RM, Leong T, Kaushal M, Sagiv E, Luban NLC, Meier ER. Effectiveness of red blood cell exchange, partial manual exchange, and simple transfusion concurrently with iron chelation therapy in reducing iron overload in chronically transfused sickle cell anemia patients. <i>Transfusion</i> . 2016;56(7):1707-1715. |
| Feng S, Qiu Y, Li X, et al. Laparoscopic versus open splenectomy in children: a systematic review and meta-analysis. <i>Pediatric Surgery International</i> . 2016;32(3):253-259.                                                                                                                                           |
| Fisak B, Belkin MH, von Lehe AC, Bansal MM. The relation between health-related quality of life, treatment adherence and disease severity in a paediatric sickle cell disease sample. <i>Child: Care, Health and Development</i> . 2012;38(2):204-210.                                                                      |
| Fortin PM, Fisher SA, Madgwick KV, et al. Interventions for improving adherence to iron chelation therapy in people with sickle cell disease or thalassaemia. <i>Cochrane Database of Systematic Reviews</i> . 2018;5:CD012349.                                                                                             |
| Greenway A, Ware RE, Thornburg CD. Long-term results using hydroxyurea/phlebotomy for reducing secondary stroke risk in children with sickle cell anemia and iron overload. <i>American Journal of Hematology</i> . 2011;86(4):357-361.                                                                                     |
| Hankins JS, Helton KJ, McCarville MB, Li C-S, Wang WC, Ware RE. Preservation of spleen and brain function in children with sickle cell anemia treated with hydroxyurea. <i>Pediatric Blood &amp; Cancer</i> . 2008;50(2):293-297.                                                                                           |
| Hussain S, Nichols F, Bowman L, Xu H, Neunert C. Implementation of transcranial Doppler ultrasonography screening and primary stroke prevention in urban and rural sickle cell disease populations. <i>Pediatric Blood &amp; Cancer</i> . 2015;62(2):219-223.                                                               |
| Jacob E, Mueller BU. Pain Experience of Children with Sickle Cell Disease Who Had Prolonged Hospitalizations for Acute Painful Episodes. <i>Pain Medicine</i> . 2008;9(1):13-21.                                                                                                                                            |
| Jordan LC, Casella JF, DeBaun MR. Prospects for primary stroke prevention in children with sickle cell anaemia. <i>British Journal of Haematology</i> . 2012;157(1):14-25.                                                                                                                                                  |
| Kalpatthi R, Peters B, Kane I, et al. Safety and efficacy of high dose intravenous desferrioxamine for reduction of iron overload in sickle cell disease. <i>Pediatric Blood &amp; Cancer</i> . 2010;55(7):1338-1342.                                                                                                       |
| Madadi P, Enato EFO, Fulga S, et al. Patterns of paediatric analgesic use in Africa: A systematic review. <i>Archives of Disease in Childhood</i> . 2012;97(12):1086-1091.                                                                                                                                                  |

|                                                                                                                                                                                                                                                                                                                 |
|-----------------------------------------------------------------------------------------------------------------------------------------------------------------------------------------------------------------------------------------------------------------------------------------------------------------|
| Mazzucco S, Diomedi M, Qureshi A, Sainati L, Padayachee ST. Transcranial Doppler screening for stroke risk in children with sickle cell disease: a systematic review. <i>International Journal of Stroke</i> . 2017;12(6):580-588.                                                                              |
| Odey F, Okomo U, Oyo-Ita A. Vaccines for preventing invasive salmonella infections in people with sickle cell disease. <i>Cochrane Database of Systematic Reviews</i> . 2018;12:CD006975.                                                                                                                       |
| Okorji LM, Muntz DS, Liem RI. Opioid prescription practices at discharge and 30-day returns in children with sickle cell disease and pain. <i>Pediatric Blood &amp; Cancer</i> . 2017;64(5):e26319.                                                                                                             |
| Oligbu G, Fallaha M, Pay L, Ladhani S. Risk of invasive pneumococcal disease in children with sickle cell disease in the era of conjugate vaccines: a systematic review of the literature. <i>British Journal of Haematology</i> . 2019;185(4):743-751.                                                         |
| Oringanje C, Nemecek E, Oniyangi O. Hematopoietic stem cell transplantation for children with sickle cell disease. <i>Cochrane Database of Systematic Reviews</i> . 2009(1):CD007001.                                                                                                                           |
| Rabb LM, Grandison Y, Mason K, Hayes RJ, Serjeant B, Serjeant GR. A trial of folate supplementation in children with homozygous sickle cell disease. <i>British Journal of Haematology</i> . 1983;54(4):589-594.                                                                                                |
| Sil S, Cohen LL, Dampier C. Pediatric pain screening identifies youth at risk of chronic pain in sickle cell disease. <i>Pediatric Blood &amp; Cancer</i> . 2019;66(3):e27538.                                                                                                                                  |
| Singer ST, Quirolo K, Nishi K, Hackney-Stephens E, Evans C, Vichinsky EP. Erythrocytapheresis for chronically transfused children with sickle cell disease: An effective method for maintaining a low hemoglobin S level and reducing iron overload. <i>Journal of Clinical Apheresis</i> . 1999;14(3):122-125. |
| Soe HH, Abas AB, Than NN, et al. Vitamin D supplementation for sickle cell disease. <i>Cochrane Database of Systematic Reviews</i> . 2017;1:CD010858.                                                                                                                                                           |
| Strouse JJ, Takemoto CM, Keefer JR, Kato GJ, Casella JF. Corticosteroids and increased risk of readmission after acute chest syndrome in children with sickle cell disease. <i>Pediatric Blood &amp; Cancer</i> . 2008;50(5):1006-1012.                                                                         |
| Than NN, Soe HHK, Palaniappan SK, Abas AB, De Franceschi L. Magnesium for treating sickle cell disease. <i>Cochrane Database of Systematic Reviews</i> . 2017;4:CD011358.                                                                                                                                       |
| <b>Rheumatic Fever/Rheumatic heart disease</b>                                                                                                                                                                                                                                                                  |
| Wang D, Liu M, Lin S, et al. Stroke and rheumatic heart disease: a systematic review of observational studies. <i>Clinical Neurology &amp; Neurosurgery</i> . 2013;115(9):1575-1582.                                                                                                                            |
| Foisy M, Martin B, Domino F, Becker LA. The Cochrane Library and the Treatment of Sore Throat in Children and Adolescents: An Overview of Reviews. <i>Evidence-Based Child Health: A Cochrane Review Journal</i> . 2011;6(3):810-823.                                                                           |
| Etnel JRG, Elmont LC, Ertekin E, et al. Outcome after aortic valve replacement in children: A systematic review and meta-analysis. <i>Journal of Thoracic and Cardiovascular Surgery</i> . 2016;151(1):143-152e143.                                                                                             |
| Zuhlke LJ, Engel ME, Watkins D, Mayosi BM. Incidence, prevalence and outcome of rheumatic heart disease in South Africa: A systematic review of contemporary studies. <i>International Journal of Cardiology</i> . 2015;199:375-383.                                                                            |
| van Driel ML, De Sutter AIM, Habraken H, Thorning S, Christiaens T. Different antibiotic treatments for group A streptococcal pharyngitis. <i>Cochrane Database of Systematic Reviews</i> . 2016(9).                                                                                                            |
| Stewart EH, Davis B, Clemans-Taylor BL, Littenberg B, Estrada CA, Centor RM. Rapid Antigen Group A Streptococcus Test to Diagnose Pharyngitis: A Systematic Review and Meta-Analysis. <i>PLoS ONE</i> . 2014;9 (11) (no pagination)(e111727).                                                                   |
| Steer AC, Carapetis JR, Nolan TM, Shann F. Systematic review of rheumatic heart disease prevalence in children in developing countries: the role of environmental factors. <i>Journal of Paediatrics &amp; Child Health</i> . 2002;38(3):229-234.                                                               |

|                                                                                                                                                                                                                                                                                                    |
|----------------------------------------------------------------------------------------------------------------------------------------------------------------------------------------------------------------------------------------------------------------------------------------------------|
| <p>Rothenbuhler M, O'Sullivan CJ, Stortecky S, et al. Active surveillance for rheumatic heart disease in endemic regions: A systematic review and meta-analysis of prevalence among children and adolescents. <i>The Lancet Global Health</i>. 2014;2(12):e717-e726.</p>                           |
| <p>Robertson KA, Volmink JA, Mayosi BM. Antibiotics for the primary prevention of acute rheumatic fever: a meta-analysis. <i>BMC Cardiovascular Disorders</i>. 2005;5(1):11.</p>                                                                                                                   |
| <p>Oliver J, Malliya Wadu E, Pierse N, Moreland NJ, Williamson DA, Baker MG. Group A Streptococcus pharyngitis and pharyngeal carriage: A meta-analysis. <i>PLoS Neglected Tropical Diseases</i>. 2018;12 (3) (no pagination)(e0006335).</p>                                                       |
| <p>Moloi AH, Mall S, Engel ME, et al. The Health Systems Barriers and Facilitators for RHD Prevalence: An Epidemiological Meta-Analysis From Uganda and Tanzania. <i>Global heart</i>. 2017;12(1):5-15.e13.</p>                                                                                    |
| <p>Mohammad SS, Nosadini M, Grattan-Smith P, Dale RC. Intravenous immunoglobulin in acute Sydenham's chorea: A systematic review. <i>Journal of Paediatrics and Child Health</i>. 2015;51(12):1235-1238.</p>                                                                                       |
| <p>Manyemba J, Mayosi BM. Intramuscular penicillin is more effective than oral penicillin in secondary prevention of rheumatic fever--a systematic review. <i>South African Medical Journal Suid-Afrikaanse Tydskrif Vir Geneeskunde</i>. 2003;93(3):212-218.</p>                                  |
| <p>Jackson SJ, Steer AC, Campbell H. Systematic Review: Estimation of global burden of non-suppurative sequelae of upper respiratory tract infection: rheumatic fever and post-streptococcal glomerulonephritis. <i>Tropical Medicine &amp; International Health</i>. 2011;16(1):2-11.</p>         |
| <p>Cohen JF, Cohen R, Levy C, et al. Selective testing strategies for diagnosing group A streptococcal infection in children with pharyngitis: a systematic review and prospective multicentre external validation study. <i>CMAJ Canadian Medical Association Journal</i>. 2015;187(1):23-32.</p> |
| <p>Cilliers A, Adler AJ, Saloojee H. Anti-inflammatory treatment for carditis in acute rheumatic fever. <i>Cochrane Database of Systematic Reviews</i>. 2015(5).</p>                                                                                                                               |
| <p>Bais DS. Rheumatic fever and rheumatic heart disease: A systematic review. <i>Cardiology (Switzerland)</i>. 2013;1):26.</p>                                                                                                                                                                     |
| <p>Anonymous. Antibiotics for acute group A streptococcal pharyngitis. <i>Prescrire International</i>. 2004;13(74):227-232.</p>                                                                                                                                                                    |
| <p>van Driel ML, De Sutter AI, Keber N, Habraken H, Christiaens T. Cochrane Review: Different antibiotic treatments for group A streptococcal pharyngitis. <i>Evidence-Based Child Health: A Cochrane Review Journal</i>. 2012;7(1):16-81.</p>                                                     |
| <p>Cilliers A, Adler AJ, Saloojee H. Anti-inflammatory treatment for carditis in acute rheumatic fever. <i>Cochrane Database of Systematic Reviews</i>. 2015(5):CD003176.</p>                                                                                                                      |
| <p>Altamimi S, Khalil A, Khalaiwi KA, Milner RA, Pusic MV, Al Othman MA. Short-term late-generation antibiotics versus longer term penicillin for acute streptococcal pharyngitis in children. <i>Cochrane Database of Systematic Reviews</i>. 2012(8):CD004872.</p>                               |
| <p><b>Epilepsy</b></p>                                                                                                                                                                                                                                                                             |
| <p>Zeiler FA, Matuszczak M, Teitelbaum J, Kazina CJ, Gillman LM. Intravenous Immunoglobulins for Refractory Status Epilepticus: A Scoping Systematic Review of the Pediatric Literature. <i>Journal of Pediatric Neurology</i>. 2017;15(6):305-315.</p>                                            |
| <p>Yan H, Toyota E, Anderson M, et al. A systematic review of deep brain stimulation for the treatment of drug-resistant epilepsy in childhood. <i>Journal of Neurosurgery Pediatrics</i>. 2018;23(3):274-284.</p>                                                                                 |
| <p>Yan H, Katz JS, Anderson M, et al. Method of invasive monitoring in epilepsy surgery and seizure freedom and morbidity: A systematic review. <i>Epilepsia</i>. 2019;60(9):1960-1972.</p>                                                                                                        |
| <p>West S, Nolan SJ, Newton R. Surgery for epilepsy: a systematic review of current evidence. <i>Epileptic Disorders</i>. 2016;18(2):113-121.</p>                                                                                                                                                  |



|                                                                                                                                                                                                                                                                                              |
|----------------------------------------------------------------------------------------------------------------------------------------------------------------------------------------------------------------------------------------------------------------------------------------------|
| Weijenberg A, Offringa M, Brouwer OF, Callenbach PM. RCTs with new antiepileptic drugs in children: a systematic review of monotherapy studies and their methodology. <i>Epilepsy Research</i> . 2010;91(1):1-9.                                                                             |
| Weijenberg A, Brouwer OF, Callenbach PM. Levetiracetam Monotherapy in Children with Epilepsy: A Systematic Review. <i>CNS Drugs</i> . 2015;29(5):371-382.                                                                                                                                    |
| Walker L, Pirmohamed M, Marson AG. Immunomodulatory interventions for focal epilepsy syndromes. <i>Cochrane Database of Systematic Reviews</i> . 2013(6).                                                                                                                                    |
| Trinka E, Hofler J, Zerbs A, Brigo F. Efficacy and safety of intravenous valproate for status epilepticus: a systematic review. <i>CNS Drugs</i> . 2014;28(7):623-639.                                                                                                                       |
| Tellez-Zenteno JF, Dhar R, Wiebe S. Long-term seizure outcomes following epilepsy surgery: a systematic review and meta-analysis. <i>Brain</i> . 2005;128(Pt 5):1188-1198.                                                                                                                   |
| Strzelczyk A, Zollner JP, Willems LM, et al. Lacosamide in status epilepticus: Systematic review of current evidence. <i>Epilepsia</i> . 2017;58(6):933-950.                                                                                                                                 |
| Stockings E, Zagic D, Campbell G, et al. Evidence for cannabis and cannabinoids for epilepsy: A systematic review of controlled and observational evidence. <i>Journal of Neurology, Neurosurgery and Psychiatry</i> . 2018;89(7):741-753.                                                   |
| Somale AK, Kondekar SV. Ketogenic diet as an effective alternative therapy in childhood refractory epilepsy: A systematic review. <i>Epilepsia.Conference:10th European Congress on Epileptology</i> . London United Kingdom. Conference Publication: (var.pagings). 53 (SUPPL. 15) (pp 17). |
| Sofou K, Kristjansdottir R, Papachatzakis NE, Ahmadzadeh A, Uvebrant P. Management of prolonged seizures and status epilepticus in childhood: a systematic review. <i>Journal of Child Neurology</i> . 2009;24(8):918-926.                                                                   |
| Singh L, Kondekar A. Lowglycemic index diet for the treatment of refractory epilepsy in children and young adults: A systematic review of efficacy. <i>Epilepsia.Conference:12th European Congress on Epileptology</i> . Czech Republic. 57 (Supplement 12) (pp 149).                        |
| Shih JJ, Ochoa JG. A systematic review of antiepileptic drug initiation and withdrawal. <i>Neurologist</i> . 2009;15(3):122-131.                                                                                                                                                             |
| Sherman EM, Wiebe S, Fay-McClymont TB, et al. Neuropsychological outcomes after epilepsy surgery: systematic review and pooled estimates. <i>Epilepsia</i> . 2011;52(5):857-869.                                                                                                             |
| Saconato H, Prado GF, Puga ME, Atallah AN. Oxcarbazepine for refractory epilepsy: systematic review of the literature. <i>Sao Paulo Medical Journal = Revista Paulista de Medicina</i> . 2009;127(3):150-159.                                                                                |
| Rheims S, Perucca E, Cucherat M, Ryvlin P. Factors determining response to antiepileptic drugs in randomized controlled trials. A systematic review and meta-analysis. <i>Epilepsia</i> . 2011;52(2):219-233.                                                                                |
| Rheims S, Cucherat M, Arzimanoglou A, Ryvlin P. Greater response to placebo in children than in adults: a systematic review and meta-analysis in drug-resistant partial epilepsy. <i>PLoS Medicine / Public Library of Science</i> . 2008;5(8):e166.                                         |
| Reilly C, Baldeweg T, Stewart N, et al. Do behavior and emotions improve after pediatric epilepsy surgery? A systematic review. <i>Epilepsia</i> . 2019;60(5):885-897.                                                                                                                       |
| Puka K, Tavares TP, Anderson KK, Ferro MA, Speechley KN. A systematic review of quality of life in parents of children with epilepsy. <i>Epilepsy &amp; Behavior</i> . 2018;82:38-45.                                                                                                        |
| Posner EB, Mohamed K, Marson AG. A systematic review of treatment of typical absence seizures in children and adolescents with ethosuximide, sodium valproate or lamotrigine. <i>Seizure</i> . 2005;14(2):117-122.                                                                           |
| Poelzer K, Mannion C, Ortiz MM, Bang R, Woods P. A systematic review of the quality of life for families supporting a child consuming the ketogenic diet for seizure reduction. <i>Current Developments in Nutrition</i> . 2019;3(5).                                                        |
| Plevin D, Jureidini J, Howell S, Smith N. Paediatric antiepileptic polytherapy: systematic review of efficacy and neurobehavioural effects and a tertiary centre experience. <i>Acta Paediatrica</i> . 2018;107(9):1587-1593.                                                                |

|                                                                                                                                                                                                                                                                         |
|-------------------------------------------------------------------------------------------------------------------------------------------------------------------------------------------------------------------------------------------------------------------------|
| Pal DK. Phenobarbital for childhood epilepsy: Systematic review. <i>Paediatric and Perinatal Drug Therapy</i> . 2006;7(1):31-42.                                                                                                                                        |
| O'Toole S, Benson A, Lambert V, Gallagher P, Shahwan A, Austin JK. Family communication in the context of pediatric epilepsy: A systematic review. <i>Epilepsy &amp; Behavior</i> . 2015;51:225-239.                                                                    |
| Ortiz de la Rosa JS, Ladino LD, Rodriguez PJ, Rueda MC, Polania JP, Castaneda AC. Efficacy of lacosamide in children and adolescents with drug-resistant epilepsy and refractory status epilepticus: A systematic review. <i>Seizure</i> . 2018;56:34-40.               |
| Mbuba CK, Ngugi AK, Newton CR, Carter JA. The epilepsy treatment gap in developing countries: A systematic review of the magnitude, causes, and intervention strategies. <i>Epilepsia</i> . 2008;49(9):1491-1503.                                                       |
| Marson AG, Kadir ZA, Hutton JL, Chadwick DW. The new antiepileptic drugs: a systematic review of their efficacy and tolerability. <i>Epilepsia</i> . 1997;38(8):859-880.                                                                                                |
| Macrodimitris S, Sherman EM, Forde S, et al. Psychiatric outcomes of epilepsy surgery: a systematic review. <i>Epilepsia</i> . 2011;52(5):880-890.                                                                                                                      |
| Mac TL, Tran DS, Quet F, Odermatt P, Preux PM, Tan CT. Epidemiology, aetiology, and clinical management of epilepsy in Asia: a systematic review. <i>Lancet Neurology</i> . 2007;6(6):533-543.                                                                          |
| Liu YT, Zhang LL, Huang L, Zeng LN. [Lamotrigine monotherapy in children with epilepsy: a systematic review]. <i>Zhongguo Dangdai Erke Zazhi</i> . 2016;18(7):582-588.                                                                                                  |
| Lewis SA, Noyes J, Mackereth S. Knowledge and information needs of young people with epilepsy and their parents: Mixed-method systematic review. <i>BMC Pediatrics</i> . 2010;10:103.                                                                                   |
| Lewis SA, Noyes J, Hastings RP. Systematic review of epilepsy self-management interventions integrated with a synthesis of children and young people's views and experiences. <i>Journal of Advanced Nursing</i> . 2015;71(3):478-497.                                  |
| Lau Moon Lin M, Robinson PD, Flank J, Sung L, Dupuis LL. The Safety of Prochlorperazine in Children: A Systematic Review and Meta-Analysis. <i>Drug Safety</i> . 2016;39(6):509-516.                                                                                    |
| Lattanzi S, Brigo F, Trinka E, et al. Efficacy and Safety of Cannabidiol in Epilepsy: A Systematic Review and Meta-Analysis. <i>Drugs</i> . 2018;78(17):1791-1804.                                                                                                      |
| Lattanzi S, Brigo F, Grillo E, et al. Adjunctive Eslicarbapazine Acetate in Pediatric Patients with Focal Epilepsy: A Systematic Review and Meta-Analysis. <i>CNS Drugs</i> . 2018;32(3):189-196.                                                                       |
| Kee VR, Gilchrist B, Granner MA, Sarrazin NR, Carnahan RM. A systematic review of validated methods for identifying seizures, convulsions, or epilepsy using administrative and claims data. <i>Pharmacoepidemiology and Drug Safety</i> . 2012;21(S1):183-193.         |
| Kaddumukasa M, Kaddumukasa MN, Buwembo W, et al. Epilepsy misconceptions and stigma reduction interventions in sub-Saharan Africa, a systematic review. <i>Epilepsy &amp; Behavior</i> . 2018;85:21-27.                                                                 |
| Jones C, Reilly C. Parental anxiety in childhood epilepsy: A systematic review. <i>Epilepsia</i> . 2016;57(4):529-537.                                                                                                                                                  |
| Jones C, Atkinson P, Helen Cross J, Reilly C. Knowledge of and attitudes towards epilepsy among teachers: A systematic review. <i>Epilepsy &amp; Behavior</i> . 2018;87:59-68.                                                                                          |
| Jain P, Sharma S, Dua T, Barbui C, Das RR, Aneja S. Efficacy and safety of anti-epileptic drugs in patients with active convulsive seizures when no IV access is available: Systematic review and meta-analysis. <i>Epilepsy Research</i> . 2016;122:47-55.             |
| Hu XY, Trevelyan E, Chai QY, et al. Effectiveness and safety of using acupoint Shui Gou (GV 26): A systematic review and meta-analysis of randomized controlled trials. <i>Acupuncture and Related Therapies</i> 3 (1) (pp 1-10), 2015.Date of Publication:February 01. |
| Hellström-Westas L, Boylan G, Ågren J. Systematic review of neonatal seizure management strategies provides guidance on anti-epileptic treatment. <i>Acta Paediatrica</i> . 2015;104(2):123-129.                                                                        |

|                                                                                                                                                                                                                                                                                                                                       |
|---------------------------------------------------------------------------------------------------------------------------------------------------------------------------------------------------------------------------------------------------------------------------------------------------------------------------------------|
| Haut SR, Seinfeld S, Pellock J. Benzodiazepine use in seizure emergencies: A systematic review. <i>Epilepsy &amp; Behavior</i> . 2016;63:109-117.                                                                                                                                                                                     |
| Harden J, Black R, Chin RFM. Families' experiences of living with pediatric epilepsy: A qualitative systematic review. <i>Epilepsy &amp; Behavior</i> . 2016;60:225-237.                                                                                                                                                              |
| Hamiwka L, Macrodimitris S, Tellez-Zenteno JF, et al. Social outcomes after temporal or extratemporal epilepsy surgery: A systematic review. <i>Epilepsia</i> . 2011.                                                                                                                                                                 |
| Halma E, de Louw AJ, Klinkenberg S, Aldenkamp AP, DM IJ, Majoie M. Behavioral side-effects of levetiracetam in children with epilepsy: a systematic review. <i>Seizure</i> . 2014;23(9):685-691.                                                                                                                                      |
| Hader WJ, Tellez-Zenteno J, Metcalfe A, et al. Complications of epilepsy surgery: a systematic review of focal surgical resections and invasive EEG monitoring. <i>Epilepsia</i> . 2013;54(5):840-847.                                                                                                                                |
| Gogou M, Haidopoulou K, Eboriadou M, Pavlou E. Sleep apneas and epilepsy comorbidity in childhood: a systematic review of the literature. <i>Sleep &amp; Breathing</i> . 2015;19(2):421-432.                                                                                                                                          |
| Giorelli AS, Passos P, Carnaval T, Gomes MDM. Excessive daytime sleepiness and epilepsy: A systematic review. <i>Epilepsy Research and Treatment</i> . 2013(pagination).                                                                                                                                                              |
| Garcia Pierce J, Aronoff S, Del Vecchio M. Systematic Review and Meta-analysis of Seizure Recurrence After a First Unprovoked Seizure in 815 Neurologically and Developmentally Normal Children. <i>Journal of Child Neurology</i> . 2017;32(13):1035-1039.                                                                           |
| Flint AE, Waterman M, Bowmer G, Vadlamani G, Chumas P, Morrall M. Neuropsychological outcomes following paediatric temporal lobe surgery for epilepsies: Evidence from a systematic review. <i>Seizure</i> . 2017;52:89-116.                                                                                                          |
| Ferro MA, Ferro AL, Boyle MH. A systematic review of self-concept in adolescents with epilepsy. <i>Journal of Pediatric Psychology</i> . 2012;37(9):945-958.                                                                                                                                                                          |
| Englot DJ, Rolston JD, Wang DD, Sun PP, Chang EF, Auguste KI. Seizure outcomes after temporal lobectomy in pediatric patients: A systematic review. <i>Journal of Neurosurgery: Pediatrics</i> . 2013;12(2):134-141.                                                                                                                  |
| Englot DJ, Breshears JD, Sun PP, Chang EF, Auguste KI. Seizure outcomes after resective surgery for extra-temporal lobe epilepsy in pediatric patients: A systematic review. <i>Journal of Neurosurgery: Pediatrics</i> . 2013;12(2):126-133.                                                                                         |
| Egunsola O, Choonara I, Sammons HM. Anti-epileptic drug utilisation in paediatrics: A systematic review. <i>BMJ Paediatrics Open</i> . 2017;1(1).                                                                                                                                                                                     |
| Egunsola O, Choonara I, Sammons HM. Safety of Levetiracetam in Paediatrics: A Systematic Review. <i>PLoS ONE [Electronic Resource]</i> . 2016;11(3):e0149686.                                                                                                                                                                         |
| Doshi D. Controlling seizures in children: Diazepam or midazolam? Systematic review. <i>Hong Kong Journal of Emergency Medicine</i> . 2010;17(2):196-204.                                                                                                                                                                             |
| Dhaliwal H, Macrodimitris S, Wiebe S, et al. Quality of life outcome after temporal or extra-temporal epilepsy surgery: A systematic review. <i>Epilepsia</i> . Conference: 2009 Annual Meeting of the American Epilepsy Society. Boston, MA United States. Conference Publication: (var.pagings). 2050 (SUPPL. 2011) (pp 2454-2455). |
| Crudgington H, Rogers M, Bray L, et al. Core Health Outcomes in Childhood Epilepsy (CHOICE): Development of a core outcome set using systematic review methods and a Delphi survey consensus. <i>Epilepsia</i> . 2019;60(5):857-871.                                                                                                  |
| Corrigan FM, Broome H, Dorris L. A systematic review of psychosocial interventions for children and young people with epilepsy. <i>Epilepsy &amp; Behavior</i> . 2016;56:99-112.                                                                                                                                                      |
| Cooper YA, Pianka ST, Alotaibi NM, et al. Repetitive transcranial magnetic stimulation for the treatment of drug-resistant epilepsy: A systematic review and individual participant data meta-analysis of real-world evidence. <i>Epilepsia Open</i> . 2018;3(1):55-65.                                                               |

|                                                                                                                                                                                                                                                                                                                                          |
|------------------------------------------------------------------------------------------------------------------------------------------------------------------------------------------------------------------------------------------------------------------------------------------------------------------------------------------|
| Cao K, Liu M, Wang C, et al. Five-Year Long-Term Prognosis of Epileptic Children After Hemispheric Surgery: A Systematic Review and Meta-analysis. <i>Medicine</i> . 2016;95(23):e3743.                                                                                                                                                  |
| Cao J, Lin XX, Ma XM, Liu H. The efficacy and safety of lamotrigine for absence seizures in children and adolescents: A systematic review and meta-analysis. <i>Journal of Clinical Neuroscience</i> . 2019.                                                                                                                             |
| Campos MS, Ayres LR, Morelo MR, Marques FA, Pereira LR. Efficacy and Tolerability of Antiepileptic Drugs in Patients with Focal Epilepsy: Systematic Review and Network Meta-analyses. <i>Pharmacotherapy: The Journal of Human Pharmacology &amp; Drug Therapy</i> . 2016;36(12):1255-1271.                                             |
| Cai QY, Zhou ZJ, Luo R, et al. Safety and tolerability of the ketogenic diet used for the treatment of refractory childhood epilepsy: a systematic review of published prospective studies. <i>World Journal of Pediatrics</i> . 2017;13(6):528-536.                                                                                     |
| Burneo JG, Jette N, Theodore W, et al. Disparities in epilepsy: report of a systematic review by the North American Commission of the International League Against Epilepsy. <i>Epilepsia</i> . 2009;50(10):2285-2295.                                                                                                                   |
| Brigo F, Storti M, Del Felice A, Fiaschi A, Bongiovanni LG. IV Valproate in generalized convulsive status epilepticus: a systematic review. <i>European Journal of Neurology</i> . 2012;19(9):1180-1191.                                                                                                                                 |
| Brigo F, Storti M, Benedetti MD, et al. Resting motor threshold in idiopathic generalized epilepsies: a systematic review with meta-analysis. <i>Epilepsy Research</i> . 2012;101(1-2):3-13.                                                                                                                                             |
| Brigo F, Nardone R, Tezzon F, Trinka E. Nonintravenous midazolam versus intravenous or rectal diazepam for the treatment of early status epilepticus: A systematic review with meta-analysis. <i>Epilepsy &amp; Behavior</i> . 2015;49:325-336.                                                                                          |
| Brackney DE, Brooks JL. Complementary and Alternative Medicine: The Mozart Effect on Childhood Epilepsy-A Systematic Review. <i>Journal of School Nursing</i> . 2018;34(1):28-37.                                                                                                                                                        |
| Bonnett LJ, Shukralla A, Tudur-Smith C, Williamson PR, Marson AG. Seizure recurrence after antiepileptic drug withdrawal and the implications for driving: further results from the MRC Antiepileptic Drug Withdrawal Study and a systematic review. <i>Journal of Neurology, Neurosurgery &amp; Psychiatry</i> . 2011;82(12):1328-1333. |
| Beyenburg S, Stavem K, Schmidt D. Placebo-corrected efficacy of modern antiepileptic drugs for refractory epilepsy: Systematic review and meta-analysis. <i>Epilepsia</i> . 2010;51(1):7-26.                                                                                                                                             |
| Benson A, O'Toole S, Lambert V, Gallagher P, Shahwan A, Austin JK. To tell or not to tell: A systematic review of the disclosure practices of children living with epilepsy and their parents. <i>Epilepsy &amp; Behavior</i> . 2015;51:73-95.                                                                                           |
| Beh SMJ, Cook MJ, D'Souza WJ. Isolated amygdala enlargement in temporal lobe epilepsy: A systematic review. <i>Epilepsy &amp; Behavior</i> . 2016;60:33-41.                                                                                                                                                                              |
| Baker GA, Hesdon B, Marson AG. Quality-of-life and behavioral outcome measures in randomized controlled trials of antiepileptic drugs: a systematic review of methodology and reporting standards. <i>Epilepsia</i> . 2000;41(11):1357-1363.                                                                                             |
| Arya R, Holland KD. In response to comments on Adverse events related to extraoperative invasive EEG monitoring with subdural grid electrodes: A systematic review and meta-analysis. <i>Epilepsia</i> . 2014;55(1):195-196.                                                                                                             |
| Arya R, Glauser TA. Pharmacotherapy of focal epilepsy in children: a systematic review of approved agents. <i>CNS Drugs</i> . 2013;27(4):273-286.                                                                                                                                                                                        |
| Anderson M, Choonara I. A systematic review of safety monitoring and drug toxicity in published randomised controlled trials of antiepileptic drugs in children over a 10-year period. <i>Archives of Disease in Childhood</i> . 2010;95(9):731-738.                                                                                     |
| Alyahya B, Friesen M, Nauche B, Laliberte M. Acute lamotrigine overdose: a systematic review of published adult and pediatric cases. <i>Clinical Toxicology</i> . 2018;56(2):81-89.                                                                                                                                                      |
| Adair B, Ullenhag A, Keen D, Granlund M, Imms C. The effect of interventions aimed at improving participation outcomes for children with disabilities: a systematic review. <i>Developmental Medicine &amp; Child Neurology</i> . 2015;57(12):1093-1104.                                                                                 |

|                                                                                                                                                                                                                                                                                                                                                                                                                                                                  |
|------------------------------------------------------------------------------------------------------------------------------------------------------------------------------------------------------------------------------------------------------------------------------------------------------------------------------------------------------------------------------------------------------------------------------------------------------------------|
| Waschik P, Zollner JP, Willems LM, et al. Systematic review of lacosamide for treatment of status epilepticus in children and adults. Zeitschrift fur Epileptologie.Conference:Jahrestagung der Deutschen und Osterreichischen Gesellschaften fur Epileptologie und der Schweizerischen Epilepsie-Liga 2017. Austria. 2030 (2011 Supplement 2011) (pp S2024-S2025).                                                                                              |
| Van Den Munckhof B, Van Dee V, Liukkonen E, et al. Treatment of electrical status epilepticus in sleep (ESES): A systematic review and meta-analysis. European Journal of Paediatric Neurology.Conference:10th European Paediatric Neurology Society Congress, EPNS 2013. Brussels Belgium. Conference Publication: (var.pagings). 2017 (SUPPL. 2011) (pp S2028).                                                                                                |
| Tellez-Zenteno JF, Hernandez Ronquillo L, Moien-Afshari F, Wiebe S. Surgical outcomes in lesional and non-lesional epilepsy: a systematic review and meta-analysis. Epilepsy Research. 2010;89(2-3):310-318.                                                                                                                                                                                                                                                     |
| Stevanovic D, Tadic I, Novakovic T. The predictors of health-related quality of life in pediatric epilepsy: A systematic review. Value in Health.Conference:ISPOR 14th Annual European Congress. Madrid Spain. Conference Publication: (var.pagings). 14 (17) (pp A327).                                                                                                                                                                                         |
| Seinfeld S, Pellock JM. Efficacy and safety of intranasal midazolam for seizure emergencies in pediatric patients: A systematic review of the literature. Annals of Neurology.Conference:42nd Annual Meeting of the Child Neurology Society. Austin, TX United States. Conference Publication: (var.pagings). 74 (SUPPL. 17) (pp S158).                                                                                                                          |
| Pellock J, Carman W, Thyagarajan V, Daniels T, Morris D, D'Cruz O. Determining antiepileptic drug efficacy in pediatric patients: Results from a systematic review of clinical trials in adults compared to children. Neurology.Conference:64th American Academy of Neurology Annual Meeting. New Orleans, LA United States. Conference Publication: (var.pagings). 78 (61 Meeting Abstract) (no pagination).                                                    |
| Kahana-Levy N, Benifla M. Memory performance following surgery in pediatric patients with temporal lobe epilepsy: A systematic review and meta-analysis. Epilepsia.Conference:13th European Congress on Epileptology. Austria. 59 (Supplement 13) (pp S135).                                                                                                                                                                                                     |
| Fletcher ML, Sarangarm P, Smolinske S, et al. A systematic review of second-line therapies in toxic seizures. Clinical Toxicology.Conference:North American Congress of Clinical Toxicology, NACCT 2019. United States. 2057 (2010) (pp 2928).                                                                                                                                                                                                                   |
| Fiest KM, Dykeman J, Liu XR, Patten S, Jette N, Wiebe S. Satisfaction with epilepsy treatment in patients with epilepsy: A systematic review. Epilepsy Currents.Conference:2012 Annual Meeting of the American Epilepsy Society, AES 2012. San Diego, CA United States. Conference Publication: (var.pagings). 2013 (SUPPL. 2011) (pp 2272).                                                                                                                     |
| Fay TB, Hader WJ, Mohamed IS, Sherman ES. Systematic review and case series of neuropsychological outcomes after epilepsy surgery in children with dysembryoplastic neuroepithelial tumours (DNET). Epilepsy Currents.Conference:64th Annual Meeting of the American Epilepsy Society, AES and 63rd Biennial North American Regional Epilepsy Congress. San Antonio, TX United States. Conference Publication: (var.pagings). 11 (61 SUPPL. 61) (no pagination). |
| Duff E, Ferrie C, Gayatri N, Morrall MCHJ. Management of paediatric non-epileptic seizures: Evidence from a systematic review. Developmental Medicine and Child Neurology.Conference:Annual Meeting of the British Paediatric Neurology Association 2012. London United Kingdom. Conference Publication: (var.pagings). 2054 (SUPPL.2011) (pp 2070-2071).                                                                                                        |
| D'Cruz O, Carman W, Thyagarajan V, Daniels T, Morris D, Pellock JM. Efficacy of AEDs in adults predicts efficacy in pediatric patients: Results from a systematic review of published clinical trials. Epilepsy Currents.Conference:65th Annual Meeting of the American Epilepsy Society, AES. Baltimore, MD United States. Conference Publication: (var.pagings). 12 (61 SUPPL. 61) (no pagination).                                                            |
| Dai J, Han L, Wang L, Zhang LL. [Levetiracetam therapy for childhood epilepsy: a systematic review]. Zhongguo Dangdai Erke Zazhi. 2010;12(2):128-131.                                                                                                                                                                                                                                                                                                            |

|                                                                                                                                                                                                                                                                                                                                                                                                              |
|--------------------------------------------------------------------------------------------------------------------------------------------------------------------------------------------------------------------------------------------------------------------------------------------------------------------------------------------------------------------------------------------------------------|
| Collinge S, Prendergast G, Ferrie C, Gayatri N, Morrall MCHJ. Advanced functional neuro-imaging for paediatric epilepsy surgery candidates: Evidence from a systematic review. <i>Developmental Medicine and Child Neurology</i> .Conference:Annual Meeting of the British Paediatric Neurology Association 2012. London United Kingdom. Conference Publication: (var.pagings). 2054 (SUPPL.2011) (pp 2062). |
| Chong L, Jamieson NJ, Gill D, et al. Children's Experiences of Epilepsy: A Systematic Review of Qualitative Studies. <i>Pediatrics</i> . 2016;138(3):09.                                                                                                                                                                                                                                                     |
| Brigo F, Rohrachner A, Dibue-Adjei M, Yamamoto T, Vonck K, Trinka E. Vagus nerve stimulation in refractory and super-refractory status epilepticus-a systematic review. <i>Epilepsia</i> .Conference:13th European Congress on Epileptology. Austria. 59 (Supplement 13) (pp S320).                                                                                                                          |
| Alyahya B, Friesen M, Nauche B, Laliberte M. Systematic review of adult and pediatric lamotrigine overdose. <i>Journal of Medical Toxicology</i> .Conference:2017 Annual Scientific Meeting of the American College of Medical Toxicology, ACMT. Puerto Rico. 2013 (2011) (pp 2042).                                                                                                                         |
| Abulaban A, Alshehri A, Kojan S, Bokhari R. Intravenous versus non-intravenous benzodiazepines for the treatment of status epilepticus: A systematic review and meta-analysis. <i>Neurology</i> .Conference:66th American Academy of Neurology Annual Meeting, AAN 2014. Philadelphia, PA United States. Conference Publication: (var.pagings). 2082 (2010 SUPPL. 2011) (no pagination).                     |
| <b>Cancer</b>                                                                                                                                                                                                                                                                                                                                                                                                |
| Akimoto T, Zenda S, Nakamura N, et al. A retrospective multi-institutional study of proton beam therapy for head and neck cancer with non-squamous cell histologies. <i>International Journal of Radiation Oncology</i> .Conference:58th Annual Meeting of the American Society for Radiation Oncology, ASTRO 2016. United States. 2096 (2012 Supplement 2011) (pp E2337).                                   |
| Allen JD, Coronado GD, Williams RS, et al. A systematic review of measures used in studies of human papillomavirus (HPV) vaccine acceptability. <i>Vaccine</i> . 4027;28(24):4027-4037.                                                                                                                                                                                                                      |
| Anschau F, Webster J, Capra MEZ, de Azeredo da Silva ALF, Stein AT. Efficacy of low-level laser for treatment of cancer oral mucositis: a systematic review and meta-analysis. <i>Lasers in Medical Science</i> . 2019;34(6):1053-1062.                                                                                                                                                                      |
| Arumugam S, Manning-Cork NJ, Gains JE, Boterberg T, Gaze MN. The Evidence for External Beam Radiotherapy in High-Risk Neuroblastoma of Childhood: A Systematic Review. <i>Clinical Oncology</i> . 2019;31(3):182-190.                                                                                                                                                                                        |
| Ashfaq K, Yahaya I, Hyde C, et al. Clinical effectiveness and cost-effectiveness of stem cell transplantation in the management of acute leukaemia : A systematic review. <i>Health Technology Assessment</i> . 2010;14(54):1-172.                                                                                                                                                                           |
| Balzer BWR, Cherepanoff S, Joshua AM, Giblin M, Conway RM, Anazodo AC. Conjunctival Melanoma in Childhood and Adolescence: A Systematic Review. <i>Ocular Oncology and Pathology</i> . 2019.                                                                                                                                                                                                                 |
| Baradaran Noveiry B, Hirbod-Mobarakeh A, Khalili N, et al. Specific immunotherapy in hepatocellular cancer: A systematic review. <i>Journal of Gastroenterology and Hepatology</i> . 2017;32(2):339-351.                                                                                                                                                                                                     |
| Barlow JH, Ellard DR. Psycho-educational interventions for children with chronic disease, parents and siblings: an overview of the research evidence base. <i>Child: Care, Health and Development</i> . 2004;30(6):637-645.                                                                                                                                                                                  |
| Barnett M, McDonnell G, DeRosa A, et al. Psychosocial outcomes and interventions among cancer survivors diagnosed during adolescence and young adulthood (AYA): a systematic review. <i>Journal of Cancer Survivorship</i> . 2016;10(5):814-831.                                                                                                                                                             |
| Baumann FT, Bloch W, Beulertz J. Clinical exercise interventions in pediatric oncology: A systematic review. <i>Pediatric Research</i> . 2013;74(4):366-374.                                                                                                                                                                                                                                                 |
| Bautista F, Fioravanti V, de Rojas T, et al. Medulloblastoma in children and adolescents: a systematic review of contemporary phase I and II clinical trials and biology update. <i>Cancer Medicine</i> . 2017;6(11):2606-2624.                                                                                                                                                                              |

|                                                                                                                                                                                                                                                                                  |
|----------------------------------------------------------------------------------------------------------------------------------------------------------------------------------------------------------------------------------------------------------------------------------|
| Bekkering WP, Vliet Vlieland TP, Fiocco M, et al. Quality of life, functional ability and physical activity after different surgical interventions for bone cancer of the leg: A systematic review. <i>Surgical Oncology</i> . 2012;21(2):e39-47.                                |
| Beyer S, Von Bueren AO, Klautke G, et al. A systematic review on the characteristics, treatments and outcomes of the patients with primary spinal glioblastomas or gliosarcomas reported in literature until March 2015. <i>PLoS ONE</i> . 2016;11(2).                           |
| Bhardwaj T, Koffman J. Non-pharmacological interventions for management of fatigue among children with cancer: systematic review of existing practices and their effectiveness. <i>BMJ supportive &amp; palliative care</i> . 2017;7(4):404-414.                                 |
| Bjelakovic G, Nikolova D, Simonetti RG, Gluud C. Systematic review: primary and secondary prevention of gastrointestinal cancers with antioxidant supplements. <i>Alimentary Pharmacology &amp; Therapeutics</i> . 2008;28(6):689-703.                                           |
| Bradford NK, Chan RJ. Health promotion and psychological interventions for adolescent and young adult cancer survivors: A systematic literature review. <i>Cancer Treatment Reviews</i> . 2017;55(pp 57-70).                                                                     |
| Bradt J, Dileo C, Magill L, Teague A. Music interventions for improving psychological and physical outcomes in cancer patients. <i>Cochrane Database of Systematic Reviews</i> . 2016(8).                                                                                        |
| Brand NR, Qu LG, Chao A, Ilbawi AM. Delays and Barriers to Cancer Care in Low- and Middle-Income Countries: A Systematic Review. <i>Oncologist</i> . 2019.                                                                                                                       |
| Bredlau AL, Thakur R, Korones DN, Dworkin RH. Ketamine for pain in adults and children with cancer: a systematic review and synthesis of the literature. <i>Pain Medicine</i> . 2013;14(10):1505-1517.                                                                           |
| Brennan-Jones CG, McMahan C, Van Dalen EC. Cochrane corner: platinum-induced hearing loss after treatment for childhood cancer. <i>International journal of audiology</i> . 2019;58(4):181-184.                                                                                  |
| Brier MJ, Schwartz LA, Kazak AE. Psychosocial, health-promotion, and neurocognitive interventions for survivors of childhood cancer: A systematic review. <i>Health Psychology</i> . 2015;34(2):130-148.                                                                         |
| Buffart LM, van Uffelen JGZ, Riphagen II, et al. Physical and psychosocial benefits of yoga in cancer patients and survivors, a systematic review and meta-analysis of randomized controlled trials. <i>BMC Cancer</i> . 2012;12(no pagination).                                 |
| Chan DL, Alzahrani NA, Morris DL, Chua TC. Systematic review of efficacy and outcomes of salvage liver transplantation after primary hepatic resection for hepatocellular carcinoma. <i>Journal of Gastroenterology and Hepatology</i> . 2014;29(1):31-41.                       |
| Chan DL, Morris DL, Chua TC. Clinical efficacy and predictors of outcomes of repeat hepatectomy for recurrent hepatocellular carcinoma-A systematic review. <i>Surgical Oncology</i> . 2013;22(2):e23-e30.                                                                       |
| Chang CW, Mu PF, Jou ST, Wong TT, Chen YC. Systematic review and meta-analysis of nonpharmacological interventions for fatigue in children and adolescents with cancer. <i>Worldviews on Evidence-Based Nursing</i> . 2013;10(4):208-217.                                        |
| Changizi M, Kaveh MH, Jouybari TA, Hosseini MS. The role of health education in cancer prevention: A systematic review. <i>International Journal of Pharmacy and Technology</i> . 2016;8(4):24082-24099.                                                                         |
| Cheuk DKL, Chiang AKS, Chan GCF, Ha SY. Urate oxidase for the prevention and treatment of tumour lysis syndrome in children with cancer. <i>Cochrane Database of Systematic Reviews</i> . 2017(3).                                                                               |
| Cheung YT, Krull KR. Neurocognitive outcomes in long-term survivors of childhood acute lymphoblastic leukemia treated on contemporary treatment protocols: A systematic review. <i>Neuroscience and Biobehavioral Reviews</i> 53 (pp 108-120), 2015.Date of Publication:June 01. |
| Chow E, Tsao MN, Harth T. Does psychosocial intervention improve survival in cancer? A meta-analysis. <i>Palliative Medicine</i> . 2004;18(1):25-31.                                                                                                                             |
| Clark AJ, Cage TA, Aranda D, et al. A systematic review of the results of surgery and radiotherapy on tumor control for pediatric craniopharyngioma. <i>Child's Nervous System</i> . 2013;29(2):231-238.                                                                         |

|                                                                                                                                                                                                                                                                                                                                                                              |
|------------------------------------------------------------------------------------------------------------------------------------------------------------------------------------------------------------------------------------------------------------------------------------------------------------------------------------------------------------------------------|
| Cohen JW, Akshintala S, Kane E, Steinberg SM, Widemann BC, Shah NN. Systematic review of pediatric oncology phase I trials: Toxicity and outcomes in the era of targeted therapies. <i>Journal of Clinical Oncology</i> .Conference:2018 Annual Meeting of the American Society of Clinical Oncology, ASCO 2018. United States. 2036 (2015 Supplement 2011) (no pagination). |
| Coughtrey A, Millington A, Bennett S, et al. The Effectiveness of Psychosocial Interventions for Psychological Outcomes in Pediatric Oncology: A Systematic Review. <i>Journal of Pain &amp; Symptom Management</i> . 2018;55(3):1004-1017.                                                                                                                                  |
| Derman YE, Deatrick JA. Promotion of well-being during treatment for childhood cancer. <i>Cancer Nursing</i> . 2016;39(6):E1-E16.                                                                                                                                                                                                                                            |
| Dion GR, Teng S, Boyd LR, et al. Adjuvant human papillomavirus vaccination for secondary prevention: A systematic review. <i>JAMA Otolaryngology Head and Neck Surgery</i> . 2017;143(6):614-622.                                                                                                                                                                            |
| Flahault C, Desdouits J. Effects of family therapy on the communication of patient suffering from cancer and its family. <i>Asia-Pacific Journal of Clinical Oncology</i> .Conference: COSA 39th Annual Scientific Meeting and IPOS 14th World Congress of Psycho-Oncology. Brisbane, QLD Australia. Conference Publication: (var.pagings). 38 (SUPPL. 33) (pp 231).         |
| Forsythe A, Christian R. Effectiveness of prophylactic intravenous immunoglobulins in preventing infection in pediatric oncology patients: A systematic review protocol. <i>JBIC Database of Systematic Reviews and Implementation Reports</i> . 2016;14(12):48-55.                                                                                                          |
| Garcia X, Cuervo MI. Integration of Pediatric Palliative Care in Children with Cancer: A Systematic Review. <i>Journal of Pain and Symptom Management</i> .Conference:22nd International Congress on Palliative Care. Canada. 56 (26) (pp e129).                                                                                                                             |
| Hassan H, Rompola M, Glaser AW, Kinsey SE, Phillips RS. Systematic review and meta-analysis investigating the efficacy and safety of probiotics in people with cancer. <i>Supportive Care in Cancer</i> . 2018;26(8):2503-2509.                                                                                                                                              |
| Hentea C, Cheng ER, Bauer NS, Mueller EL. Parent-centered communication at time of pediatric cancer diagnosis: A systematic review. <i>Pediatric Blood &amp; Cancer</i> . 2018;65(8):e27070.                                                                                                                                                                                 |
| Herd F, Basta NO, McNally RJQ, Tweddle DA. A systematic review of re-induction chemotherapy for children with relapsed high-risk neuroblastoma. <i>European Journal of Cancer</i> . 2019;111(pp 50-58).                                                                                                                                                                      |
| Heywood R, McCarthy AL, Skinner TL. Efficacy of Exercise Interventions in Patients With Advanced Cancer: A Systematic Review. <i>Archives of Physical Medicine &amp; Rehabilitation</i> . 2018;99(12):2595-2620.                                                                                                                                                             |
| Hoeks MPA, Kranenburg FJ, Middelburg RA, van Kraaij MGJ, Zwaginga JJ. Impact of red blood cell transfusion strategies in haemato-oncological patients: a systematic review and meta-analysis. <i>British Journal of Haematology</i> . 2017;178(1):137-151.                                                                                                                   |
| Katz IT, Ware NC, Gray G, Haberer JE, Mellins CA, Bangsberg DR. Scaling up human papillomavirus vaccination: a conceptual framework of vaccine adherence. <i>Sexual Health</i> . 2010;7(3):279-286.                                                                                                                                                                          |
| Kazak AE, Abrams AN, Banks J, et al. Psychosocial Assessment as a Standard of Care in Pediatric Cancer. <i>Pediatric Blood &amp; Cancer</i> . 2015;62(S5):S426-S459.                                                                                                                                                                                                         |
| Keenan H, Koski-Klein A, Du Mosch M, et al. The effects of physical activity on quality of life in the pediatric oncology population: A systematic review. <i>Rehabilitation Oncology</i> .Conference:Oncology Platform and Poster Presentation, CSM 2019. United States. 2037 (2011) (pp E2014-E2015).                                                                      |
| Kelada L, Wakefield CE, Cruz Silva MC, Signorelli C. Camps for Children with Cancer and Their Families: A Systematic Review of Psychosocial and Physical Impacts. <i>Journal of developmental and behavioral pediatrics : JDBP</i> . 2019;25.                                                                                                                                |
| Kim KS, Loring S, Kwekkeboom K. Use of art making interventions for pain and quality of life among cancer patients: A systematic review. <i>Psycho-Oncology</i> .Conference:14th Annual Conference of the American Psychosocial Oncology Society, APOS 2017. United States. 2026 (Supplement 2011) (pp 2053).                                                                |
| Kruijsen-Jaarsma M, Revesz D, Bierings MB, Buffart LM, Takken T. Effects of exercise on immune function in patients with cancer: a systematic review. <i>Exercise Immunology Review</i> . 2013;19:120-143.                                                                                                                                                                   |



|                                                                                                                                                                                                                                                                                                                                            |
|--------------------------------------------------------------------------------------------------------------------------------------------------------------------------------------------------------------------------------------------------------------------------------------------------------------------------------------------|
| Kurt I, Tanriverdi M. New approaches of oncology rehabilitation in children: Technotherapy-systematic literature review. <i>Neuro-Oncology.Conference:18th International Symposium on Pediatric Neuro-Oncology, ISPNO 2018. United States. 2020 (Supplement 2012) (pp i2166).</i>                                                          |
| Law EF, Fisher E, Fales J, Noel M, Eccleston C. Systematic review and meta-analysis of parent and family-based interventions for children and adolescents with chronic medical conditions. <i>Journal of Pediatric Psychology. 2014;39(8):866-886.</i>                                                                                     |
| Lim NLY, Shorey S. Effectiveness of technology-based educational interventions on the empowerment related outcomes of children and young adults with cancer: A quantitative systematic review. <i>Journal of Advanced Nursing. 2019;75(10):2072-2084.</i>                                                                                  |
| Lin JS, Eder M, Weinmann S. Behavioral counseling to prevent skin cancer: a systematic review for the U.S. Preventive Services Task Force. <i>Annals of Internal Medicine. 2011;154(3):190-201.</i>                                                                                                                                        |
| Maruffi M, Sposto R, Oberley MJ, Kysh L, Orgel E. Therapy for children and adults with mixed phenotype acute leukemia: A systematic review and meta-analysis. <i>Leukemia. 1515;32(7):1515-1528.</i>                                                                                                                                       |
| Maruffi MA, Sposto R, Oberley MJ, Kysh L, Orgel E. Therapy for children and adults with EGIL-or WHO2008-defined mixed phenotype acute leukemia: A systematic review and meta-analysis. <i>Blood.Conference:59th Annual Meeting of the American Society of Hematology, ASH 2017. United States. 2130 (Supplement 2011) (no pagination).</i> |
| McDaid C, Hartley S, Bagnall AM, Ritchie G, Light K, Riemsma R. Systematic review of effectiveness of different treatments for childhood retinoblastoma. <i>Health Technology Assessment. 2005;9(48).</i>                                                                                                                                  |
| McGrady ME, Ryan JL, Gutiérrez-Colina AM, Fredericks EM, Towner EK, Pai ALH. The impact of effective paediatric adherence promotion interventions: systematic review and meta-analysis. <i>Child: Care, Health and Development. 2015;41(6):789-802.</i>                                                                                    |
| Meyler E, Guerin S, Kiernan G, Breatnach F. Review of family-based psychosocial interventions for childhood cancer. <i>Journal of Pediatric Psychology. 2010;35(10):1116-1132.</i>                                                                                                                                                         |
| Migliorati C, Hewson I, Lalla RV, et al. Systematic review of laser and other light therapy for the management of oral mucositis in cancer patients. <i>Supportive Care in Cancer. 2013;21(1):333-341.</i>                                                                                                                                 |
| Mills E, Wu P, Seely D, Guyatt G. Melatonin in the treatment of cancer: a systematic review of randomized controlled trials and meta-analysis. <i>Journal of Pineal Research. 2005;39(4):360-366.</i>                                                                                                                                      |
| Morales JS, Valenzuela PL, Rincon-Castaneda C, et al. Exercise training in childhood cancer: A systematic review and meta-analysis of randomized controlled trials. <i>Cancer Treatment Reviews. 2018;70:154-167.</i>                                                                                                                      |
| Morra ME, Kien ND, Elmarazy A, et al. Early vaccination protects against childhood leukemia: A systematic review and meta-analysis. <i>Scientific Reports. 2017;7(1):15986.</i>                                                                                                                                                            |
| Mullassery D, Farrelly P, Losty PD. Does aggressive surgical resection improve survival in advanced stage 3 and 4 neuroblastoma? A systematic review and meta-analysis. <i>Pediatric Hematology and Oncology. 2014;31(8):703-716.</i>                                                                                                      |
| Newell SA, Sanson-Fisher RW, Savolainen NJ. Systematic review of psychological therapies for cancer patients: overview and recommendations for future research. <i>Journal of the National Cancer Institute. 2002;94(8):558-584.</i>                                                                                                       |
| Nunns M, Mayhew D, Ford T, et al. Effectiveness of nonpharmacological interventions to reduce procedural anxiety in children and adolescents undergoing treatment for cancer: A systematic review and meta-analysis. <i>Psycho-Oncology. 2018;27(8):1889-1899.</i>                                                                         |
| O'Connor M, Halkett GK. A systematic review of interventions to reduce psychological distress in pediatric patients receiving radiation therapy. <i>Patient Education &amp; Counseling. 2019;102(2):275-283.</i>                                                                                                                           |
| Ostadhashemi L, Khankeh HR, Eghlima M, et al. Family-oriented psychosocial intervention in children with cancer: A systematic review. <i>Journal of Kermanshah University of Medical Sciences. 2016;20(2):43-50.</i>                                                                                                                       |

|                                                                                                                                                                                                                                                                                                                                                                                      |
|--------------------------------------------------------------------------------------------------------------------------------------------------------------------------------------------------------------------------------------------------------------------------------------------------------------------------------------------------------------------------------------|
| Peikert ML, Inhestern L, Bergelt C. Psychosocial interventions for rehabilitation and reintegration into daily life of pediatric cancer survivors and their families: A systematic review. PLoS ONE [Electronic Resource]. 2018;13(4):e0196151.                                                                                                                                      |
| Raber M, Swartz MC, Santa Maria D, et al. Parental involvement in exercise and diet interventions for childhood cancer survivors: a systematic review. Pediatric Research. 2016;80(3):338-346.                                                                                                                                                                                       |
| Raber M, Swartz MC, Santa Maria D, et al. Parental involvement in exercise and diet interventions for childhood cancer survivors: a systematic review. Pediatric Research. 2016;80(3):338-346.                                                                                                                                                                                       |
| Rabin BA, Glasgow RE, Kerner JF, Klump MP, Brownson RC. Dissemination and implementation research on community-based cancer prevention: a systematic review. American Journal of Preventive Medicine. 2010;38(4):443-456.                                                                                                                                                            |
| Ramelet AS, Wosinski J, Feltin E, Mabire C, Rapin J. A systematic review of the effectiveness of therapeutic education for children diagnosed with cancer and their families on behavioural and health-related outcomes. JBI Database of Systematic Reviews and Implementation Reports. 2013;11(1):213-259.                                                                          |
| Rane PB, Ajmera MR, Kelley G, Madhavan S, Sambamoorthi U. Use of antidepressants among individuals with cancer: A systematic review. Value in Health.Conference:17th Annual International Meeting of the International Society for Pharmacoeconomics and Outcomes Research, ISPOR 2012. Washington, DC United States. Conference Publication: (var.pagings). 2015 (2014) (pp A2228). |
| Rheingans JI. A systematic review of nonpharmacologic adjunctive therapies for symptom management in children with cancer. Journal of Pediatric Oncology Nursing. 2007;24(2):81-94.                                                                                                                                                                                                  |
| Richards S, Pui C-H, Gayon P, Group obotCALLC. Systematic review and meta-analysis of randomized trials of central nervous system directed therapy for childhood acute lymphoblastic leukemia. Pediatric Blood & Cancer. 2013;60(2):185-195.                                                                                                                                         |
| Richardson J, Smith JE, McCall G, Pilkington K. Hypnosis for procedure-related pain and distress in pediatric cancer patients: a systematic review of effectiveness and methodology related to hypnosis interventions. Journal of Pain & Symptom Management. 2006;31(1):70-84.                                                                                                       |
| RICHARDSON J, SMITH JE, MCCALL G, RICHARDSON A, PILKINGTON K, KIRSCH I. Hypnosis for nausea and vomiting in cancer chemotherapy: a systematic review of the research evidence. European Journal of Cancer Care. 2007;16(5):402-412.                                                                                                                                                  |
| Richter D, Koehler M, Friedrich M, Hilgendorf I, Mehnert A, Weisflog G. Psychosocial interventions for adolescents and young adult cancer patients: A systematic review and meta-analysis. Critical Reviews in Oncology-Hematology. 2015;95(3):370-386.                                                                                                                              |
| Robb SL, Hanson-Abromeit D. A review of supportive care interventions to manage distress in young children with cancer and parents. Cancer Nursing. 2014;37(4):E1-26.                                                                                                                                                                                                                |
| Robenshtok E, Gafter-Gvili A, Goldberg E, et al. Antifungal prophylaxis in cancer patients after chemotherapy or hematopoietic stem-cell transplantation: systematic review and meta-analysis. Journal of Clinical Oncology. 2007;25(34):5471-5489.                                                                                                                                  |
| Rodriguez-Mansilla J, Gonzalez-Sanchez B, Torres-Piles S, Martin JG, Jimenez-Palomares M, Bellino MN. Effects of the application of therapeutic massage in children with cancer: a systematic review. Revista Latino-Americana de Enfermagem. 2017;25:e2903.                                                                                                                         |
| Rustler V, Hagerty M, Daeggelmann J, Marjerrison S, Bloch W, Baumann FT. Exercise interventions for patients with pediatric cancer during inpatient acute care: A systematic review of literature. Pediatric Blood & Cancer. 2017;64(11):e26567.                                                                                                                                     |
| Ryan D, Chafe R, Hodgkinson K, Chan K, Stringer K, Moorehead P. Interventions to improve the aftercare of survivors of childhood cancer: A systematic review. Pediatric Hematology Oncology Journal. 2018;3(4):90-98.                                                                                                                                                                |
| Salena K, Diorio C, Ladas E, et al. Traditional and complementary medicine therapies used with curative intent in childhood cancer: A systematic review. Pediatric Blood and Cancer.Conference:48th Congress of the International Society of Paediatric Oncology, SIOP 2016. Ireland. 2063 (Supplement 2013) (pp S2230).                                                             |

|                                                                                                                                                                                                                                                                                                                                                                                                                                                                                                                         |
|-------------------------------------------------------------------------------------------------------------------------------------------------------------------------------------------------------------------------------------------------------------------------------------------------------------------------------------------------------------------------------------------------------------------------------------------------------------------------------------------------------------------------|
| Sansom-Daly UM, Peate M, Wakefield CE, Bryant RA, Cohn RJ. How to cope with being 'CUBED': A Systematic review of current psychological interventions for adolescents and young adults living with cancer, compared with the state of the art in other chronic illnesses. <i>Asia-Pacific Journal of Clinical Oncology</i> .Conference:37th Annual Scientific Meeting of the Clinical Oncological Society of Australia, COSA. Melbourne, VIC Australia. Conference Publication: (var.pagings). 36 (SUPPL. 33) (pp 201). |
| Sansom-Daly UM, Peate M, Wakefield CE, Bryant RA, Cohn RJ. A systematic review of psychological interventions for adolescents and young adults living with chronic illness. <i>Health Psychology</i> . 2012;31(3):380-393.                                                                                                                                                                                                                                                                                              |
| Saraiya M, Glanz K, Briss PA, et al. Interventions to prevent skin cancer by reducing exposure to ultraviolet radiation: a systematic review. <i>American Journal of Preventive Medicine</i> . 2004;27(5):422-466.                                                                                                                                                                                                                                                                                                      |
| Schmidt-Hansen M, Bromham N, Taubert M, Arnold S, Hilgart JS. Buprenorphine for treating cancer pain. <i>Cochrane Database of Systematic Reviews</i> . 2015(3).                                                                                                                                                                                                                                                                                                                                                         |
| Sebire NJ, Roebuck DJ. Pathological diagnosis of paediatric tumours from image-guided needle core biopsies: A systematic review. <i>Pediatric Radiology</i> . 2006;36(5):426-431.                                                                                                                                                                                                                                                                                                                                       |
| Seitz DCM, Besier T, Goldbeck L. Psychosocial interventions for adolescent cancer patients: a systematic review of the literature. <i>Psycho-Oncology</i> . 2009;18(7):683-690.                                                                                                                                                                                                                                                                                                                                         |
| Shaikh F, Nathan PC, Hale J, Uleryk E, Frazier L. Is there a role for carboplatin in the treatment of malignant germ cell tumors? A systematic review of adult and pediatric trials. <i>Pediatric Blood &amp; Cancer</i> . 2013;60(4):587-592.                                                                                                                                                                                                                                                                          |
| Sheng N, Ma J, Ding W, Zhang Y. Effects of caregiver-involved interventions on the quality of life of children and adolescents with chronic conditions and their caregivers: a systematic review and meta-analysis. <i>Quality of Life Research</i> . 2019;28(1):13-33.                                                                                                                                                                                                                                                 |
| Shepherd JP, Frampton GK, Harris P. Interventions for encouraging sexual behaviours intended to prevent cervical cancer. <i>Cochrane Database of Systematic Reviews</i> . 2011(4).                                                                                                                                                                                                                                                                                                                                      |
| Shimosato-Wada Y, Tanoshima R, Tujimoto S, et al. Is there difference between the survival rate and treatment related complications between peripheral blood stem cell transplantation and bone marrow transplantation for pediatric hematological malignancy?: Systematic review and meta-analysis. <i>Blood</i> .Conference:60th Annual Meeting of the American Society of Hematology, ASH 2018. United States. 2132 (Suppl. 2011) (no pagination).                                                                   |
| Sieswerda E, Kremer LC, Caron HN, van Dalen EC. The use of liposomal anthracycline analogues for childhood malignancies: A systematic review. <i>European Journal of Cancer</i> . 2011;47(13):2000-2008.                                                                                                                                                                                                                                                                                                                |
| Signorelli C, Wakefield CE, Fardell JE, et al. The impact of long-term follow-up care for childhood cancer survivors: A systematic review. <i>Critical Reviews in Oncology-Hematology</i> . 2017;114:131-138.                                                                                                                                                                                                                                                                                                           |
| Smets AM, Deurloo EE, Slager TJE, Stoker J, Bipat S. Whole-body magnetic resonance imaging for detection of skeletal metastases in children and young people with primary solid tumors - systematic review. <i>Pediatric Radiology</i> . 2018;48(2):241-252.                                                                                                                                                                                                                                                            |
| Smithson EF, Phillips R, Harvey DW, Morrall MCHJ. The use of stimulant medication to improve neurocognitive and learning outcomes in children diagnosed with brain tumours: A systematic review. <i>European Journal of Cancer</i> . 3029;49(14):3029-3040.                                                                                                                                                                                                                                                             |
| Stout NL, Baima J, Swisher AK, Winters-Stone KM, Welsh J. A Systematic Review of Exercise Systematic Reviews in the Cancer Literature (2005-2017). <i>PM and R</i> . 2017;9(9 Supplement 2):S347-S384.                                                                                                                                                                                                                                                                                                                  |
| Teuffel O, Kuster SP, Hunger SP, et al. Dexamethasone versus prednisone for induction therapy in childhood acute lymphoblastic leukemia: A systematic review and meta-analysis. <i>Leukemia</i> . 1232;25(8):1232-1238.                                                                                                                                                                                                                                                                                                 |
| Thrane S. Effectiveness of integrative modalities for pain and anxiety in children and adolescents with cancer: a systematic review. <i>Journal of Pediatric Oncology Nursing</i> . 2013;30(6):320-332.                                                                                                                                                                                                                                                                                                                 |

|                                                                                                                                                                                                                                                                                                          |
|----------------------------------------------------------------------------------------------------------------------------------------------------------------------------------------------------------------------------------------------------------------------------------------------------------|
| Trottenberg P, Elsner F, Strasser F, Fearon K, Kaasa S, Radbruch L. Fish oil for the treatment of cancer cachexia: A systematic review for the EPCRC. Palliative Medicine.Conference:EAPC 2010. Glasgow United Kingdom. Conference Publication: (var.pagings). 2024 (2014 SUPPL. 2011) (pp S2029-S2030). |
| Tzani A, Doulamis IP, Mylonas KS, Avgerinos DV, Nasioudis D. Cardiac Tumors in Pediatric Patients: A Systematic Review. World Journal for Pediatric and Congenital Hearth Surgery. 2017;8(5):624-632.                                                                                                    |
| Usher-Smith JA, Silarova B, Sharp SJ, Mills K, Griffin SJ. Effect of interventions incorporating personalised cancer risk information on intentions and behaviour: a systematic review and meta-analysis of randomised controlled trials. BMJ Open. 2018;8(1):e017717.                                   |
| van Dalen EC, Mank A, Leclercq E, et al. Low bacterial diet versus control diet to prevent infection in cancer patients treated with chemotherapy causing episodes of neutropenia. Cochrane Database of Systematic Reviews. 2016(4).                                                                     |
| van Dalen EC, Raphaël MF, Caron HN, Kremer LCM. Treatment including anthracyclines versus treatment not including anthracyclines for childhood cancer. Cochrane Database of Systematic Reviews. 2014(9).                                                                                                 |
| Wacker K, Tanner L, Ovans J, Mason J, Gilchrist L. Improving Functional Mobility in Children and Adolescents Undergoing Treatment for Non–Central Nervous System Cancers: A Systematic Review. PM&R. 2017;9(9S2):S385-S397.                                                                              |
| Wong J, Fettes L. Effects of exercise intervention for children with acute lymphoblastic leukemia: A systematic review. Rehabilitation Oncology. 2014;32(3):40-51.                                                                                                                                       |
| Yetgin S, Olcay L, Dibar E, et al. Systematic review of the addition of vincristine plus steroid pulses in maintenance treatment for childhood acute lymphoblastic leukaemia - An individual patient data meta-analysis involving 5659 children. British Journal of Haematology. 2010;149(5):722-733.    |
| Al Nofal A, Gionfriddo MR, Javed A, et al. Accuracy of thyroid nodule sonography for the detection of thyroid cancer in children: systematic review and meta-analysis. Clinical Endocrinology. 2016;84(3):423-430.                                                                                       |
| Fu LY, Bonhomme LA, Cooper SC, Joseph JG, Zimet GD. Educational interventions to increase HPV vaccination acceptance: a systematic review. Vaccine. 2014;32(17):1901-1920.                                                                                                                               |
| Grunfeld E, Huang D, Wilson C. Systematic review of interventions to reduce sun exposure and skin cancer risk among adolescents. Psycho-Oncology.Conference:2017 World Congress of Psycho-Oncology. Germany. 2026 (Supplement 2013) (pp 2110).                                                           |
| Henrikson NB, Morrison CC, Blasi PR, Nguyen M, Shibuya KC, Patnode CD. Behavioral Counseling for Skin Cancer Prevention: Evidence Report and Systematic Review for the US Preventive Services Task Force. JAMA. 2018;319(11):1143-1157.                                                                  |
| Rabin BA, Glasgow RE, Kerner JF, Klump MP, Brownson RC. Dissemination and implementation research on community-based cancer prevention: a systematic review. American Journal of Preventive Medicine. 2010;38(4):443-456.                                                                                |
| Tripp MK, Vernon SW, Gritz ER, Diamond PM, Mullen PD. Children's skin cancer prevention: a systematic review of parents' psychosocial measures. American Journal of Preventive Medicine. 2013;44(3):265-273.                                                                                             |
| <b>Outdoor pollution</b>                                                                                                                                                                                                                                                                                 |
| An R, Shen J, Ying B, Tainio M, Andersen ZJ, de Nazelle A. Impact of ambient air pollution on physical activity and sedentary behavior in China: A systematic review. Environmental Research. 2019;176(no pagination).                                                                                   |
| Canova C, Jarvis D, Walker S, Cullinan P. Systematic review of the effects of domestic paints on asthma related symptoms in people with or without asthma. Journal of Asthma. 2013;50(10):1020-1030.                                                                                                     |
| De Bourdeaudhuij I, Van Cauwenberghe E, Spittaels H, et al. School-based interventions promoting both physical activity and healthy eating in Europe: A systematic review within the HOPE project. Obesity Reviews. 2011;12(3):205-216.                                                                  |

|                                                                                                                                                                                                                                                                                                    |
|----------------------------------------------------------------------------------------------------------------------------------------------------------------------------------------------------------------------------------------------------------------------------------------------------|
| Dherani M, Pope D, Mascarenhas M, Smith KR, Weber M, Bruce N. Indoor air pollution from unprocessed solid fuel use and pneumonia risk in children aged under five years: A systematic review and meta-analysis. <i>Bulletin of the World Health Organization</i> . 2008;86(5):390-394.             |
| Froes Asmus CI, Camara VM, Landrigan PJ, Claudio L. A Systematic Review of Children's Environmental Health in Brazil. <i>Annals of Global Health</i> . 2016;82(1):132-148.                                                                                                                         |
| Jadambaa A, Spickett J, Badrakh B, Norman RE. The impact of the environment on health in Mongolia: a systematic review. <i>Asia-Pacific Journal of Public Health</i> . 2015;27(1):45-75.                                                                                                           |
| Macdonald C, Sternberg A, Hunter P. A systematic review and meta-analysis of interventions used to reduce exposure to house dust and their effect on the development and severity of asthma. <i>Ciencia &amp; Saude Coletiva</i> . 2008;13(6):1907-1915.                                           |
| Nurmagambetov TA, Barnett SB, Jacob V, et al. Economic value of home-based, multi-trigger, multicomponent interventions with an environmental focus for reducing asthma morbidity a community guide systematic review. <i>American Journal of Preventive Medicine</i> . 2011;41(2 Suppl 1):S33-47. |
| Steenland K, Pillarisetti A, Kirby M, et al. Modeling the potential health benefits of lower household air pollution after a hypothetical liquified petroleum gas (LPG) cookstove intervention. <i>Environment International</i> . 2018;111(pp 71-79).                                             |
| Cooper NJ, Kendrick D, Achana F, et al. Network meta-analysis to evaluate the effectiveness of interventions to increase the uptake of smoke alarms. <i>Epidemiologic Reviews</i> . 2012;34(1):32-45.                                                                                              |
| Crocker DD, Kinyota S, Dumitru GG, et al. Effectiveness of home-based, multi-trigger, multicomponent interventions with an environmental focus for reducing asthma morbidity: a community guide systematic review. <i>American Journal of Preventive Medicine</i> . 2011;41(2 Suppl 1):S5-32.      |
| Daly JB, Mackenzie LJ, Freund M, Wolfenden L, Roseby R, Wiggers JH. Interventions by Health care professionals who provide routine child health care to reduce tobacco smoke exposure in children a review and meta-Analysis. <i>JAMA Pediatrics</i> . 2016;170(2):138-147.                        |
| Dick S, Doust E, Cowie H, Ayres JG, Turner S. Associations between environmental exposures and asthma control and exacerbations in young children: a systematic review. <i>BMJ Open</i> . 2014;4(2):e003827.                                                                                       |
| Haby MM, Soares A, Chapman E, Clark R, Korc M, Galvao LA. Interventions that facilitate sustainable development by preventing toxic exposure to chemicals: an overview of systematic reviews. <i>Pan American Journal of Public Health</i> . 2016;39(6):378-386.                                   |
| Yeoh B, Woolfenden S, Lanphear B, Ridley GF, Livingstone N, Jorgensen E. Household interventions for preventing domestic lead exposure in children. <i>Cochrane Database of Systematic Reviews</i> . 2014(12):CD006047.                                                                            |
| <b>Indoor pollution</b>                                                                                                                                                                                                                                                                            |
| Behbod B, Sharma M, Baxi R, Roseby R, Webster P. Family and carer smoking control programmes for reducing children's exposure to environmental tobacco smoke. [Review]. <i>Cochrane Database of Systematic Reviews</i> . 2018;1(01):31.                                                            |
| Brown N, Luckett T, Davidson PM, Di Giacomo M. Interventions to reduce harm from smoking with families in infancy and early childhood: A systematic review. <i>International Journal of Environmental Research and Public Health</i> . 2015;12(3):3091-3119.                                       |
| Brown N, Luckett T, Davidson PM, DiGiacomo M. Family-focussed interventions to reduce harm from smoking in primary school-aged children: A systematic review of evaluative studies. [Review]. <i>Preventive Medicine</i> . 2017;101:117-125.                                                       |
| Donnelly D, Everard MM, Chang AB. Indoor air modification interventions for prolonged non-specific cough in children. [Review] [12 refs]. <i>Cochrane Database of Systematic Reviews</i> . 2006;3:19.                                                                                              |

|                                                                                                                                                                                                                                                                                                                                     |
|-------------------------------------------------------------------------------------------------------------------------------------------------------------------------------------------------------------------------------------------------------------------------------------------------------------------------------------|
| Havens D, Jary HR, Patel LB, Chiume ME, Mortimer KJ. Strategies for reducing exposure to indoor air pollution from household burning of solid fuels: Effects on acute lower respiratory infections in children under the age of 15 years. <i>Cochrane Database of Systematic Reviews</i> . 2015;2015 (9) (no pagination)(CD011870). |
| Haynes E, Lanphear BP, Tohn E, Farr N, Rhoads GG. The effect of interior lead hazard controls on children's blood lead concentrations: a systematic evaluation. <i>Environmental Health Perspectives</i> . 2002;110(1):103-107.                                                                                                     |
| Kendrick D, Young B, Mason-Jones AJ, et al. Home safety education and provision of safety equipment for injury prevention. <i>Cochrane Database of Systematic Reviews</i> . 2012(9).                                                                                                                                                |
| Kilburn S, Lasserson TJ, McKean M. Pet allergen control measures for allergic asthma in children and adults. [Review] [35 refs]. <i>Cochrane Database of Systematic Reviews</i> . 2003;1.                                                                                                                                           |
| May SM, Wang Z, Pyle R, Ott NL, Charoenlap S, Joshi AY. Effective of second hand smoke exposure (SHS) on asthma morbidity and healthcare utilization: Systematic review and meta-analysis. <i>Journal of Allergy and Clinical Immunology</i> . 2015;1):AB111.                                                                       |
| Monson E, Arsenault N. Effects of enactment of legislative (public) smoking bans on voluntary home smoking restrictions: A review. <i>Nicotine and Tobacco Research</i> . 2017;19(2):141-148.                                                                                                                                       |
| Postma J, Karr C, Kieckhefer G. Community health workers and environmental interventions for children with asthma: a systematic review. [Review] [7 refs]. <i>Journal of Asthma</i> . 2009;46(6):564-576.                                                                                                                           |
| Roseby R, Waters E, Polnay A, Campbell R, Webster P, Spencer N. Family and carer smoking control programmes for reducing children's exposure to environmental tobacco smoke. [Review] [61 refs]. <i>Cochrane Database of Systematic Reviews</i> . 2003;3.                                                                           |
| Wang Z, May SM, Charoenlap S, et al. Effects of secondhand smoke exposure on asthma morbidity and health care utilization in children: a systematic review and meta-analysis. <i>Annals of Allergy, Asthma, &amp; Immunology</i> . 2015;115(5):396-401.                                                                             |
| Welker K, Nabors L, Lang M, Bernstein J. Educational and home-environment asthma interventions for children in urban, low-income, minority families. <i>Journal of Asthma</i> . 2018;55(12):1301-1314.                                                                                                                              |
| Zhou L, Niu L, Jiang H, Jiang C, Xiao S. Facilitators and Barriers of Smokers' Compliance with Smoking Bans in Public Places: A Systematic Review of Quantitative and Qualitative Literature. [Review]. <i>International Journal of Environmental Research &amp; Public Health</i> [Electronic Resource]. 2016;13(12):11.           |
| Zhou YH, Mak YW, Ho GWK. Effectiveness of Interventions to Reduce Exposure to Parental Secondhand Smoke at Home among Children in China: A Systematic Review. <i>International Journal of Environmental Research &amp; Public Health</i> [Electronic Resource]. 2019;16(1):03.                                                      |
| <b>Environmental contaminants</b>                                                                                                                                                                                                                                                                                                   |
| Aikenhead A, Knai C, Lobstein T. Effectiveness and cost-effectiveness of paediatric bariatric surgery: a systematic review. <i>Clinical Obesity</i> . 2011;1(1):12-25.                                                                                                                                                              |
| Alaluusua S. Aetiology of Molar-Incisor Hypomineralisation: A systematic review. <i>European Archives of Paediatric Dentistry: Official Journal of the European Academy of Paediatric Dentistry</i> . 2010;11(2):53-58.                                                                                                             |
| Alduraywish SA, Lodge CJ, Campbell B, et al. The march from early life food sensitization to allergic disease: a systematic review and meta-analyses of birth cohort studies. <i>Allergy</i> . 2016;71(1):77-89.                                                                                                                    |
| Allen D, Gillen E, Rixson L. Systematic review of the effectiveness of integrated care pathways: what works, for whom, in which circumstances? <i>International Journal of Evidence-Based Healthcare</i> . 2009;7(2):61-74.                                                                                                         |
| Alonso-Pedrero L, Bes-Rastrollo M, Marti A. Effects of antidepressant and antipsychotic use on weight gain: A systematic review. <i>Obesity Reviews</i> .0(0).                                                                                                                                                                      |
| Alvarado-Cruz I, Alegria-Torres JA, Montes-Castro N, Jimenez-Garza O, Quintanilla-Vega B. Environmental epigenetic changes, as risk factors for the development of diseases in children: A systematic review. <i>Annals of Global Health</i> . 2018;84(2):212-224.                                                                  |

|                                                                                                                                                                                                                                                                                                     |
|-----------------------------------------------------------------------------------------------------------------------------------------------------------------------------------------------------------------------------------------------------------------------------------------------------|
| Americano GCA, Jacobsen PE, Soviero VM, Haubek D. A systematic review on the association between molar incisor hypomineralization and dental caries. <i>International Journal of Paediatric Dentistry</i> . 2017;27(1):11-21.                                                                       |
| An R, Shen J, Ying B, Tainio M, Andersen ZJ, de Nazelle A. Impact of ambient air pollution on physical activity and sedentary behavior in China: A systematic review. <i>Environmental Research</i> . 2019;176(no pagination).                                                                      |
| An R, Zhang S, Ji M, Guan C. Impact of ambient air pollution on physical activity among adults: a systematic review and meta-analysis. <i>Perspectives in Public Health</i> . 2018;138(2):111-121.                                                                                                  |
| Anyimah-Ackah E, Ofosu IW, Lutterodt HE, Darko G. Exposures and risks of arsenic, cadmium, lead, and mercury in cocoa beans and cocoa-based foods: A systematic review. <i>Food Quality and Safety</i> . 2019;3(1):1-8.                                                                             |
| Aryan Z, Rezaei N, Camargo CA, Jr. Vitamin D status, aeroallergen sensitization, and allergic rhinitis: A systematic review and meta-analysis. <i>International Reviews of Immunology</i> . 2017;36(1):41-53.                                                                                       |
| Augustine S, Avey MT, Harrison B, et al. Mesenchymal Stromal Cell Therapy in Bronchopulmonary Dysplasia: Systematic Review and Meta-Analysis of Preclinical Studies. <i>STEM CELLS Translational Medicine</i> . 2017;6(12):2079-2093.                                                               |
| Avery A, Bostock L, McCullough F. A systematic review investigating interventions that can help reduce consumption of sugar-sweetened beverages in children leading to changes in body fatness. <i>Journal of Human Nutrition and Dietetics</i> . 2015;28(s1):52-64.                                |
| Avila ML, Shah V, Brandão LR. Systematic review on heparin-induced thrombocytopenia in children: a call to action. <i>Journal of Thrombosis and Haemostasis</i> . 2013;11(4):660-669.                                                                                                               |
| Bagot KS, Kaminer Y. Efficacy of stimulants for cognitive enhancement in non-attention deficit hyperactivity disorder youth: a systematic review. <i>Addiction</i> . 2014;109(4):547-557.                                                                                                           |
| Bailey C, Klas A, Cox R, Bergmeier H, Avery J, Skouteris H. Systematic review of organisation-wide, trauma-informed care models in out-of-home care (OoHC) settings. <i>Health &amp; Social Care in the Community</i> . 2019;27(3):e10-e22.                                                         |
| Ballas SK, Zeidan AM, Duong VH, DeVeaux M, Heeney MM. The effect of iron chelation therapy on overall survival in sickle cell disease and $\beta$ -thalassemia: A systematic review. <i>American Journal of Hematology</i> . 2018;93(7):943-952.                                                    |
| Ballesteros V, Costa O, Iniguez C, Fletcher T, Ballester F, Lopez-Espinosa MJ. Exposure to perfluoroalkyl substances and thyroid function in pregnant women and children: A systematic review of epidemiologic studies. <i>Environment International</i> . 2017;99:15-28.                           |
| Bao Y, Chen Z, Liu E, Xiang L, Zhao D, Hong J. Risk Factors in Preschool Children for Predicting Asthma During the Preschool Age and the Early School Age: a Systematic Review and Meta-Analysis. <i>Current Allergy and Asthma Reports</i> . 2017;17(12).                                          |
| Barbara G, Facchin F, Meschia M, Berlanda N, Frattaruolo MP, Vercellini P. When love hurts. A systematic review on the effects of surgical and pharmacological treatments for endometriosis on female sexual functioning. <i>Acta Obstetrica et Gynecologica Scandinavica</i> . 2017;96(6):668-687. |
| Bashashati M, Rezaei N, Bashashati H, et al. Cytokine gene polymorphisms are associated with irritable bowel syndrome: a systematic review and meta-analysis. <i>Neurogastroenterology &amp; Motility</i> . 2012;24(12):1102-e1566.                                                                 |
| Berthaume MA, Di Federico E, Bull AMJ. Fabella prevalence rate increases over 150 years, and rates of other sesamoid bones remain constant: a systematic review. <i>Journal of Anatomy</i> . 2019;235(1):67-79.                                                                                     |
| Black JA, White B, Viner RM, Simmons RK. Bariatric surgery for obese children and adolescents: a systematic review and meta-analysis. <i>Obesity Reviews</i> . 2013;14(8):634-644.                                                                                                                  |
| Blackmore AM, Gibson N, Cooper MS, Langdon K, Moshovis L, Wilson AC. Interventions for management of respiratory disease in young people with cerebral palsy: A systematic review. <i>Child: Care, Health and Development</i> . 2019;45(5):754-771.                                                 |

|                                                                                                                                                                                                                                                                                                                                                                                                                                                             |
|-------------------------------------------------------------------------------------------------------------------------------------------------------------------------------------------------------------------------------------------------------------------------------------------------------------------------------------------------------------------------------------------------------------------------------------------------------------|
| <p>Blakey JD, Woulough K, James AC, et al. A systematic review of factors associated with future asthma attacks to inform a risk assessment questionnaire. Thorax.Conference:British Thoracic Society Winter Meeting 2012. London United Kingdom. Conference Publication: (var.pagings). 2067 (SUPPL. 2012) (pp A2031-A2032).</p>                                                                                                                           |
| <p>Boothe VL, Boehmer TK, Wendel AM, Yip FY. Residential traffic exposure and childhood leukemia: a systematic review and meta-analysis. American Journal of Preventive Medicine. 2014;46(4):413-422.</p>                                                                                                                                                                                                                                                   |
| <p>Bowatte G, Lodge C, Lowe AJ, et al. The influence of early life traffic related air pollution exposure on asthma, allergy and sensitisation: A systematic review and a meta-analysis of birth cohort studies. Internal Medicine Journal.Conference:25th Annual Conference of the Australasian Society of Clinical Immunology and Allergy, ASCIA 2014. Melbourne, VIC Australia. Conference Publication: (var.pagings). 2044 (SUPPL. 2014) (pp 2013).</p> |
| <p>Boyce JO, Kilpatrick N, Morgan AT. Speech and language characteristics in individuals with nonsyndromic submucous cleft palate—A systematic review. Child: Care, Health and Development. 2018;44(6):818-831.</p>                                                                                                                                                                                                                                         |
| <p>Braden RO, Leventer RJ, Jansen A, Scheffer IE, Morgan AT. Speech and language in bilateral perisylvian polymicrogyria: a systematic review. Developmental Medicine &amp; Child Neurology. 2019;61(10):1145-1152.</p>                                                                                                                                                                                                                                     |
| <p>Brady P, Kangas M, McGill K. "Family Matters": A Systematic Review of the Evidence For Family Psychoeducation For Major Depressive Disorder. Journal of Marital and Family Therapy. 2017;43(2):245-263.</p>                                                                                                                                                                                                                                              |
| <p>Bright T, Felix L, Kuper H, Polack S. Systematic review of strategies to increase access to health services among children over five in low- and middle-income countries. Tropical Medicine &amp; International Health. 2018;23(5):476-507.</p>                                                                                                                                                                                                          |
| <p>Bunn D, Jimoh O, Howard-Wilsher S, Hooper L. Effectiveness of external factors to reduce the dehydration risk in older people living in residential care: A systematic review. Proceedings of the Nutrition Society.Conference:Nutrition Society Summer Meeting 2013. Newcastle-upon-Tyne United Kingdom. Conference Publication: (var.pagings). 2072 (OCE2014) (pp E2277).</p>                                                                          |
| <p>Cable AL, Domsch C. Systematic review of the literature on the treatment of children with late language emergence. International Journal of Language &amp; Communication Disorders. 2011;46(2):138-154.</p>                                                                                                                                                                                                                                              |
| <p>Campbell KL, Landells CE, Fan J, Brenner DR. A Systematic Review of the Effect of Lifestyle Interventions on Adipose Tissue Gene Expression: Implications for Carcinogenesis. Obesity. 2017;25(S2):S40-S51.</p>                                                                                                                                                                                                                                          |
| <p>Canova C, Jarvis D, Walker S, Cullinan P. Systematic review of the effects of domestic paints on asthma related symptoms in people with or without asthma. Journal of Asthma. 2013;50(10):1020-1030.</p>                                                                                                                                                                                                                                                 |
| <p>Cantali D. Moving to secondary school for children with ASN: a systematic review of international literature. British Journal of Special Education. 2019;46(1):29-52.</p>                                                                                                                                                                                                                                                                                |
| <p>Cantor AG, Hendrickson R, Blazina I, Griffin J, Grusing S, McDonagh MS. Screening for Elevated Blood Lead Levels in Childhood and Pregnancy: Updated Evidence Report and Systematic Review for the US Preventive Services Task Force. JAMA. 2019;321(15):1510-1526.</p>                                                                                                                                                                                  |
| <p>Carson KV, Brinn M, Chang A, Esterman A, Smith B. Mass media interventions for the prevention of smoking in young people: A systematic review. Respiriology.Conference:TSANZ and ANZSRS Annual Scientific Meetings. Perth, WA Australia. Conference Publication: (var.pagings). 16 (SUPPL. 11) (pp 24).</p>                                                                                                                                              |
| <p>Catling-Paull C, Johnston R, Ryan C, Foureur MJ, Homer CSE. Non-clinical interventions that increase the uptake and success of vaginal birth after caesarean section: a systematic review. Journal of Advanced Nursing. 2011;67(8):1662-1676.</p>                                                                                                                                                                                                        |
| <p>Cengelli S, O'Loughlin J, Lauzon B, Cornuz J. Predictors of smoking cessation in adolescent smokers: A systematic review of longitudinal studies. American Journal of Epidemiology.Conference:3rd North American Congress of Epidemiology. Montreal, QC Canada. Conference Publication: (var.pagings). 173 (SUPPL. 111) (pp S126).</p>                                                                                                                   |



|                                                                                                                                                                                                                                                                                                                                                                                                                               |
|-------------------------------------------------------------------------------------------------------------------------------------------------------------------------------------------------------------------------------------------------------------------------------------------------------------------------------------------------------------------------------------------------------------------------------|
| Cengelli S, O'Loughlin JL, Lauzon B, Cornuz J. A systematic review of longitudinal populationbased studies on the predictors of smoking cessation in adolescent and young adult smokers. <i>Journal of General Internal Medicine</i> .Conference:35th Annual Meeting of the Society of General Internal Medicine, SGIM 2012. Orlando, FL United States. Conference Publication: (var.pagings). 2027 (SUPPL. 2012) (pp S2110). |
| Cherkani-Hassani A, Ghanname I, Benitez-Rexach AM, Mouane N. Systematic Review of the Literature of Factors Affecting the Exposure and the Levels of Lead in Human Breast Milk. <i>Reviews of environmental contamination and toxicology</i> . 2019;26.                                                                                                                                                                       |
| Chinapaw MJM, Proper KI, Brug J, van Mechelen W, Singh AS. Relationship between young peoples' sedentary behaviour and biomedical health indicators: a systematic review of prospective studies. <i>Obesity Reviews</i> . 2011;12(7):e621-e632.                                                                                                                                                                               |
| Chong E, Ensom MHH. Pharmacogenetics of the Proton Pump Inhibitors: A Systematic Review. <i>Pharmacotherapy: The Journal of Human Pharmacology and Drug Therapy</i> . 2003;23(4):460-471.                                                                                                                                                                                                                                     |
| Ciapponi A, Lewin S, Herrera CA, et al. Delivery arrangements for health systems in low-income countries: an overview of systematic reviews. <i>Cochrane Database of Systematic Reviews</i> . 2017(9).                                                                                                                                                                                                                        |
| Clement KD, Lapitan MCM, Omar MI, Glazener CMA. Urodynamic studies for management of urinary incontinence in children and adults: A short version Cochrane systematic review and meta-analysis. <i>Neurourology and Urodynamics</i> . 2015;34(5):407-412.                                                                                                                                                                     |
| Conde-Agudelo A, Papageorgiou A, Kennedy S, Villar J. Novel biomarkers for the prediction of the spontaneous preterm birth phenotype: a systematic review and meta-analysis. <i>BJOG: An International Journal of Obstetrics &amp; Gynaecology</i> . 2011;118(9):1042-1054.                                                                                                                                                   |
| Copanitsanou P, Valkeapää K. Effects of education of paediatric patients undergoing elective surgical procedures on their anxiety – a systematic review. <i>Journal of Clinical Nursing</i> . 2014;23(7-8):940-954.                                                                                                                                                                                                           |
| Corrêa-Faria P, Martins CC, Bönecker M, Paiva SM, Ramos-Jorge ML, Pordeus IA. Clinical factors and socio-demographic characteristics associated with dental trauma in children: a systematic review and meta-analysis. <i>Dental Traumatology</i> . 2016;32(5):367-378.                                                                                                                                                       |
| Crompton H, Burke D, Lin Y-C. Mobile learning and student cognition: A systematic review of PK-12 research using Bloom's Taxonomy. <i>British Journal of Educational Technology</i> . 2019;50(2):684-701.                                                                                                                                                                                                                     |
| Dalrymple KV, Martyni-Orenowicz J, Flynn AC, Poston L, O'Keeffe M. Can antenatal diet and lifestyle interventions influence childhood obesity? A systematic review. <i>Maternal &amp; Child Nutrition</i> . 2018;14(4):e12628.                                                                                                                                                                                                |
| Daneshparvar M, Mostafavi SA, Jeddi MZ, et al. The role of lead exposure on Attention-Deficit/Hyperactivity Disorder in children: A systematic review. <i>Iranian Journal of Psychiatry</i> . 2016;11(1):1-14.                                                                                                                                                                                                                |
| Davis P, Henderson-Smart D. Post-extubation prophylactic nasal continuous positive airway pressure in preterm infants: Systematic review and meta-analysis. <i>Journal of Paediatrics and Child Health</i> . 1999;35(4):367-371.                                                                                                                                                                                              |
| De Buck E, Van Remoortel H, Hannes K, et al. Approaches to promote handwashing and sanitation behaviour change in low- and middle-income countries: a mixed method systematic review. <i>Campbell Systematic Reviews</i> . 2017;13(1):1-447.                                                                                                                                                                                  |
| de Graaff LF, Honig A, van Pampus MG, Stramrood CAI. Preventing post-traumatic stress disorder following childbirth and traumatic birth experiences: a systematic review. <i>Acta Obstetrica et Gynecologica Scandinavica</i> . 2018;97(6):648-656.                                                                                                                                                                           |
| Dean N, Herbison P, Ellis G, Wilson D. Systematic review: Laparoscopic colposuspension and tension-free vaginal tape: a systematic review*. <i>BJOG: An International Journal of Obstetrics &amp; Gynaecology</i> . 2006;113(12):1345-1353.                                                                                                                                                                                   |
| Dhawan A, Lawlor MW, Mazariegos GV, et al. Disease burden of Crigler–Najjar syndrome: systematic review and future perspectives. <i>Journal of Gastroenterology and Hepatology</i> .0(ja).                                                                                                                                                                                                                                    |

|                                                                                                                                                                                                                                                                                                     |
|-----------------------------------------------------------------------------------------------------------------------------------------------------------------------------------------------------------------------------------------------------------------------------------------------------|
| Dherani M, Pope D, Mascarenhas M, Smith KR, Weber M, Bruce N. Indoor air pollution from unprocessed solid fuel use and pneumonia risk in children aged under five years: a systematic review and meta-analysis. <i>Bulletin of the World Health Organization</i> . 2008;86(5):390-398C.             |
| Dick S, Friend A, Dynes K, et al. A systematic review of associations between environmental exposures and development of asthma in children aged up to 9 years. <i>BMJ Open</i> . 2014;4(11).                                                                                                       |
| Diez A, Cassanello P, Lidon C, Matilla N, Balaguer A, Martinez JM. Update the evidence about thirdhand smoke: A systematic review. <i>European Respiratory Journal</i> . Conference: European Respiratory Society International Congress, ERS 2018. France. 2052 (Supplement 2062) (no pagination). |
| Diez-Izquierdo A, Cassanello-Penarroya P, Lidon-Moyano C, Matilla-Santander N, Balaguer A, Martinez-Sanchez JM. Update on thirdhand smoke: A comprehensive systematic review. <i>Environmental Research</i> . 2018;167(pp 341-371).                                                                 |
| Dinh TQ, Calabrò A. Asian Family Firms through Corporate Governance and Institutions: A Systematic Review of the Literature and Agenda for Future Research. <i>International Journal of Management Reviews</i> . 2019;21(1):50-75.                                                                  |
| Dorman DC, Chiu W, Hales BF, et al. Polybrominated diphenyl ether (PBDE) neurotoxicity: a systematic review and meta-analysis of animal evidence. <i>Journal of Toxicology &amp; Environmental Health Part B: Critical Reviews</i> . 2018;21(4):269-289.                                            |
| Duncan KM, MacGillivray S, Renfrew MJ. Costs and savings of parenting interventions: results of a systematic review. <i>Child: Care, Health and Development</i> . 2017;43(6):797-811.                                                                                                               |
| Dunn EC, Uddin M, Subramanian SV, Smoller JW, Galea S, Koenen KC. Research Review: Gene–environment interaction research in youth depression – a systematic review with recommendations for future research. <i>Journal of Child Psychology and Psychiatry</i> . 2011;52(12):1223-1238.             |
| ECKHARDT CL, van der BOM JG, VAN DER NAALD M, PETERS M, KAMPHUISEN PW, FIJNVANDRAAT K. Surgery and inhibitor development in hemophilia A: a systematic review. <i>Journal of Thrombosis and Haemostasis</i> . 2011;9(10):1948-1958.                                                                 |
| Engel A, Lamm SH. Arsenic exposure and childhood cancer--a systematic review of the literature. <i>Journal of Environmental Health</i> . 2008;71(3):12-16.                                                                                                                                          |
| Ernst A, Todt I, Wagner J. Safety and effectiveness of the Vibrant Soundbridge in treating conductive and mixed hearing loss: A systematic review. <i>The Laryngoscope</i> . 2016;126(6):1451-1457.                                                                                                 |
| Esteban-Vasallo MD, Aragones N, Pollan M, Lopez-Abente G, Perez-Gomez B. Mercury, cadmium, and lead levels in human placenta: a systematic review. <i>Environmental Health Perspectives</i> . 2012;120(10):1369-1377.                                                                               |
| Exley D, Norman A, Hyland M. Adverse childhood experience and asthma onset: A systematic review. <i>European Respiratory Review</i> . 2015;24(136):299-305.                                                                                                                                         |
| Fakhri Y, Bjorklund G, Bandpei AM, et al. Concentrations of arsenic and lead in rice ( <i>Oryza sativa</i> L.) in Iran: A systematic review and carcinogenic risk assessment. <i>Food &amp; Chemical Toxicology</i> . 2018;113:267-277.                                                             |
| Fakhri Y, Mohseni-Bandpei A, Oliveri Conti G, et al. Systematic review and health risk assessment of arsenic and lead in the fished shrimps from the Persian gulf. <i>Food &amp; Chemical Toxicology</i> . 2018;113:278-286.                                                                        |
| Farris MS, Devoe DJ, Addington J. Attrition rates in trials for adolescents and young adults at clinical high-risk for psychosis: A systematic review and meta-analysis. <i>Early Intervention in Psychiatry</i> . 0(0).                                                                            |
| Ferluga ED, Sathe NA, Krishnaswami S, Mcpheeters ML. Surgical intervention for feeding and nutrition difficulties in cerebral palsy: a systematic review. <i>Developmental Medicine &amp; Child Neurology</i> . 2014;56(1):31-43.                                                                   |
| Ferrante M, Napoli S, Grasso A, Zuccarello P, Cristaldi A, Copat C. Systematic review of arsenic in fresh seafood from the Mediterranean Sea and European Atlantic coasts: A health risk assessment. <i>Food and Chemical Toxicology</i> . 2019;126(pp 322-331).                                    |

|                                                                                                                                                                                                                                                                                                                                       |
|---------------------------------------------------------------------------------------------------------------------------------------------------------------------------------------------------------------------------------------------------------------------------------------------------------------------------------------|
| Fiegel H, Gfroerer S, Rolle U. Systematic review shows that pathological lead points are important and frequent in intussusception and are not limited to infants. <i>Acta Paediatrica</i> . 2016;105(11):1275-1279.                                                                                                                  |
| Filges T, Sonne-Schmidt CS, Nielsen BCV. Small class sizes for improving student achievement in primary and secondary schools: a systematic review. <i>Campbell Systematic Reviews</i> . 2018;14(1):1-107.                                                                                                                            |
| Filippini T, Hatch EE, Rothman KJ, et al. Association between Outdoor Air Pollution and Childhood Leukemia: A Systematic Review and Dose-Response Meta-Analysis. <i>Environmental health perspectives</i> . 2019;127(4).                                                                                                              |
| Finning K, Ukoumunne OC, Ford T, et al. Review: The association between anxiety and poor attendance at school – a systematic review. <i>Child and Adolescent Mental Health</i> . 2019;24(3):205-216.                                                                                                                                  |
| Flanigan C, Sheikh A, DunnGalvin A, Brew BK, Almqvist C, Nwaru BI. Prenatal maternal psychosocial stress and offspring's asthma and allergic disease: A systematic review and meta-analysis. <i>Clinical &amp; Experimental Allergy</i> . 2018;48(4):403-414.                                                                         |
| Ford N, Matteelli A, Shubber Z, et al. TB as a cause of hospitalization and in-hospital mortality among people living with HIV worldwide: a systematic review and meta-analysis. <i>Journal of the International AIDS Society</i> . 2016;19(1):20714.                                                                                 |
| Frank JJ, Poulakos AG, Tornero-Velez R, Xue J. Systematic review and meta-analyses of lead (Pb) concentrations in environmental media (soil, dust, water, food, and air) reported in the United States from 1996 to 2016. <i>Science of the Total Environment</i> . 2019;694(no pagination).                                          |
| Froes Asmus CI, Camara VM, Landrigan PJ, Claudio L. A Systematic Review of Children's Environmental Health in Brazil. <i>Annals of Global Health</i> . 2016;82(1):132-148.                                                                                                                                                            |
| Gascon M, Morales E, Sunyer J, Vrijheid M. Effects of persistent organic pollutants on the developing respiratory and immune systems: a systematic review. <i>Environment International</i> . 2013;52:51-65.                                                                                                                          |
| Giang HTN, Banno K, Minh LHN, et al. Dengue hemophagocytic syndrome: A systematic review and meta-analysis on epidemiology, clinical signs, outcomes, and risk factors. <i>Reviews in Medical Virology</i> . 2018;28(6):e2005.                                                                                                        |
| Giugliani ERJ, Horta BL, Loret de Mola C, Lisboa BO, Victora CG. Effect of breastfeeding promotion interventions on child growth: a systematic review and meta-analysis. <i>Acta Paediatrica</i> . 2015;104(S467):20-29.                                                                                                              |
| Glinianaia SV, Rankin J, Bell R, Pless-Mulloli T, Howel D. Does particulate air pollution contribute to infant death? A systematic review. <i>Environmental Health Perspectives</i> . 2004;112(14):1365-1371.                                                                                                                         |
| Glinianaia SV, Rankin J, Bell R, Pless-Mulloli T, Howel D. Particulate air pollution and fetal health: a systematic review of the epidemiologic evidence. <i>Epidemiology</i> . 2004;15(1):36-45.                                                                                                                                     |
| Gomersall JS, Gibson O, Dwyer J, et al. What Indigenous Australian clients value about primary health care: a systematic review of qualitative evidence. <i>Australian and New Zealand Journal of Public Health</i> . 2017;41(4):417-423.                                                                                             |
| Goodman M, Lakind JS, Mattison DR. Do phthalates act as obesogens in humans? A systematic review of the epidemiological literature. <i>Critical Reviews in Toxicology</i> . 2014;44(2):151-175.                                                                                                                                       |
| Gorospe EC, Gerstenberger SL. Atypical sources of childhood lead poisoning in the United States: a systematic review from 1966-2006. <i>Clinical Toxicology: The Official Journal of the American Academy of Clinical Toxicology &amp; European Association of Poisons Centres &amp; Clinical Toxicologists</i> . 2008;46(8):728-737. |
| Grange A, Bekker H, Noyes J, Langley P. Adequacy of health-related quality of life measures in children under 5 years old: systematic review. <i>Journal of Advanced Nursing</i> . 2007;59(3):197-220.                                                                                                                                |
| Grant K, Goldizen FC, Sly PD, et al. Health consequences of exposure to e-waste: A systematic review. <i>The Lancet Global Health</i> . 2013;1(6):e350-e361.                                                                                                                                                                          |

|                                                                                                                                                                                                                                                                                          |
|------------------------------------------------------------------------------------------------------------------------------------------------------------------------------------------------------------------------------------------------------------------------------------------|
| Gutierrez-Torres DS, Barraza-Villarreal A, Hernandez-Cadena L, Escamilla-Nunez C, Romieu I. Prenatal exposure to endocrine disruptors and cardiometabolic risk in preschoolers: A systematic review based on cohort studies. <i>Annals of Global Health</i> . 2018;84(2):239-249.        |
| Haby MM, Soares A, Chapman E, Clark R, Korc M, Galvao LA. Interventions that facilitate sustainable development by preventing toxic exposure to chemicals: an overview of systematic reviews. <i>Pan American Journal of Public Health</i> . 2016;39(6):378-386.                         |
| Hadfield K, Amos M, Ungar M, Gosselin J, Ganong L. Do Changes to Family Structure Affect Child and Family Outcomes? A Systematic Review of the Instability Hypothesis. <i>Journal of Family Theory &amp; Review</i> . 2018;10(1):87-110.                                                 |
| Hai AH, Hammock K, Velasquez MM. The efficacy of technology-based interventions for alcohol and illicit drug use among women of childbearing age: A systematic review and meta-analysis. <i>Alcoholism: Clinical and Experimental Research</i> .0(ja).                                   |
| Hale G, Davies E, Grindlay DJC, Rogers NK, Harman KE. What's new in atopic eczema? An analysis of systematic reviews published in 2017. Part 2: epidemiology, aetiology and risk factors. <i>Clinical and Experimental Dermatology</i> .0(0).                                            |
| Hamilton ST, van Zuylen W, Shand A, et al. Prevention of congenital cytomegalovirus complications by maternal and neonatal treatments: a systematic review. <i>Reviews in Medical Virology</i> . 2014;24(6):420-433.                                                                     |
| Happell B, Davies C, Scott D. Health behaviour interventions to improve physical health in individuals diagnosed with a mental illness: A systematic review. <i>International Journal of Mental Health Nursing</i> . 2012;21(3):236-247.                                                 |
| Harris K, Band RJ, Cooper H, Macintyre VG, Mejia A, Wearden AJ. Distress in significant others of patients with chronic fatigue syndrome: A systematic review of the literature. <i>British Journal of Health Psychology</i> . 2016;21(4):881-893.                                       |
| Harris K, Kneale D, Lasserson TJ, McDonald VM, Grigg J, Thomas J. School-based self-management interventions for asthma in children and adolescents: a mixed methods systematic review. <i>Cochrane Database of Systematic Reviews</i> . 2019(1).                                        |
| Harris M, Brathwaite R, Scott J, et al. Drawing attention to a neglected injecting-related harm: a systematic review of AA amyloidosis among people who inject drugs. <i>Addiction</i> . 2018;113(10):1790-1801.                                                                         |
| Harrison M, Brodribb W, Hepworth J. A qualitative systematic review of maternal infant feeding practices in transitioning from milk feeds to family foods. <i>Maternal &amp; Child Nutrition</i> . 2017;13(2):e12360.                                                                    |
| Hart LM, Cornell C, Damiano SR, Paxton SJ. Parents and prevention: A systematic review of interventions involving parents that aim to prevent body dissatisfaction or eating disorders. <i>International Journal of Eating Disorders</i> . 2015;48(2):157-169.                           |
| Harvey J, Dennis C-L. Hygiene interventions for prevention of cytomegalovirus infection among childbearing women: systematic review. <i>Journal of Advanced Nursing</i> . 2008;63(5):440-450.                                                                                            |
| Hassan NM, Landorf KB, Shields N, Munteanu SE. Effectiveness of interventions to increase physical activity in individuals with intellectual disabilities: a systematic review of randomised controlled trials. <i>Journal of Intellectual Disability Research</i> . 2019;63(2):168-191. |
| He J, Ning H, Huang R. Low blood lead levels and attention-deficit hyperactivity disorder in children: a systematic review and meta-analysis. <i>Environmental Science &amp; Pollution Research</i> . 2019;26(18):17875-17884.                                                           |
| Hehua Z, Qing C, Shanyan G, Qijun W, Yuhong Z. The impact of prenatal exposure to air pollution on childhood wheezing and asthma: A systematic review. <i>Environmental Research</i> . 2017;159:519-530.                                                                                 |
| Holm AL, Severinsson E. Systematic review of the emotional state and self-management of widows. <i>Nursing &amp; Health Sciences</i> . 2012;14(1):109-120.                                                                                                                               |

|                                                                                                                                                                                                                                                                                                                                                                                                                                                                                                                                                                       |
|-----------------------------------------------------------------------------------------------------------------------------------------------------------------------------------------------------------------------------------------------------------------------------------------------------------------------------------------------------------------------------------------------------------------------------------------------------------------------------------------------------------------------------------------------------------------------|
| Hooper L, Bunn K, Jimoh FO, Howard Wilsher S. Effectiveness of factors to reduce the risk of dehydration in older people living in residential care: A systematic review. <i>European Geriatric Medicine</i> .Conference:10th International Congress of the European Union Geriatric Medicine Society - Geriatric Medicine Crossing Borders, EUGMS 2014. Rotterdam Netherlands. Conference Publication: (var.pagings). 2015 (SUPPL. 2011) (pp S2070).                                                                                                                 |
| Hujoel PP. Vitamin D and dental caries in controlled clinical trials: systematic review and meta-analysis. <i>Nutrition Reviews</i> . 2013;71(2):88-97.                                                                                                                                                                                                                                                                                                                                                                                                               |
| Iemmi V, Gibson L, Blanchet K, et al. Community-based Rehabilitation for People With Disabilities in Low- and Middle-income Countries: A Systematic Review. <i>Campbell Systematic Reviews</i> . 2015;11(1):1-177.                                                                                                                                                                                                                                                                                                                                                    |
| Institute TJB. Eye irrigation for patients with ocular chemical burns: a systematic review; Effectiveness of nurse-led preoperative assessment services for elective surgery: a systematic review; The effectiveness of using human patient simulation manikins in the teaching of clinical reasoning skills to undergraduate nursing students: a systematic review; The effectiveness of educational strategies in improving parental/caregiver management of fever in their child: a systematic review. <i>Journal of Advanced Nursing</i> . 2010;66(11):2391-2397. |
| Jacobs W, Goodson P, Barry AE, McLeroy KR. The Role of Gender in Adolescents' Social Networks and Alcohol, Tobacco, and Drug Use: A Systematic Review. <i>Journal of School Health</i> . 2016;86(5):322-333.                                                                                                                                                                                                                                                                                                                                                          |
| Jayaraman J, Nagendrababu V, Pulikkotil SJ, Innes NP. Critical appraisal of methodological quality of Systematic Reviews and Meta-analysis in Paediatric Dentistry journals. <i>International Journal of Paediatric Dentistry</i> . 2018;28(6):548-560.                                                                                                                                                                                                                                                                                                               |
| Jones HM, Al-Khudairy L, Melendez-Torres GJ, Oyebode O. Viewpoints of adolescents with overweight and obesity attending lifestyle obesity treatment interventions: a qualitative systematic review. <i>Obesity Reviews</i> . 2019;20(1):156-169.                                                                                                                                                                                                                                                                                                                      |
| Kampman MAM, Bilardo CM, Mulder BJM, et al. Maternal cardiac function, uteroplacental Doppler flow parameters and pregnancy outcome: a systematic review. <i>Ultrasound in Obstetrics &amp; Gynecology</i> . 2015;46(1):21-28.                                                                                                                                                                                                                                                                                                                                        |
| Kane GA, Wood VA, Barlow J. Parenting programmes: a systematic review and synthesis of qualitative research. <i>Child: Care, Health and Development</i> . 2007;33(6):784-793.                                                                                                                                                                                                                                                                                                                                                                                         |
| Kang A, Metayer C, Buffler P. Parental Tobacco smoking and risk of childhood leukemia: A systematic review and meta-analysis. <i>American Journal of Epidemiology</i> .Conference:3rd North American Congress of Epidemiology. Montreal, QC Canada. Conference Publication: (var.pagings). 173 (SUPPL. 111) (pp S255).                                                                                                                                                                                                                                                |
| Kaplan YC, Ozsarfati J, Etwel F, Nickel C, Nulman I, Koren G. Pregnancy outcomes following first-trimester exposure to topical retinoids: a systematic review and meta-analysis. <i>British Journal of Dermatology</i> . 2015;173(5):1132-1141.                                                                                                                                                                                                                                                                                                                       |
| Kaplan YC, Ozsarfati J, Nickel C, Koren G. Reproductive outcomes following hydroxychloroquine use for autoimmune diseases: a systematic review and meta-analysis. <i>British Journal of Clinical Pharmacology</i> . 2016;81(5):835-848.                                                                                                                                                                                                                                                                                                                               |
| Katz C, Bolton S-L, Katz LY, Isaak C, Tilston-Jones T, Sareen J. A SYSTEMATIC REVIEW OF SCHOOL-BASED SUICIDE PREVENTION PROGRAMS. <i>Depression and Anxiety</i> . 2013;30(10):1030-1045.                                                                                                                                                                                                                                                                                                                                                                              |
| Keir A, Pal S, Trivella M, et al. Adverse effects of red blood cell transfusions in neonates: a systematic review and meta-analysis. <i>Transfusion</i> . 2773;56(11):2773-2780.                                                                                                                                                                                                                                                                                                                                                                                      |
| Kennedy DA, Woodland C, Koren G. Lead exposure, gestational hypertension and pre-eclampsia: A systematic review of cause and effect. <i>Journal of Obstetrics and Gynaecology</i> . 2012;32(6):512-517.                                                                                                                                                                                                                                                                                                                                                               |
| Kennedy H, DeChants J, Bender K, Anyon Y. More than Data Collectors: A Systematic Review of the Environmental Outcomes of Youth Inquiry Approaches in the United States. <i>American Journal of Community Psychology</i> . 2019;63(1-2):208-226.                                                                                                                                                                                                                                                                                                                      |

|                                                                                                                                                                                                                                                                                                                                |
|--------------------------------------------------------------------------------------------------------------------------------------------------------------------------------------------------------------------------------------------------------------------------------------------------------------------------------|
| Ker K, Shakur H, Roberts I. Does tranexamic acid prevent postpartum haemorrhage? A systematic review of randomised controlled trials. <i>BJOG: An International Journal of Obstetrics &amp; Gynaecology</i> . 2016;123(11):1745-1752.                                                                                          |
| Keramati H, Ghorbani R, Fakhri Y, et al. Radon 222 in drinking water resources of Iran: A systematic review, meta-analysis and probabilistic risk assessment (Monte Carlo simulation). <i>Food &amp; Chemical Toxicology</i> . 2018;115:460-469.                                                                               |
| Keramati H, Miri A, Baghaei M, et al. Fluoride in Iranian Drinking Water Resources: a Systematic Review, Meta-analysis and Non-carcinogenic Risk Assessment. <i>Biological Trace Element Research</i> . 2019;188(2):261-273.                                                                                                   |
| Kerr S, Lawrence M, Darbyshire C, Middleton AR, Fitzsimmons L. Tobacco and alcohol-related interventions for people with mild/moderate intellectual disabilities: a systematic review of the literature. <i>Journal of Intellectual Disability Research</i> . 2013;57(5):393-408.                                              |
| Khan-Neelofur D, Gülmezoglu M, Villar J. Who should provide routine antenatal care for low-risk women, and how often? A systematic review of randomised controlled trials. <i>Paediatric and Perinatal Epidemiology</i> . 1998;12(s2):7-26.                                                                                    |
| Khreis H, Kelly C, Tate J, Parslow R, Lucas K, Nieuwenhuijsen M. Exposure to traffic-related air pollution and risk of development of childhood asthma: A systematic review and meta-analysis. <i>Environment International</i> . 2017;100:1-31.                                                                               |
| kianmehr H, Sabounchi NS, Seyedzadeh Sabounchi S, Cosler LE. Patient expectation trends on receiving antibiotic prescriptions for respiratory tract infections: A systematic review and meta-regression analysis. <i>International Journal of Clinical Practice</i> . 2019;73(7):e13360.                                       |
| Kim CR, Free C. Recent Evaluations of the Peer-Led Approach in Adolescent Sexual Health Education: A Systematic Review. <i>Perspectives on Sexual and Reproductive Health</i> . 2008;40(3):144-151.                                                                                                                            |
| Kim J, Lee I, Lim S. Overweight or obesity in children aged 0 to 6 and the risk of adult metabolic syndrome: A systematic review and meta-analysis. <i>Journal of Clinical Nursing</i> . 2017;26(23-24):3869-3880.                                                                                                             |
| King C, Hawcutt D, Kirkham J, Sinha I. The effect of ambient air pollution on the risk of hospitalisation with bronchiolitis in infants: A systematic review. <i>European Respiratory Journal</i> . Conference: European Respiratory Society International Congress, ERS 2018. France. 2052 (Supplement 2062) (no pagination). |
| Kingdon C, Baker L, Lavender T. Systematic Review of Nulliparous Women's Views of Planned Cesarean Birth: The Missing Component in the Debate about a Term Cephalic Trial. <i>Birth</i> . 2006;33(3):229-237.                                                                                                                  |
| Kluge J, Puerto S, Robalino D, et al. Interventions to improve the labour market outcomes of youth: A systematic review of training, entrepreneurship promotion, employment services and subsidized employment interventions. <i>Campbell Systematic Reviews</i> . 2017;13(1):1-288.                                           |
| Korang SK, Gluud C, Jakobsen JC. Glucocorticosteroids for sepsis in children. A protocol for a systematic review. <i>Acta Anaesthesiologica Scandinavica</i> . 2019;63(6):819-826.                                                                                                                                             |
| Koranteng S, Osornio Vargas AR, Buka I. Ambient air pollution and children's health: A systematic review of Canadian epidemiological studies. <i>Paediatrics and Child Health</i> . 2007;12(3):225-233.                                                                                                                        |
| Kornør H, Bergman H, Maayan N, Soares-Weiser K, Bjørndal A. Systematic reviews on child welfare services: identifying and disseminating the evidence. <i>Journal of Evaluation in Clinical Practice</i> . 2015;21(5):855-860.                                                                                                  |
| Koyashiki GA, Paoliello MM, Tchounwou PB. Lead levels in human milk and children's health risk: a systematic review. <i>Reviews on Environmental Health</i> . 2010;25(3):243-253.                                                                                                                                              |
| Kraaijenga VJC, Derksen TC, Stegeman I, Smit AL. The effect of side of implantation on unilateral cochlear implant performance in patients with prelingual and postlingual sensorineural hearing loss: A systematic review. <i>Clinical Otolaryngology</i> . 2018;43(2):440-449.                                               |

|                                                                                                                                                                                                                                                                                                        |
|--------------------------------------------------------------------------------------------------------------------------------------------------------------------------------------------------------------------------------------------------------------------------------------------------------|
| Kravvas G, Gholam K. Use of topical therapies for pediatric psoriasis: A systematic review. <i>Pediatric Dermatology</i> . 2018;35(3):296-302.                                                                                                                                                         |
| Kristjansson E, Francis DK, Liberato S, et al. Food Supplementation for Improving the Physical and Psychosocial Health of Socio-economically Disadvantaged Children Aged Three Months to Five Years: A Systematic Review. <i>Campbell Systematic Reviews</i> . 2015;11(1):1-226.                       |
| Lambert R, Grimshaw KEC, Ellis B, Jaitly J, Roberts G. Evidence that eating baked egg or milk influences egg or milk allergy resolution: a systematic review. <i>Clinical &amp; Experimental Allergy</i> . 2017;47(6):829-837.                                                                         |
| Latza U, Gerdes S, Baur X. Effects of nitrogen dioxide on human health: systematic review of experimental and epidemiological studies conducted between 2002 and 2006. <i>International Journal of Hygiene &amp; Environmental Health</i> . 2009;212(3):271-287.                                       |
| Lawry S, Samii C, Hall R, Leopold A, Hornby D, Mtero F. The Impact of Land Property Rights Interventions on Investment and Agricultural Productivity in Developing Countries: a Systematic Review. <i>Campbell Systematic Reviews</i> . 2014;10(1):1-104.                                              |
| Lee A, Kinney P, Chillrud S, Jack D. A Systematic Review of Innate Immunomodulatory Effects of Household Air Pollution Secondary to the Burning of Biomass Fuels. <i>Annals of Global Health</i> . 2015;81(3):368-374.                                                                                 |
| Li J, Sun S, Tang R, et al. Major air pollutants and risk of COPD exacerbations: a systematic review and meta-analysis. <i>International Journal of Copd</i> . 2016;11:3079-3091.                                                                                                                      |
| Lim H, Kwon HJ, Lim JA, et al. Short-term Effect of Fine Particulate Matter on Children's Hospital Admissions and Emergency Department Visits for Asthma: A Systematic Review and Meta-analysis. <i>Journal of Preventive Medicine &amp; Public Health / Yebang Uihakhoe Chi</i> . 2016;49(4):205-219. |
| Lim NLY, Shorey S. Effectiveness of technology-based educational interventions on the empowerment related outcomes of children and young adults with cancer: A quantitative systematic review. <i>Journal of Advanced Nursing</i> . 2019;75(10):2072-2084.                                             |
| Lindekilde N, Gladstone BP, Lübeck M, et al. The impact of bariatric surgery on quality of life: a systematic review and meta-analysis. <i>Obesity Reviews</i> . 2015;16(8):639-651.                                                                                                                   |
| Liu JC, Pereira G, Uhl SA, Bravo MA, Bell ML. A systematic review of the physical health impacts from non-occupational exposure to wildfire smoke. <i>Environmental Research</i> 136 (pp 120-132), 2015. Date of Publication: January 01.                                                              |
| Löhr J-M, Panic N, Vujasinovic M, Verbeke CS. The ageing pancreas: a systematic review of the evidence and analysis of the consequences. <i>Journal of Internal Medicine</i> . 2018;283(5):446-460.                                                                                                    |
| Lucas PJ, Roberts HM, Baird J, Kleijnen J, Law CM. The importance of size and growth in infancy: integrated findings from systematic reviews of scientific evidence and lay perspectives. <i>Child: Care, Health and Development</i> . 2007;33(5):635-640.                                             |
| Lynch ME, Campbell F. Cannabinoids for treatment of chronic non-cancer pain; a systematic review of randomized trials. <i>British Journal of Clinical Pharmacology</i> . 2011;72(5):735-744.                                                                                                           |
| Mac Giolla Phdraig C, Nunn J, McCallion P, McCarron M. Prevalence of edentulism among adults with intellectual disabilities: A narrative review informed by systematic review principles. <i>Special Care in Dentistry</i> . 2018;38(4):191-200.                                                       |
| MacArthur GJ, Harrison S, Caldwell DM, Hickman M, Campbell R. Peer-led interventions to prevent tobacco, alcohol and/or drug use among young people aged 11–21 years: a systematic review and meta-analysis. <i>Addiction</i> . 2016;111(3):391-407.                                                   |
| MacPhail C, McKay K. Social determinants in the sexual health of adolescent Aboriginal Australians: a systematic review. <i>Health &amp; Social Care in the Community</i> . 2018;26(2):131-146.                                                                                                        |
| Marrone L, Liberati M, Khalil A, et al. Outcome of fetal gastro-intestinal cysts: a systematic review and meta-analysis. <i>Prenatal Diagnosis</i> . 2016;36(10):966-972.                                                                                                                              |

|                                                                                                                                                                                                                                                                                                                      |
|----------------------------------------------------------------------------------------------------------------------------------------------------------------------------------------------------------------------------------------------------------------------------------------------------------------------|
| McConachie H, Diggle T. Parent implemented early intervention for young children with autism spectrum disorder: a systematic review. <i>Journal of Evaluation in Clinical Practice</i> . 2007;13(1):120-129.                                                                                                         |
| McDermott S, Salzberg DC, Anderson AP, Shaw T, Lead J. Systematic Review of Chromium and Nickel Exposure During Pregnancy and Impact on Child Outcomes. <i>Journal of Toxicology &amp; Environmental Health Part A</i> . 2015;78(21-22):1348-1368.                                                                   |
| Melendez-Torres GJ, Leijten P, Gardner F. What are the Optimal Combinations of Parenting Intervention Components to Reduce Physical Child Abuse Recurrence? Reanalysis of a Systematic Review using Qualitative Comparative Analysis. <i>Child Abuse Review</i> . 2019;28(3):181-197.                                |
| Menting MD, Mintjens S, van de Beek C, et al. Maternal obesity in pregnancy impacts offspring cardiometabolic health: Systematic review and meta-analysis of animal studies. <i>Obesity Reviews</i> . 2019;20(5):675-685.                                                                                            |
| Micheletti M, McCracken C, Constantino JN, Mandell D, Jones W, Klin A. Research Review: Outcomes of 24- to 36-month-old children with autism spectrum disorder vary by ascertainment strategy: a systematic review and meta-analysis. <i>Journal of Child Psychology and Psychiatry</i> . 0(0).                      |
| Mills NT, Scott JG, Wray NR, Cohen-Woods S, Baune BT. Research Review: The role of cytokines in depression in adolescents: a systematic review. <i>Journal of Child Psychology and Psychiatry</i> . 2013;54(8):816-835.                                                                                              |
| Minnie KS, Van Der Walt SC, Klopper HC. A systematic review of counselling for HIV testing of pregnant women. <i>Journal of Clinical Nursing</i> . 2009;18(13):1827-1841.                                                                                                                                            |
| Mir ghassemi A, Neira V, Ufholz L-A, et al. A systematic review and meta-analysis of acute severe complications of pediatric anesthesia. <i>Pediatric Anesthesia</i> . 2015;25(11):1093-1102.                                                                                                                        |
| Misra M, Golden NH, Katzman DK. State of the art systematic review of bone disease in anorexia nervosa. <i>International Journal of Eating Disorders</i> . 2016;49(3):276-292.                                                                                                                                       |
| Momo MSM, Cabus SJ, De Witte K, Groot W. A systematic review of the literature on the causes of early school leaving in Africa and Asia. <i>Review of Education</i> . 2019;7(3):496-522.                                                                                                                             |
| Moore DA, Russell AE, Matthews J, et al. School-based interventions for attention-deficit/hyperactivity disorder: A systematic review with multiple synthesis methods. <i>Review of Education</i> . 2018;6(3):209-263.                                                                                               |
| Mori R, Yonemoto N, Fitzgerald A, Tullus K, Verrier-Jones K, Lakhanpaul M. Diagnostic performance of urine dipstick testing in children with suspected UTI: a systematic review of relationship with age and comparison with microscopy. <i>Acta Paediatrica</i> . 2010;99(4):581-584.                               |
| Morris L, Lomax C. Review: Assessment, development, and treatment of childhood perfectionism: a systematic review. <i>Child and Adolescent Mental Health</i> . 2014;19(4):225-234.                                                                                                                                   |
| Navas-Acien A, Sharrett AR, Silbergeld EK, et al. Arsenic exposure and cardiovascular disease: A systematic review of the epidemiologic evidence. <i>American Journal of Epidemiology</i> . 1037;162(11):1037-1049.                                                                                                  |
| Ngoc LTN, Park D, Lee Y, Lee YC. Systematic Review and Meta-Analysis of Human Skin Diseases Due to Particulate Matter. <i>International Journal of Environmental Research &amp; Public Health</i> [Electronic Resource]. 2017;14(12):25.                                                                             |
| Ngueta G, Ndjaboue R. Blood lead concentrations in sub-Saharan African children below 6 years: systematic review. <i>Tropical Medicine &amp; International Health</i> . 2013;18(10):1283-1291.                                                                                                                       |
| Nicoloso GF, Pötter IG, Rocha RdO, Montagner F, Casagrande L. A comparative evaluation of endodontic treatments for immature necrotic permanent teeth based on clinical and radiographic outcomes: a systematic review and meta-analysis. <i>International Journal of Paediatric Dentistry</i> . 2017;27(3):217-227. |
| Nind M, Wearmouth J. Including children with special educational needs in mainstream classrooms: implications for pedagogy from a systematic review. <i>Journal of Research in Special Educational Needs</i> . 2006;6(3):116-124.                                                                                    |



|                                                                                                                                                                                                                                                                                                                                    |
|------------------------------------------------------------------------------------------------------------------------------------------------------------------------------------------------------------------------------------------------------------------------------------------------------------------------------------|
| Nippita T, Khambalia A, Seeho S, et al. Methods of classification for women undergoing induction of labour: a systematic review and novel classification system. <i>BJOG: An International Journal of Obstetrics &amp; Gynaecology</i> . 2015;122(10):1284-1293.                                                                   |
| Noel M, McMurtry CM, Pavlova M, Taddio A. Brief Clinical Report: A Systematic Review and Meta-analysis of Pain Memory-reframing Interventions for Children's Needle Procedures. <i>Pain Practice</i> . 2018;18(1):123-129.                                                                                                         |
| Norenhag J, Du J, Olovsson M, Verstraelen H, Engstrand L, Brusselaers N. The vaginal microbiota, human papillomavirus and cervical dysplasia: a systematic review and network meta-analysis. <i>BJOG: An International Journal of Obstetrics &amp; Gynaecology</i> .0(0).                                                          |
| Nye E, Melendez-Torres GJ, Gardner F. Mixed methods systematic review on effectiveness and experiences of the Incredible Years Teacher Classroom Management programme. <i>Review of Education</i> . 2019;7(3):631-669.                                                                                                             |
| O'Donovan C, O'Donovan J. Why do women request an elective cesarean delivery for non-medical reasons? A systematic review of the qualitative literature. <i>Birth</i> . 2018;45(2):109-119.                                                                                                                                        |
| Oliveira BF, Ignotti E, Hacon SS. A systematic review of the physical and chemical characteristics of pollutants from biomass burning and combustion of fossil fuels and health effects in Brazil. <i>Cadernos de Saude Publica</i> . 2011;27(9):1678-1698.                                                                        |
| Orellano P, Quaranta N, Reynoso J, Balbi B, Vasquez J. Effect of outdoor air pollution on asthma exacerbations in children and adults: Systematic review and multilevel meta-analysis. <i>PLoS ONE [Electronic Resource]</i> . 2017;12(3):e0174050.                                                                                |
| Orton S, Jones LL, Cooper S, Lewis S, Coleman T. Predictors of children's secondhand smoke exposure at home: a systematic review and narrative synthesis of the evidence. <i>PLoS ONE [Electronic Resource]</i> . 2014;9(11):e112690.                                                                                              |
| Ossiander EM. The usefulness of personal risk questionnaires for identifying lead-poisoned children. <i>American Journal of Epidemiology</i> .Conference:43rd Annual Meeting of the Society for Epidemiologic Research, SER 2010. Anaheim, CA United States. Conference Publication: (var.pagings). 2171 (SUPPL. 2011) (pp S2012). |
| Ottawa C, Sposato LA, Nabbouh F, Saposnik G, Canada SOR. Stroke preparedness in children: translating knowledge into behavioral intent: a systematic review and meta-analysis. <i>International Journal of Stroke</i> . 2015;10(7):1008-1013.                                                                                      |
| Paterson MA, King BR, Smart CEM, Smith T, Rafferty J, Lopez PE. Impact of dietary protein on postprandial glycaemic control and insulin requirements in Type 1 diabetes: a systematic review. <i>Diabetic Medicine</i> .0(0).                                                                                                      |
| Paulus FW, Ohmann S, von Gontard A, Popow C. Internet gaming disorder in children and adolescents: a systematic review. <i>Developmental Medicine &amp; Child Neurology</i> . 2018;60(7):645-659.                                                                                                                                  |
| Pérez-Cruzado D, Merchán-Baeza JA, González-Sánchez M, Cuesta-Vargas AI. Systematic review of mirror therapy compared with conventional rehabilitation in upper extremity function in stroke survivors. <i>Australian Occupational Therapy Journal</i> . 2017;64(2):91-112.                                                        |
| Petrosino A, Turpin-Petrosino C, Hollis-Peel ME, Lavenberg JG. Scared Straight and Other Juvenile Awareness Programs for Preventing Juvenile Delinquency: A Systematic Review. <i>Campbell Systematic Reviews</i> . 2013;9(1):1-55.                                                                                                |
| Pfadenhauer LM, Burns J, Rohwer A, Rehfues EA. A protocol for a systematic review of the effectiveness of interventions to reduce exposure to lead through consumer products and drinking water. <i>Systematic Reviews</i> 3 (1) (no pagination), 2014.Article Number:36. Date of Publication: April 15.                           |
| Pilkington P, Rominov H, Brown HK, Dennis C-L. Systematic review of the impact of coparenting interventions on paternal coparenting behaviour. <i>Journal of Advanced Nursing</i> . 2019;75(1):17-29.                                                                                                                              |
| Pini S, Hugh-Jones S, Gardner PH. What effect does a cancer diagnosis have on the educational engagement and school life of teenagers? A systematic review. <i>Psycho-Oncology</i> . 2012;21(7):685-694.                                                                                                                           |

|                                                                                                                                                                                                                                                                                                                                         |
|-----------------------------------------------------------------------------------------------------------------------------------------------------------------------------------------------------------------------------------------------------------------------------------------------------------------------------------------|
| Polychronakis I, Dounias G, Makropoulos V, Riza E, Linos A. Work-related leukemia: A systematic review. <i>Journal of Occupational Medicine and Toxicology</i> . 2013;8(1).                                                                                                                                                             |
| Poonai N, Paskar D, Konrad S-L, et al. Opioid Analgesia for Acute Abdominal Pain in Children: A Systematic Review and Meta-analysis. <i>Academic Emergency Medicine</i> . 2014;21(11):1183-1192.                                                                                                                                        |
| Punukollu M, Mushet N, Linney M, Hennessy C, Morton M. Neuropsychiatric manifestations of Sydenham's chorea: a systematic review. <i>Developmental Medicine &amp; Child Neurology</i> . 2016;58(1):16-28.                                                                                                                               |
| Quach P, El Sherif R, Gomes J, Krewski D. A systematic review of the risk factors associated with the onset and progression of primary brain tumours. <i>NeuroToxicology</i> . 2017;61(pp 214-232).                                                                                                                                     |
| Rahhal R, Abu-El-Haija MA, Fei L, et al. Systematic Review and Meta-Analysis of the Utilization of Ethanol Locks in Pediatric Patients With Intestinal Failure. <i>Journal of Parenteral and Enteral Nutrition</i> . 2018;42(4):690-701.                                                                                                |
| Rahman A, Granberg C, Persson LA. Early life arsenic exposure, infant and child growth, and morbidity: a systematic review. <i>Archives of Toxicology</i> . 2017;91(11):3459-3467.                                                                                                                                                      |
| Rahmani J, Fakhri Y, Shahsavani A, et al. A systematic review and meta-analysis of metal concentrations in canned tuna fish in Iran and human health risk assessment. <i>Food and Chemical Toxicology</i> . 2018;118(pp 753-765).                                                                                                       |
| Ramakreshnan L, Aghamohammadi N, Fong CS, et al. Haze and health impacts in ASEAN countries: a systematic review. <i>Environmental Science &amp; Pollution Research</i> . 2018;25(3):2096-2111.                                                                                                                                         |
| Rappazzo KM, Coffman E, Hines EP. Exposure to Perfluorinated Alkyl Substances and Health Outcomes in Children: A Systematic Review of the Epidemiologic Literature. <i>International Journal of Environmental Research &amp; Public Health</i> [Electronic Resource]. 2017;14(7):27.                                                    |
| Rashaan ZM, Krijnen P, Klamer RRM, Schipper IB, Dekkers OM, Breederveld RS. Nonsilver treatment vs. silver sulfadiazine in treatment of partial-thickness burn wounds in children: A systematic review and meta-analysis. <i>Wound Repair and Regeneration</i> . 2014;22(4):473-482.                                                    |
| Reading R. Hygiene interventions for prevention of cytomegalovirus infection among childbearing women: systematic review. <i>Child: Care, Health and Development</i> . 2009;35(1):142-143.                                                                                                                                              |
| Ribas-Fito N, Sala M, Kogevinas M, Sunyer J. Polychlorinated biphenyls (PCBs) and neurological development in children: a systematic review. <i>Journal of Epidemiology &amp; Community Health</i> . 2001;55(8):537-546.                                                                                                                |
| Ridd MJ, King AJL, Le Roux E, Waldecker A, Huntley AL. Systematic review of self-management interventions for people with eczema. <i>British Journal of Dermatology</i> . 2017;177(3):719-734.                                                                                                                                          |
| Robertson-Malt S, El Barbary M. Prophylactic steroids for paediatric open-heart surgery: a systematic review. <i>International Journal of Evidence-Based Healthcare</i> . 2008;6(4):391-395.                                                                                                                                            |
| Rodriguez-Barranco M, Lacasana M, Aguilar-Garduno C, et al. Association of arsenic, cadmium and manganese exposure with neurodevelopment and behavioural disorders in children: a systematic review and meta-analysis. <i>Science of the Total Environment</i> . 2013;454-455:562-577.                                                  |
| Rodriguez-Villamizar LA, Berney C, Villa-Roel C, Ospina MB, Osornio-Vargas A, Rowe BH. The role of socioeconomic position as an effect-modifier of the association between outdoor air pollution and children's asthma exacerbations: an equity-focused systematic review. <i>Reviews on Environmental Health</i> . 2016;31(3):297-309. |
| Rodriguez-Villamizar LA, Magico A, Osornio-Vargas A, Rowe BH. The effects of outdoor air pollution on the respiratory health of Canadian children: A systematic review of epidemiological studies. <i>Canadian Respiratory Journal</i> . 2015;22(5):282-292.                                                                            |
| Rogozińska E, Kara-Newton L, Zamora J, Khan K. On-site test to detect syphilis in pregnancy: a systematic review of test accuracy studies. <i>BJOG: An International Journal of Obstetrics &amp; Gynaecology</i> . 2017;124(5):734-741.                                                                                                 |

|                                                                                                                                                                                                                                                                                       |
|---------------------------------------------------------------------------------------------------------------------------------------------------------------------------------------------------------------------------------------------------------------------------------------|
| Rohner E, Wyss N, Heg Z, et al. HIV and human herpesvirus 8 co-infection across the globe: Systematic review and meta-analysis. <i>International Journal of Cancer</i> . 2016;138(1):45-54.                                                                                           |
| Rosen LJ, Myers V, Winickoff JP, Kott J. Effectiveness of Interventions to Reduce Tobacco Smoke Pollution in Homes: A Systematic Review and Meta-Analysis. <i>International Journal of Environmental Research &amp; Public Health</i> [Electronic Resource]. 2015;12(12):16043-16059. |
| Rossignol DA, Genuis SJ, Frye RE. Environmental toxicants and autism spectrum disorders: A systematic review. <i>Translational Psychiatry</i> . 2014;4(2).                                                                                                                            |
| Rothbaum Perito E, Lau A, Rhee S, Roberts JP, Rosenthal P. Posttransplant metabolic syndrome in children and adolescents after liver transplantation: A systematic review. <i>Liver Transplantation</i> . 2012;18(9):1009-1028.                                                       |
| Rudrapatna S, Bhatt M, Wang K-W, et al. Obesity and muscle-macrophage crosstalk in humans and mice: A systematic review. <i>Obesity Reviews</i> .0(0).                                                                                                                                |
| Rusoja E, Haynie D, Sievers J, et al. Thinking about complexity in health: A systematic review of the key systems thinking and complexity ideas in health. <i>Journal of Evaluation in Clinical Practice</i> . 2018;24(3):600-606.                                                    |
| Ryan S, Ward M, Vaughan D, et al. Do safety briefings improve patient safety in the acute hospital setting? A systematic review. <i>Journal of Advanced Nursing</i> . 2019;75(10):2085-2098.                                                                                          |
| Sanchez TR, Perzanowski M, Graziano JH. Inorganic arsenic and respiratory health, from early life exposure to sex-specific effects: A systematic review. <i>Environmental Research</i> . 2016;147:537-555.                                                                            |
| Santana GS, Giugliani ERJ, Vieira TDO, Vieira GO. Factors associated with breastfeeding maintenance for 12 months or more: a systematic review. <i>Jornal de Pediatria</i> . 2018;94(2):104-122.                                                                                      |
| Sarvet AL, Wall MM, Fink DS, et al. Medical marijuana laws and adolescent marijuana use in the United States: a systematic review and meta-analysis. <i>Addiction</i> . 2018;113(6):1003-1016.                                                                                        |
| Scassellati C, Bonvicini C, Faraone SV, Gennarelli M. Biomarkers and attention-deficit/hyperactivity disorder: A systematic review and meta-analyses. <i>Journal of the American Academy of Child and Adolescent Psychiatry</i> . 1003;51(10):1003-1019.                              |
| Scholz B, Gordon S, Happell B. Consumers in mental health service leadership: A systematic review. <i>International Journal of Mental Health Nursing</i> . 2017;26(1):20-31.                                                                                                          |
| Schuers M, Chapron A, Guihard H, Bouchez T, Darmon D. Impact of non-drug therapies on asthma control: A systematic review of the literature. <i>European Journal of General Practice</i> . 2019;25(2):65-76.                                                                          |
| Schule SA, Bolte G. Interactive and independent associations between the socioeconomic and objective built environment on the neighbourhood level and individual health: A systematic review of multilevel studies. <i>PLoS ONE</i> . 2015;10(4).                                     |
| Seijmonsbergen-Schermer AE, Sahami S, Lucas C, Jonge Ad. Nonsuturing or Skin Adhesives versus Suturing of the Perineal Skin After Childbirth: A Systematic Review. <i>Birth</i> . 2015;42(2):100-115.                                                                                 |
| Sharpe RA, Bearman N, Thornton CR, Husk K, Osborne NJ. Indoor fungal diversity and asthma: a meta-analysis and systematic review of risk factors. <i>Journal of Allergy &amp; Clinical Immunology</i> . 2015;135(1):110-122.                                                          |
| Shepherd E, Salam RA, Middleton P, et al. Neonatal interventions for preventing cerebral palsy: an overview of Cochrane Systematic Reviews. <i>Cochrane Database of Systematic Reviews</i> . 2018(6).                                                                                 |
| Shepherd E, Salam RA, Middleton P, et al. Antenatal and intrapartum interventions for preventing cerebral palsy: an overview of Cochrane systematic reviews. <i>Cochrane Database of Systematic Reviews</i> . 2017(8).                                                                |
| Sherman EJ, Primack BA. What Works to Prevent Adolescent Smoking? A Systematic Review of the National Cancer Institute's Research-Tested Intervention Programs. <i>Journal of School Health</i> . 2009;79(9):391-399.                                                                 |

|                                                                                                                                                                                                                                                                                                                                                                                                                                           |
|-------------------------------------------------------------------------------------------------------------------------------------------------------------------------------------------------------------------------------------------------------------------------------------------------------------------------------------------------------------------------------------------------------------------------------------------|
| Simonato M, Iyengar S, Brooks-Kayal A, et al. Identification and characterization of outcome measures reported in animal models of epilepsy: Protocol for a systematic review of the literature—A TASK2 report of the AES/ILAE Translational Task Force of the ILAE. <i>Epilepsia</i> . 2017;58(S4):68-77.                                                                                                                                |
| Singer S, Gianinazzi ME, Hohn A, Kuehni CE, Michel G. General practitioner involvement in follow-up of childhood cancer survivors: A systematic review. <i>Pediatric Blood &amp; Cancer</i> . 2013;60(10):1565-1573.                                                                                                                                                                                                                      |
| Smith B, Carson K, Sayemhiri K, Sayemhiri F, Brinn M. Community interventions for preventing smoking in young people: A Cochrane systematic review. <i>European Respiratory Journal</i> . Conference: European Respiratory Society Annual Congress 2014. Munich Germany. Conference Publication: (var.pagings). 2044 (SUPPL. 2058) (no pagination).                                                                                       |
| Smith-Spangler C, Brandeau ML, Hunter GE, et al. Are organic foods safer or healthier than conventional alternatives?: A systematic review. <i>Annals of Internal Medicine</i> . 2012;157(5):348-366.                                                                                                                                                                                                                                     |
| Snast I, Kaftory R, Sherman S, et al. Acquired erythropoietic protoporphyria: A systematic review of the literature. <i>Photodermatology, Photoimmunology &amp; Photomedicine</i> . 0(0).                                                                                                                                                                                                                                                 |
| Sohn W, Ismail AI, Tellez M. Efficacy of Educational Interventions Targeting Primary Care Providers' Practice Behaviors: an Overview of Published Systematic Reviews. <i>Journal of Public Health Dentistry</i> . 2004;64(3):164-172.                                                                                                                                                                                                     |
| Song Q, Li J. A systematic review of the human body burden of e-waste exposure in China. <i>Environment International</i> . 2014;68:82-93.                                                                                                                                                                                                                                                                                                |
| Spaducci G, Stubbs B, McNeill A, Stewart D, Robson D. Violence in mental health settings: A systematic review. <i>International Journal of Mental Health Nursing</i> . 2018;27(1):33-45.                                                                                                                                                                                                                                                  |
| Speckens AEM, Hawton K. Social Problem Solving in Adolescents with Suicidal Behavior: A Systematic Review. <i>Suicide and Life-Threatening Behavior</i> . 2005;35(4):365-387.                                                                                                                                                                                                                                                             |
| Spier E, Britto P, Pigott T, et al. Parental, Community, and Familial Support Interventions to Improve Children's Literacy in Developing Countries: A Systematic Review. <i>Campbell Systematic Reviews</i> . 2016;12(1):1-98.                                                                                                                                                                                                            |
| Sprinzl GM, Wolf-Magele A. The Bonebridge Bone Conduction Hearing Implant: indication criteria, surgery and a systematic review of the literature. <i>Clinical Otolaryngology</i> . 2016;41(2):131-143.                                                                                                                                                                                                                                   |
| Srour N, Thébaud B. Mesenchymal Stromal Cells in Animal Bleomycin Pulmonary Fibrosis Models: A Systematic Review. <i>STEM CELLS Translational Medicine</i> . 2015;4(12):1500-1510.                                                                                                                                                                                                                                                        |
| Sun G, Hazlewood G, Bernatsky S, Kaplan G, Eksteen B, Barnabe C. Air pollution and the rheumatic diseases: A systematic review and meta-analysis. <i>Arthritis and Rheumatology</i> . Conference: American College of Rheumatology/Association of Rheumatology Health Professionals Annual Scientific Meeting, ACR/ARHP 2015. San Francisco, CA United States. Conference Publication: (var.pagings). 2067 (SUPPL. 2010) (no pagination). |
| Sun G, Hazlewood G, Bernatsky S, Kaplan GG, Eksteen B, Barnabe C. Association between Air Pollution and the Development of Rheumatic Disease: A Systematic Review. <i>International Journal of Rheumatology</i> . 2016(pagination).                                                                                                                                                                                                       |
| Sun X, Lemyre B, Barrowman N, O'Connor M. Pain management during eye examinations for retinopathy of prematurity in preterm infants: a systematic review. <i>Acta Paediatrica</i> . 2010;99(3):329-334.                                                                                                                                                                                                                                   |
| Sutcliffe K, Caird J, Kavanagh J, et al. Comparing midwife-led and doctor-led maternity care: a systematic review of reviews. <i>Journal of Advanced Nursing</i> . 2012;68(11):2376-2386.                                                                                                                                                                                                                                                 |
| Sweeney A, Clement S, Gribble K, et al. A systematic review of qualitative studies of adults' experiences of being assessed for psychological therapies. <i>Health Expectations</i> . 2019;22(2):133-148.                                                                                                                                                                                                                                 |
| Tavernier N, Fumery M, Peyrin-Biroulet L, Colombel J-F, Gower-Rousseau C. Systematic review: fertility in non-surgically treated inflammatory bowel disease. <i>Alimentary Pharmacology &amp; Therapeutics</i> . 2013;38(8):847-853.                                                                                                                                                                                                      |

|                                                                                                                                                                                                                                                                                                                                                                                                  |
|--------------------------------------------------------------------------------------------------------------------------------------------------------------------------------------------------------------------------------------------------------------------------------------------------------------------------------------------------------------------------------------------------|
| Teeguarden JG, Hanson-Drury S. A systematic review of Bisphenol A "low dose" studies in the context of human exposure: a case for establishing standards for reporting "low-dose" effects of chemicals. <i>Food &amp; Chemical Toxicology</i> . 2013;62:935-948.                                                                                                                                 |
| Terrell ML, Hartnett KP, Marcus M. Can environmental or occupational hazards alter the sex ratio at birth? A systematic review. <i>Emerging Health Threats Journal</i> . 2011;4(1).                                                                                                                                                                                                              |
| Thomas JP, Raine T, Reddy S, Belteki G. Probiotics for the prevention of necrotising enterocolitis in very low-birth-weight infants: a meta-analysis and systematic review. <i>Acta Paediatrica</i> . 2017;106(11):1729-1741.                                                                                                                                                                    |
| Tindall L, Mikocka-Walus A, McMillan D, Wright B, Hewitt C, Gascoyne S. Is behavioural activation effective in the treatment of depression in young people? A systematic review and meta-analysis. <i>Psychology and Psychotherapy: Theory, Research and Practice</i> . 2017;90(4):770-796.                                                                                                      |
| Tolan P, Henry D, Schoeny M, Bass A, Lovegrove P, Nichols E. Mentoring Interventions to Affect Juvenile Delinquency and Associated Problems: A Systematic Review. <i>Campbell Systematic Reviews</i> . 2013;9(1):1-158.                                                                                                                                                                          |
| Ton G, Desiere S, Vellema W, Weituschat S, D'Haese M. The effectiveness of contract farming for raising income of smallholder farmers in low- and middle-income countries: a systematic review. <i>Campbell Systematic Reviews</i> . 2017;13(1):1-131.                                                                                                                                           |
| TONG S. Lead exposure and cognitive development: Persistence and a dynamic pattern. <i>Journal of Paediatrics and Child Health</i> . 1998;34(2):114-118.                                                                                                                                                                                                                                         |
| Torkzaban M, Haddad A, Baxter JK, Berghella V, Gahl WA, Al-Kouatly HB. Maternal ornithine transcarbamylase deficiency, a genetic condition associated with high maternal and neonatal mortality every clinician should know: A systematic review. <i>American Journal of Medical Genetics Part A</i> . 2019;179(10):2091-2100.                                                                   |
| Tosh R, Arnott W, Scarinci N. Parent-implemented home therapy programmes for speech and language: a systematic review. <i>International Journal of Language &amp; Communication Disorders</i> . 2017;52(3):253-269.                                                                                                                                                                              |
| Tridente A, De Luca D. Efficacy of light-emitting diode versus other light sources for treatment of neonatal hyperbilirubinemia: a systematic review and meta-analysis. <i>Acta Paediatrica</i> . 2012;101(5):458-465.                                                                                                                                                                           |
| Tsou P-Y, Chen KP, Wang Y-H, et al. Diagnostic Accuracy of Lung Ultrasound Performed by Novice Versus Advanced Sonographers for Pneumonia in Children: A Systematic Review and Meta-analysis. <i>Academic Emergency Medicine</i> . 2019;26(9):1074-1088.                                                                                                                                         |
| Tsuji JS, Garry MR, Perez V, Chang ET. Low-level arsenic exposure and developmental neurotoxicity in children: A systematic review and risk assessment. <i>Toxicology</i> . 2015;337:91-107.                                                                                                                                                                                                     |
| Turner MC, Wigle DT, Krewski D. Residential pesticides and childhood leukemia: a systematic review and meta-analysis. <i>Environmental Health Perspectives</i> . 2010;118(1):33-41.                                                                                                                                                                                                              |
| Tzani A, Economopoulos KP. Maternal tobacco use during pregnancy and risk of congenital heart defects in offspring: A systematic review. <i>Tobacco Induced Diseases</i> . Conference:11th Annual Conference of the International Society for the Prevention of Tobacco Induced Diseases, ISPTID 2013. Athens Greece. Conference Publication: (var.pagings). 2012 (SUPPL. 2011) (no pagination). |
| van der Pligt P, Willcox J, Hesketh KD, et al. Systematic review of lifestyle interventions to limit postpartum weight retention: implications for future opportunities to prevent maternal overweight and obesity following childbirth. <i>Obesity Reviews</i> . 2013;14(10):792-805.                                                                                                           |
| van Hoff SL, O'Neill ES, Cohen LC, Collins BA. Does a prophylactic dose of propofol reduce emergence agitation in children receiving anesthesia? A systematic review and meta-analysis. <i>Pediatric Anesthesia</i> . 2015;25(7):668-676.                                                                                                                                                        |
| Van Maele-Fabry G, Hoet P, Lison D. Parental occupational exposure to pesticides as risk factor for brain tumors in children and young adults: a systematic review and meta-analysis. <i>Environment International</i> . 2013;56:19-31.                                                                                                                                                          |
| Vasconcellos AP, Colello S, Kyle ME, Shin JJ. Societal-level Risk Factors Associated with Pediatric Hearing Loss: A Systematic Review. <i>Otolaryngology - Head &amp; Neck Surgery</i> . 2014;151(1):29-41.                                                                                                                                                                                      |

|                                                                                                                                                                                                                                                                                                                                                           |
|-----------------------------------------------------------------------------------------------------------------------------------------------------------------------------------------------------------------------------------------------------------------------------------------------------------------------------------------------------------|
| Vilcins D, Sly PD, Jagals P. Environmental risk factors associated with child stunting: A systematic review of the literature. <i>Annals of Global Health</i> . 2018;84(4):551-562.                                                                                                                                                                       |
| Visser J, McLachlan MH, Maayan N, Garner P. Community-based supplementary feeding for food insecure, vulnerable and malnourished populations – an overview of systematic reviews. <i>Cochrane Database of Systematic Reviews</i> . 2018(11).                                                                                                              |
| Von Werne Baes C, de Carvalho Tofoli SM, Martins CMS, Juruena MF. Assessment of the hypothalamic–pituitary–adrenal axis activity: glucocorticoid receptor and mineralocorticoid receptor function in depression with early life stress – a systematic review. <i>Acta Neuropsychiatrica</i> . 2012;24(1):4-15.                                            |
| Vrazo AC, Firth J, Amzel A, Sedillo R, Ryan J, Phelps BR. Interventions to significantly improve service uptake and retention of HIV-positive pregnant women and HIV-exposed infants along the prevention of mother-to-child transmission continuum of care: systematic review. <i>Tropical Medicine &amp; International Health</i> . 2018;23(2):136-148. |
| Vreeman RC, Gramelspacher AM, Gisore PO, Scanlon ML, Nyandiko WM. Disclosure of HIV status to children in resource-limited settings: a systematic review. <i>Journal of the International AIDS Society</i> . 2013;16(1):18466.                                                                                                                            |
| Wacker K, Tanner L, Ovans J, Mason J, Gilchrist L. Improving Functional Mobility in Children and Adolescents Undergoing Treatment for Non–Central Nervous System Cancers: A Systematic Review. <i>PM&amp;R</i> . 2017;9(9S2):S385-S397.                                                                                                                   |
| Waddington H, Snilstveit B, Hombrados J, et al. Farmer Field Schools for Improving Farming Practices and Farmer Outcomes: A Systematic Review. <i>Campbell Systematic Reviews</i> . 2014;10(1):i-335.                                                                                                                                                     |
| Wade TJ, Pai N, Eisenberg JN, Colford JM, Jr. Do U.S. Environmental Protection Agency water quality guidelines for recreational waters prevent gastrointestinal illness? A systematic review and meta-analysis. <i>Environmental Health Perspectives</i> . 2003;111(8):1102-1109.                                                                         |
| Walker L, Downe S, Gomez L. Skin Care in the Well Term Newborn: Two Systematic Reviews. <i>Birth</i> . 2005;32(3):224-228.                                                                                                                                                                                                                                |
| Wang M, Hossain F, Sulaiman R, Ren X. Exposure to Inorganic Arsenic and Lead and Autism Spectrum Disorder in Children: A Systematic Review and Meta-Analysis. <i>Chemical Research in Toxicology</i> . 2019.                                                                                                                                              |
| Warner EL, Kent EE, Trevino KM, Parsons HM, Zebrack BJ, Kirchhoff AC. Social well-being among adolescents and young adults with cancer: A systematic review. <i>Cancer</i> . 2016;122(7):1029-1037.                                                                                                                                                       |
| Warris LT, van den Heuvel-Eibrink MM, den Hoed MAH, Aarsen FK, Pieters R, van den Akker ELT. Does dexamethasone induce more neuropsychological side effects than prednisone in pediatric acute lymphoblastic leukemia? A systematic review. <i>Pediatric Blood &amp; Cancer</i> . 2014;61(7):1313-1318.                                                   |
| Weber JJ. A systematic review of nurse-led interventions with populations experiencing homelessness. <i>Public Health Nursing</i> . 2019;36(1):96-106.                                                                                                                                                                                                    |
| Weinmayr G, Romeo E, De Sario M, Weiland SK, Forastiere F. Short-term effects of PM10 and NO2 on respiratory health among children with asthma or asthma-like symptoms: a systematic review and meta-analysis. <i>Environmental Health Perspectives</i> . 2010;118(4):449-457.                                                                            |
| Welch VA, Ghogomu E, Hossain A, et al. Deworming and adjuvant interventions for improving the developmental health and well-being of children in low- and middle-income countries: a systematic review and network meta-analysis. <i>Campbell Systematic Reviews</i> . 2016;12(1):1-383.                                                                  |
| Welsh EJ, Evans DJ, Fowler SJ, Spencer S. Interventions for bronchiectasis: an overview of Cochrane systematic reviews. <i>Cochrane Database of Systematic Reviews</i> . 2015(7).                                                                                                                                                                         |
| Whear R, Thompson-Coon J, Boddy K, Ford T, Racey D, Stein K. The effect of teacher-led interventions on social and emotional behaviour in primary school children: a systematic review. <i>British Educational Research Journal</i> . 2013;39(2):383-420.                                                                                                 |

|                                                                                                                                                                                                                                                                                                                                                                                                               |
|---------------------------------------------------------------------------------------------------------------------------------------------------------------------------------------------------------------------------------------------------------------------------------------------------------------------------------------------------------------------------------------------------------------|
| White BM, Bonilha HS, Ellis C, Jr. Racial/Ethnic Differences in Childhood Blood Lead Levels Among Children <72 Months of Age in the United States: a Systematic Review of the Literature. <i>Journal of Racial &amp; Ethnic Health Disparities</i> . 2016;3(1):145-153.                                                                                                                                       |
| Williams J, Scarborough P, Matthews A, et al. A systematic review of the influence of the retail food environment around schools on obesity-related outcomes. <i>Obesity Reviews</i> . 2014;15(5):359-374.                                                                                                                                                                                                    |
| Williams JHG, Ross L. Consequences of prenatal toxin exposure for mental health in children and adolescents: A systematic review. <i>European Child and Adolescent Psychiatry</i> . 2007;16(4):243-253.                                                                                                                                                                                                       |
| Wilson DB, Brennan I, Olaghere A. Police-initiated diversion for youth to prevent future delinquent behavior: a systematic review. <i>Campbell Systematic Reviews</i> . 2018;14(1):1-88.                                                                                                                                                                                                                      |
| Wilson DB, Gill C, Olaghere A, McClure D. Juvenile Curfew Effects on Criminal Behavior and Victimization: A Systematic Review. <i>Campbell Systematic Reviews</i> . 2016;12(1):1-97.                                                                                                                                                                                                                          |
| Worrall-Davies A, Marino-Francis F. Eliciting Children's and Young People's Views of Child and Adolescent Mental Health Services: A Systematic Review of Best Practice. <i>Child and Adolescent Mental Health</i> . 2008;13(1):9-15.                                                                                                                                                                          |
| Wright TS, Cervetti GN. A Systematic Review of the Research on Vocabulary Instruction That Impacts Text Comprehension. <i>Reading Research Quarterly</i> . 2017;52(2):203-226.                                                                                                                                                                                                                                |
| Yarborough RP, Belanger K, Holford TR, Leaderer BP. Exposure to traffic and asthma in school-age children and adolescents: A systematic review. <i>American Journal of Respiratory and Critical Care Medicine</i> . Conference: American Thoracic Society International Conference, ATS 2011. Denver, CO United States. Conference Publication: (var.pagings). 2183 (2011 Meeting Abstracts) (no pagination). |
| Zajac L, Sprecher E, Landrigan PJ, Trasande L. A systematic review of US state environmental legislation and regulation with regards to the prevention of neurodevelopmental disabilities and asthma. <i>Environmental Health: A Global Access Science Source</i> . 2009;8(1).                                                                                                                                |
| Zhang S, Li G, Tian L, Guo Q, Pan X. Short-term exposure to air pollution and morbidity of COPD and asthma in East Asian area: A systematic review and meta-analysis. <i>Environmental Research</i> . 2016;148:15-23.                                                                                                                                                                                         |
| Zhao B, Vo HQ, Johnston FH, Negishi K. Air pollution and telomere length: A systematic review of 12,058 subjects. <i>Cardiovascular Diagnosis and Therapy</i> . 2018;8(4):480-492.                                                                                                                                                                                                                            |
| Zheng LY, Sanders AP, Saland JM, Wright RO, Arora M. Environmental exposures and pediatric kidney function and disease: A systematic review. <i>Environmental Research</i> . 2017;158:625-648.                                                                                                                                                                                                                |
| Zheng XY, Ding H, Jiang LN, et al. Association between Air Pollutants and Asthma Emergency Room Visits and Hospital Admissions in Time Series Studies: A Systematic Review and Meta-Analysis. <i>PLoS ONE [Electronic Resource]</i> . 2015;10(9):e0138146.                                                                                                                                                    |
| Zhu B, Wang Y, Ming J, Chen W, Zhang L. Disease burden of COPD in China: a systematic review. <i>International Journal of Copd</i> . 2018;13:1353-1364.                                                                                                                                                                                                                                                       |

## Appendix F: PRISMA flow diagrams

### Asthma

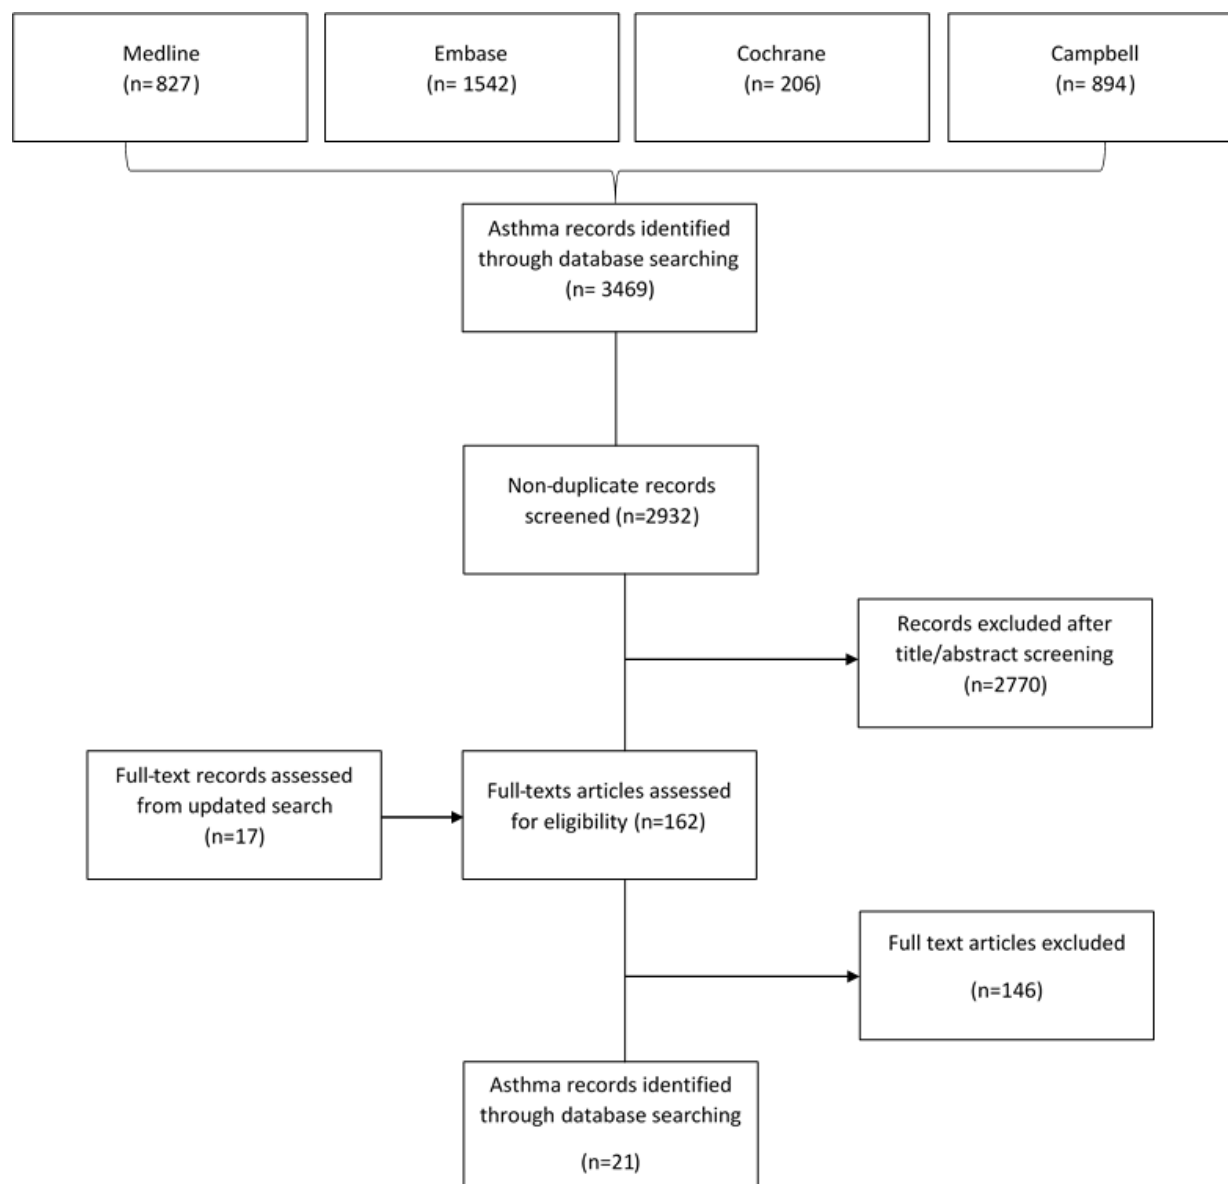



## Type 1 Diabetes

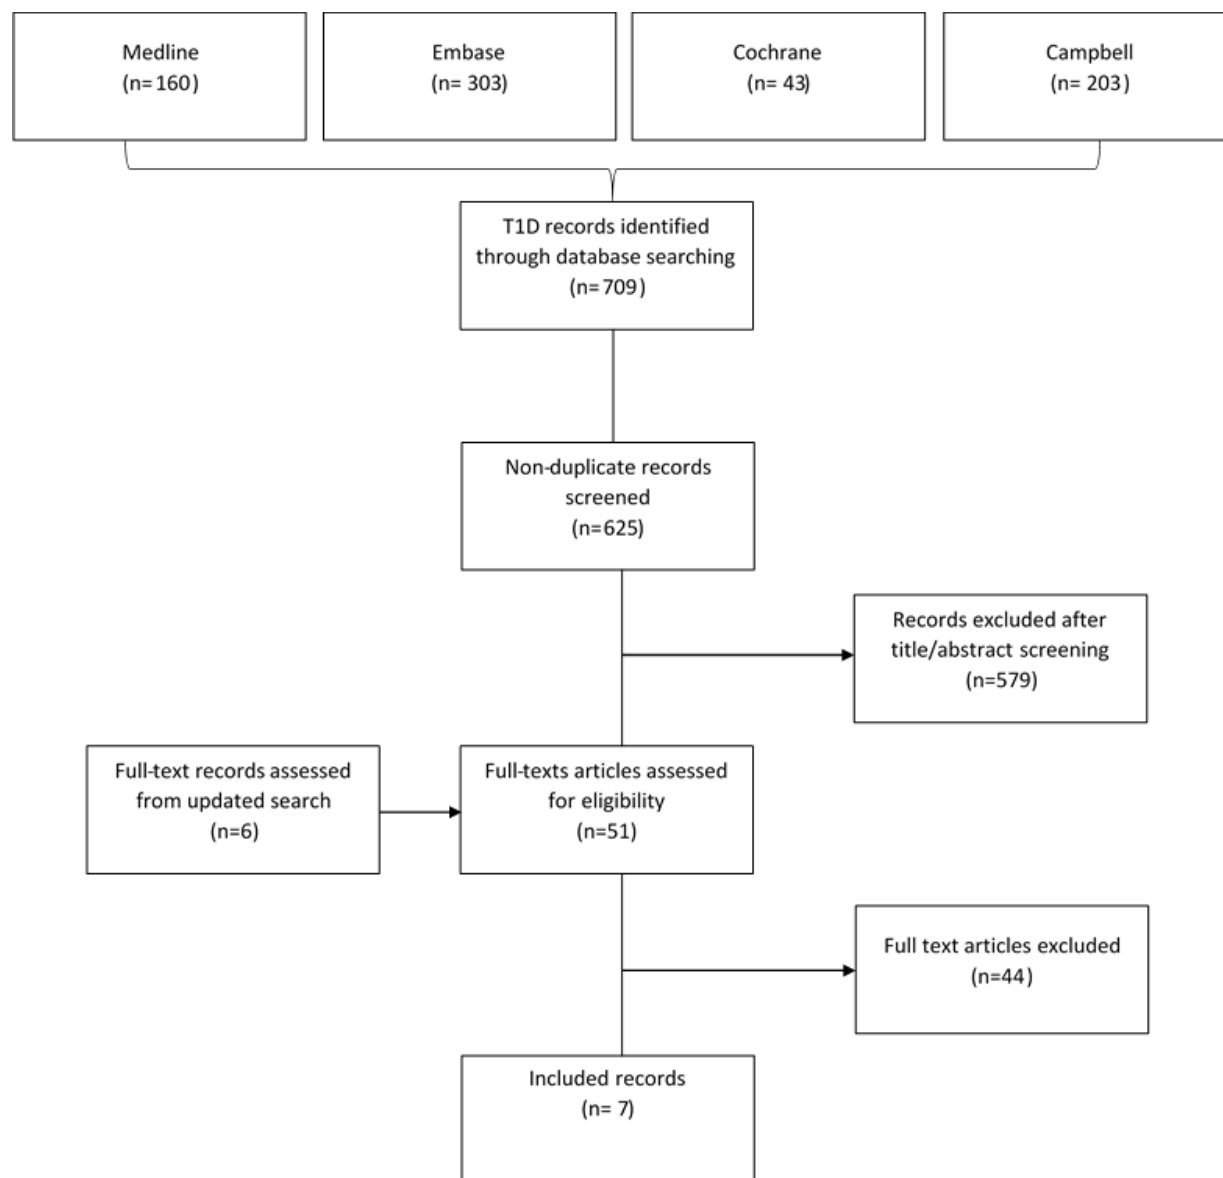

## Sickle Cell Disease

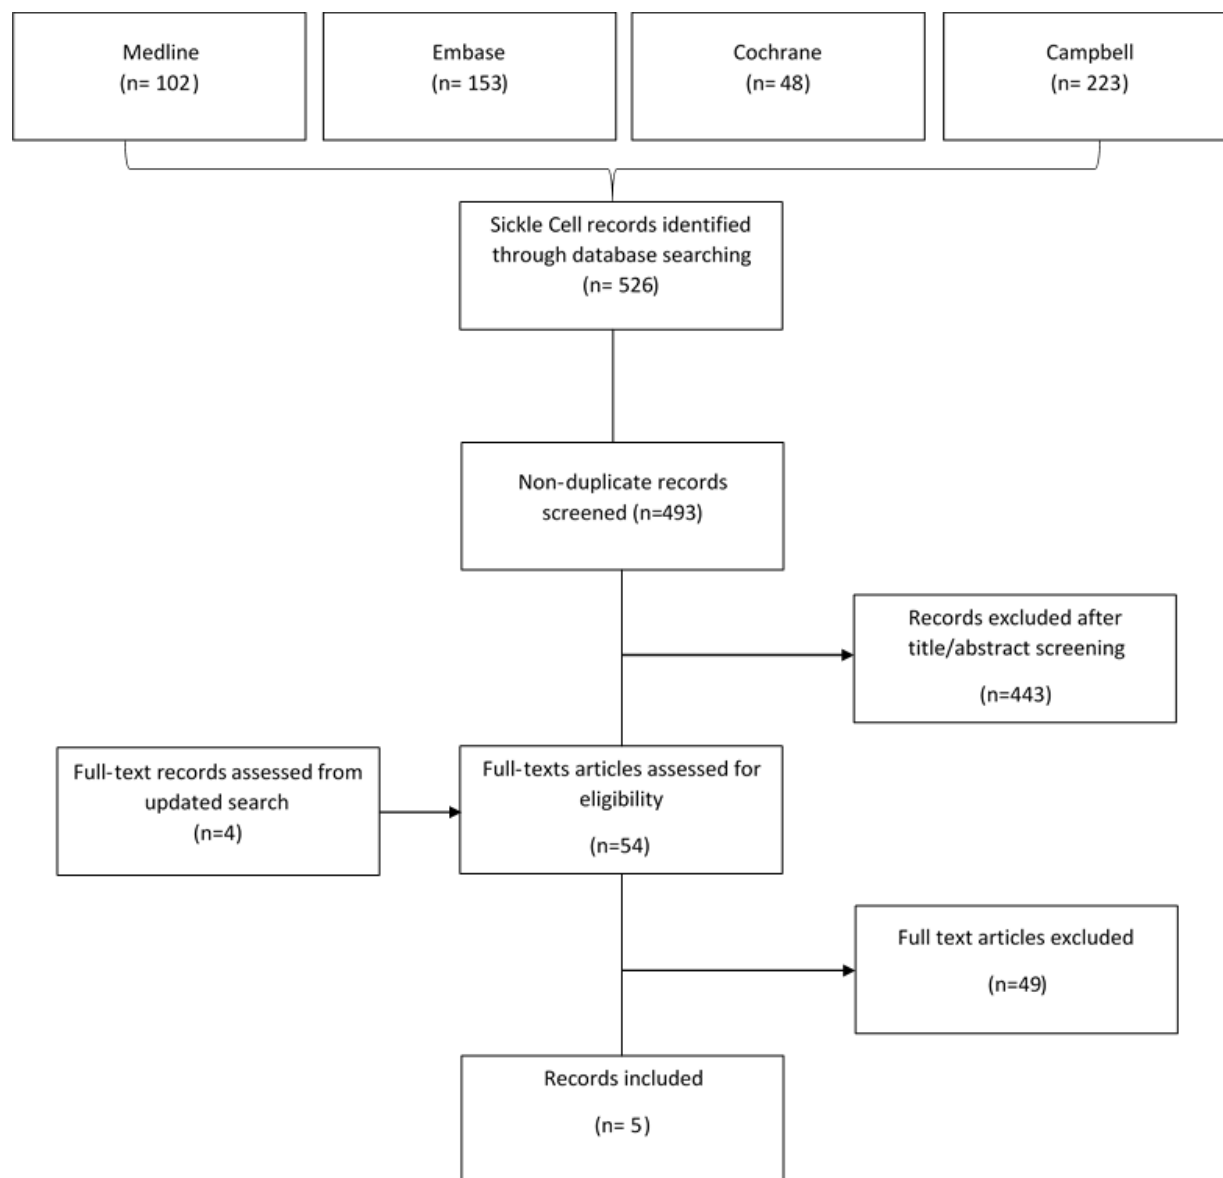

## Rheumatic Fever/rheumatic heart disease

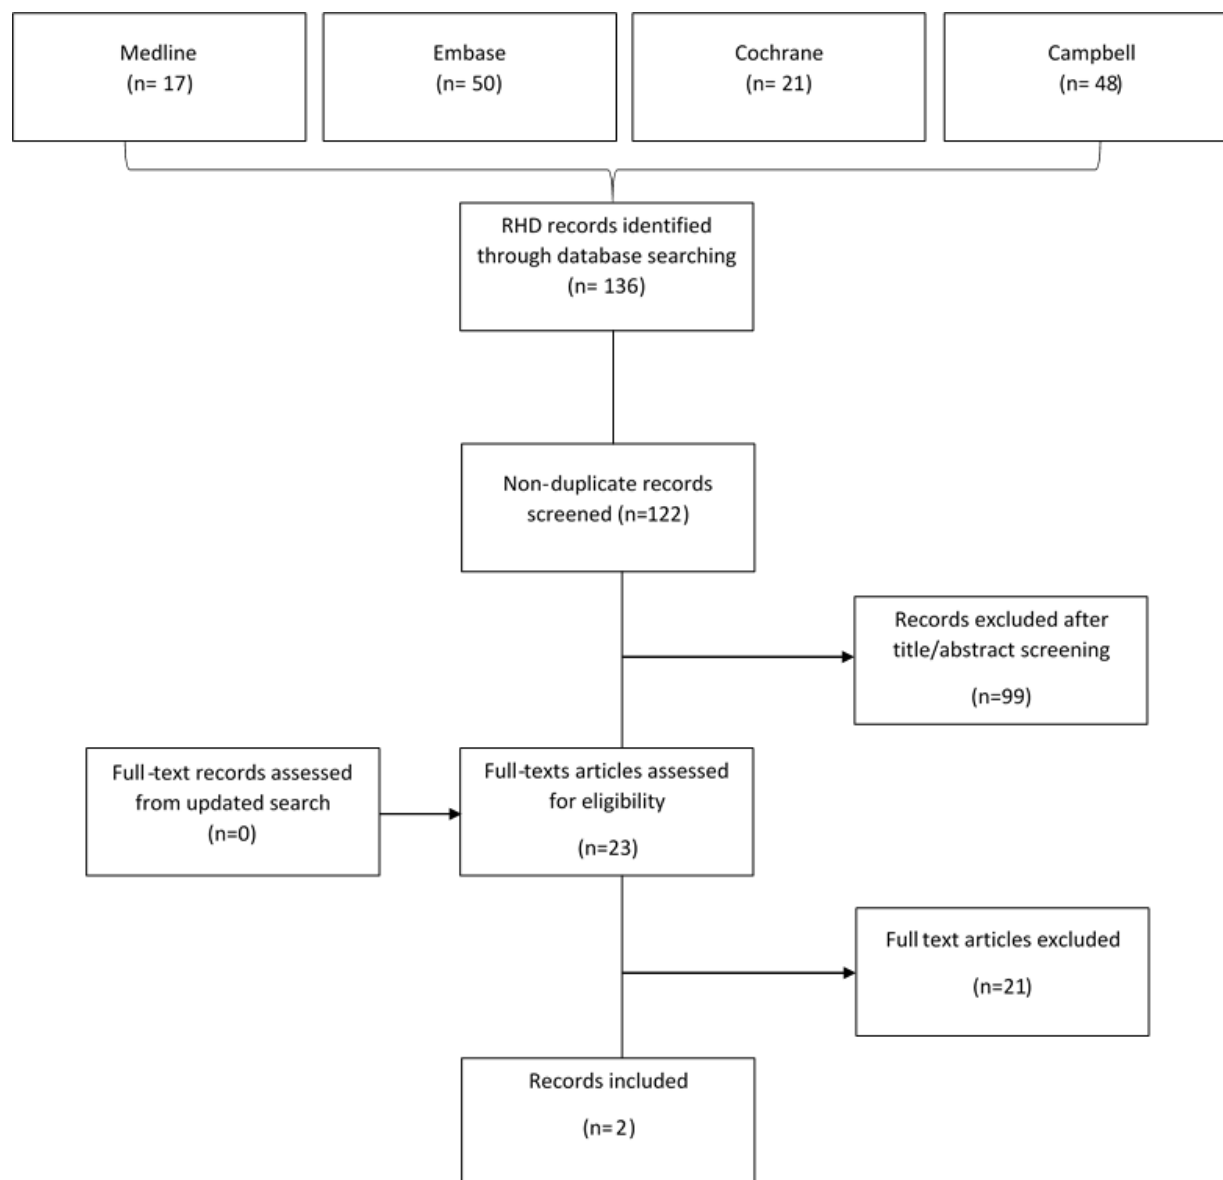

## Epilepsy

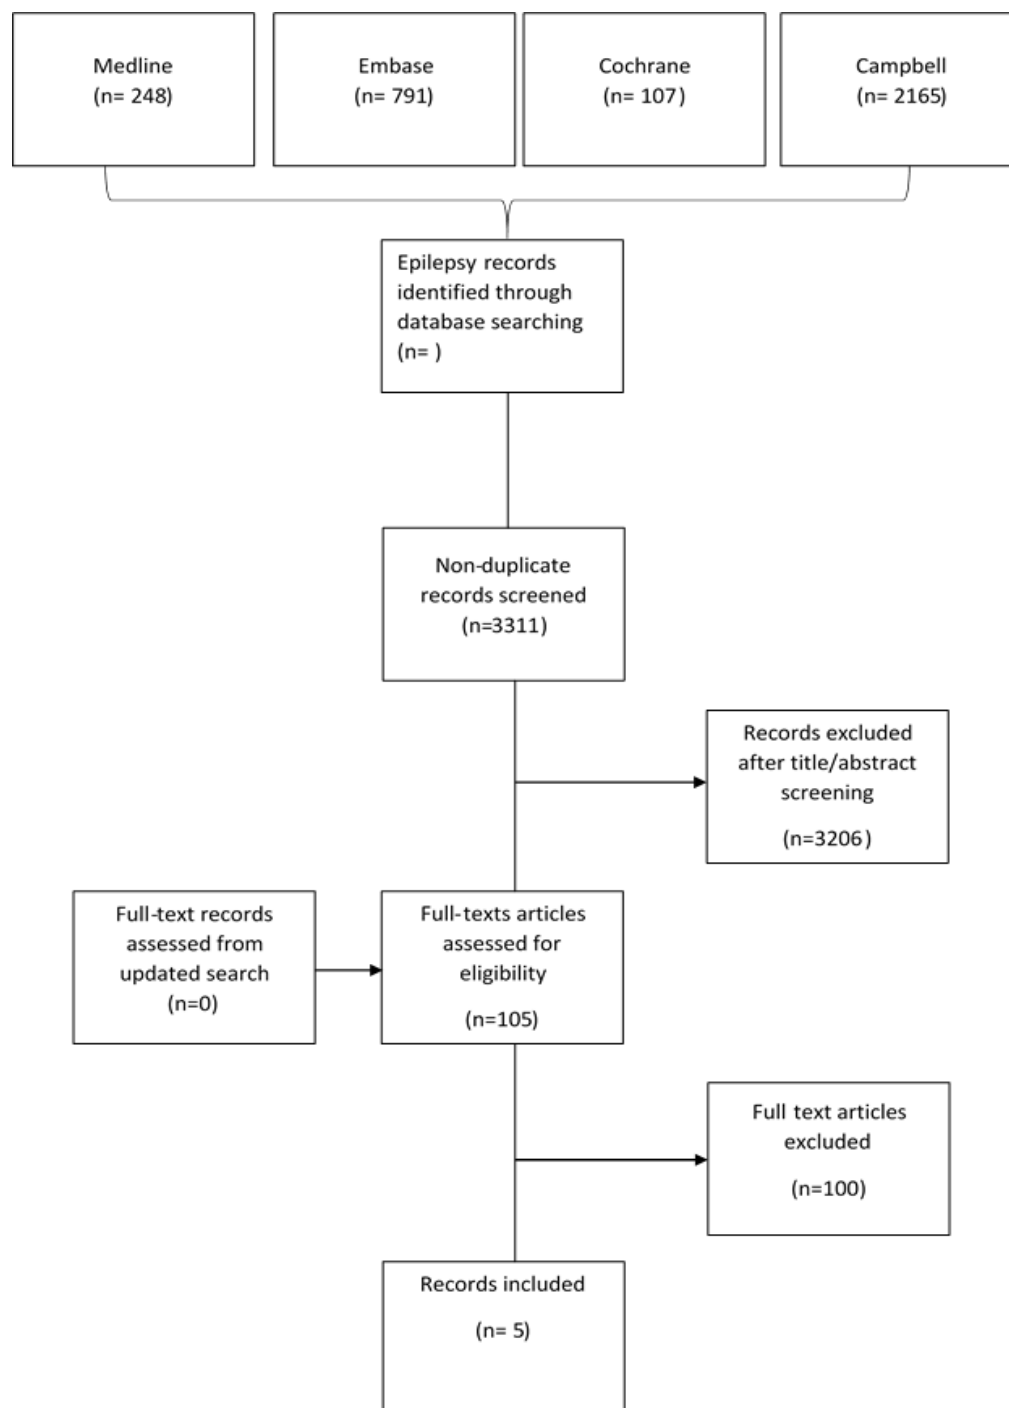

## Cancer

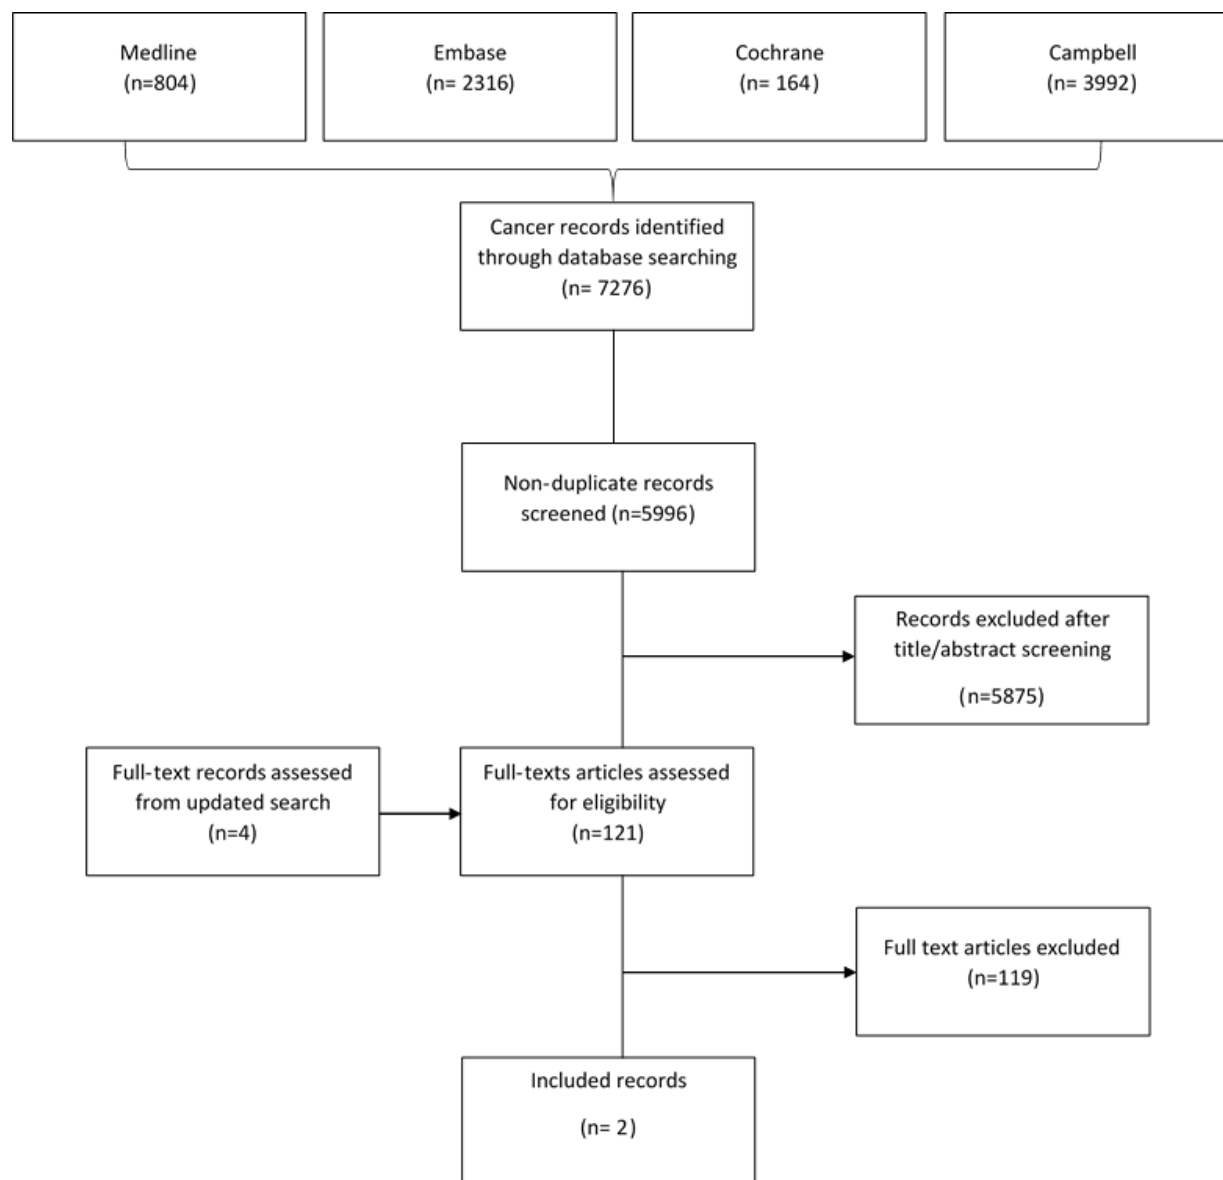

## Outdoor air pollution

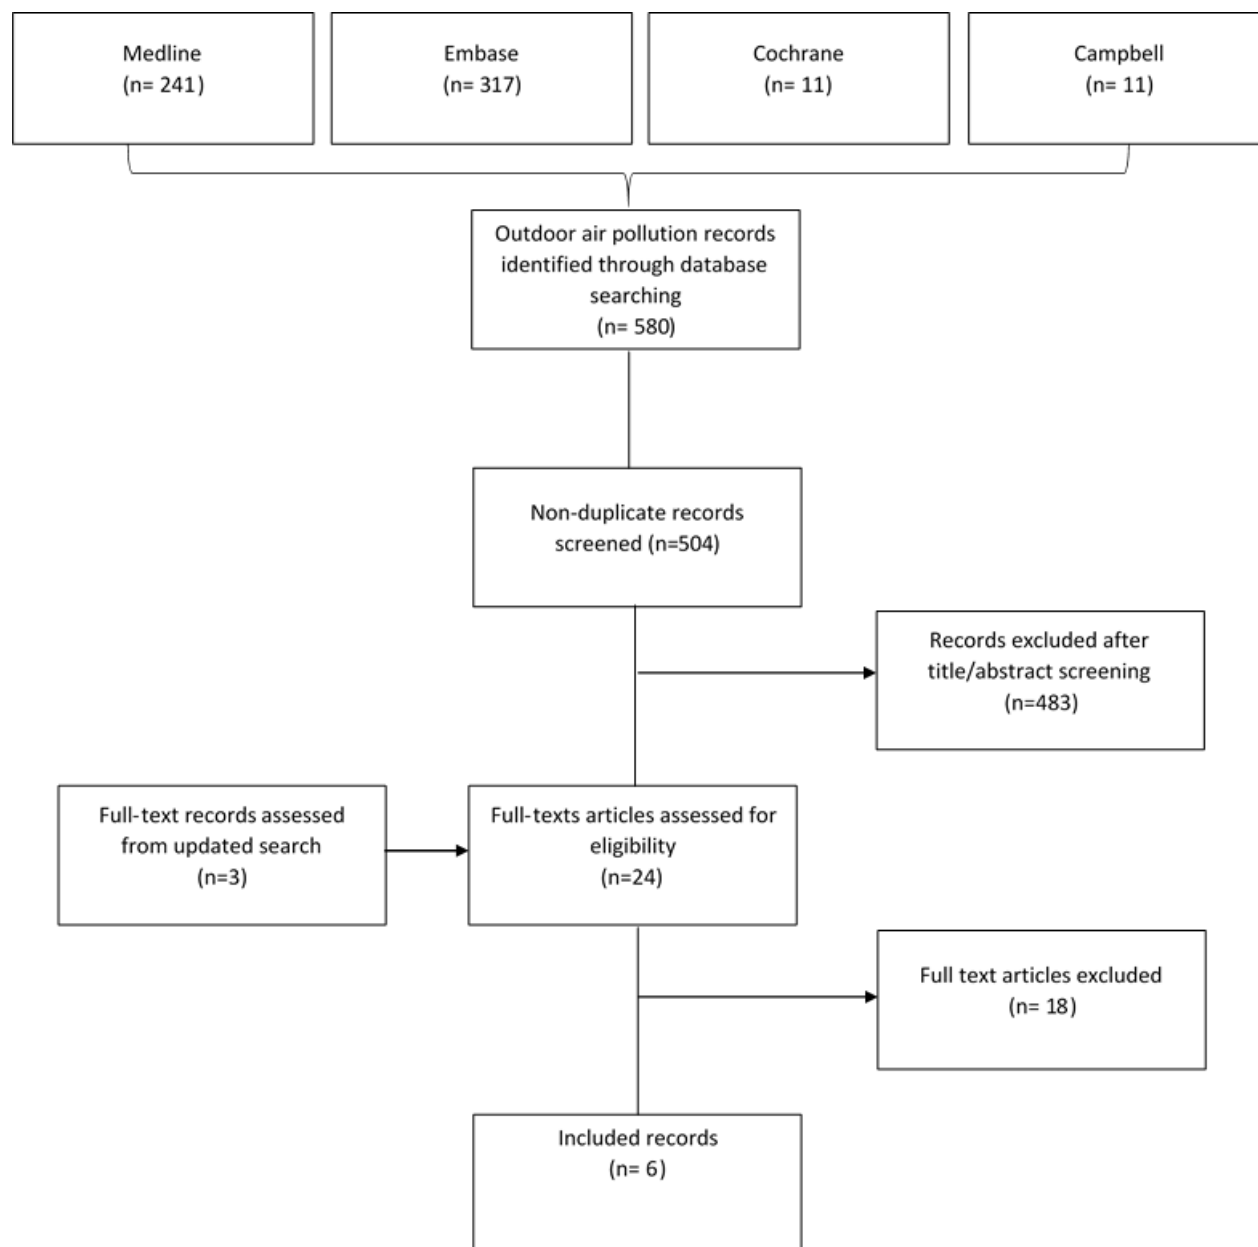

## Indoor air pollution

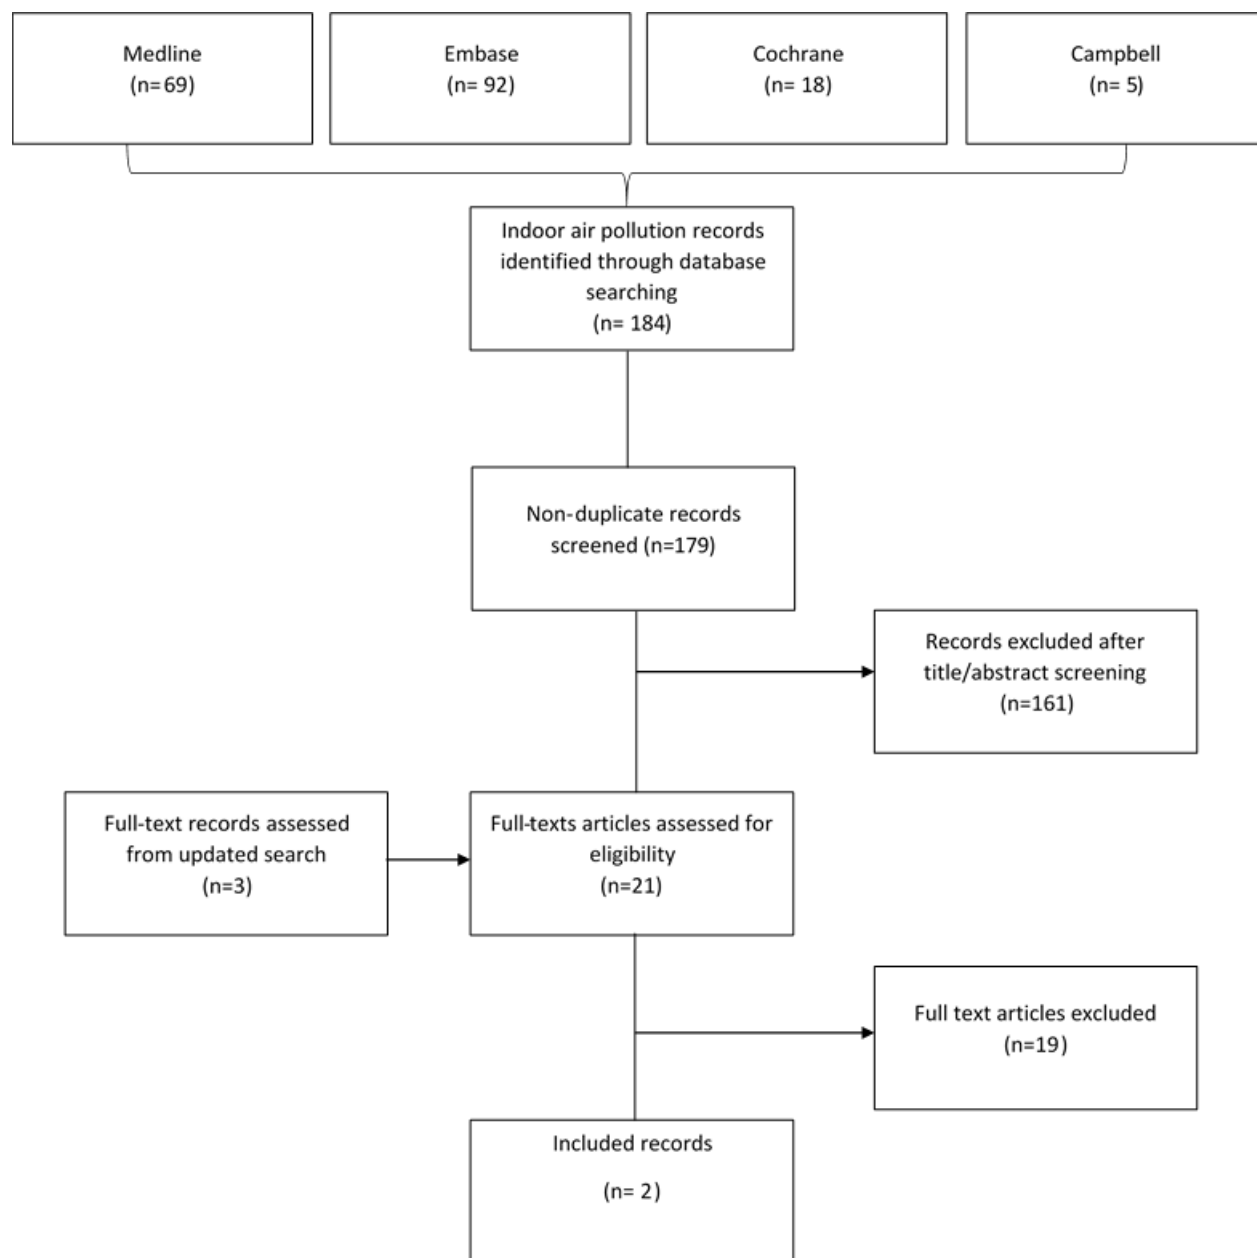

## Environmental Contaminants

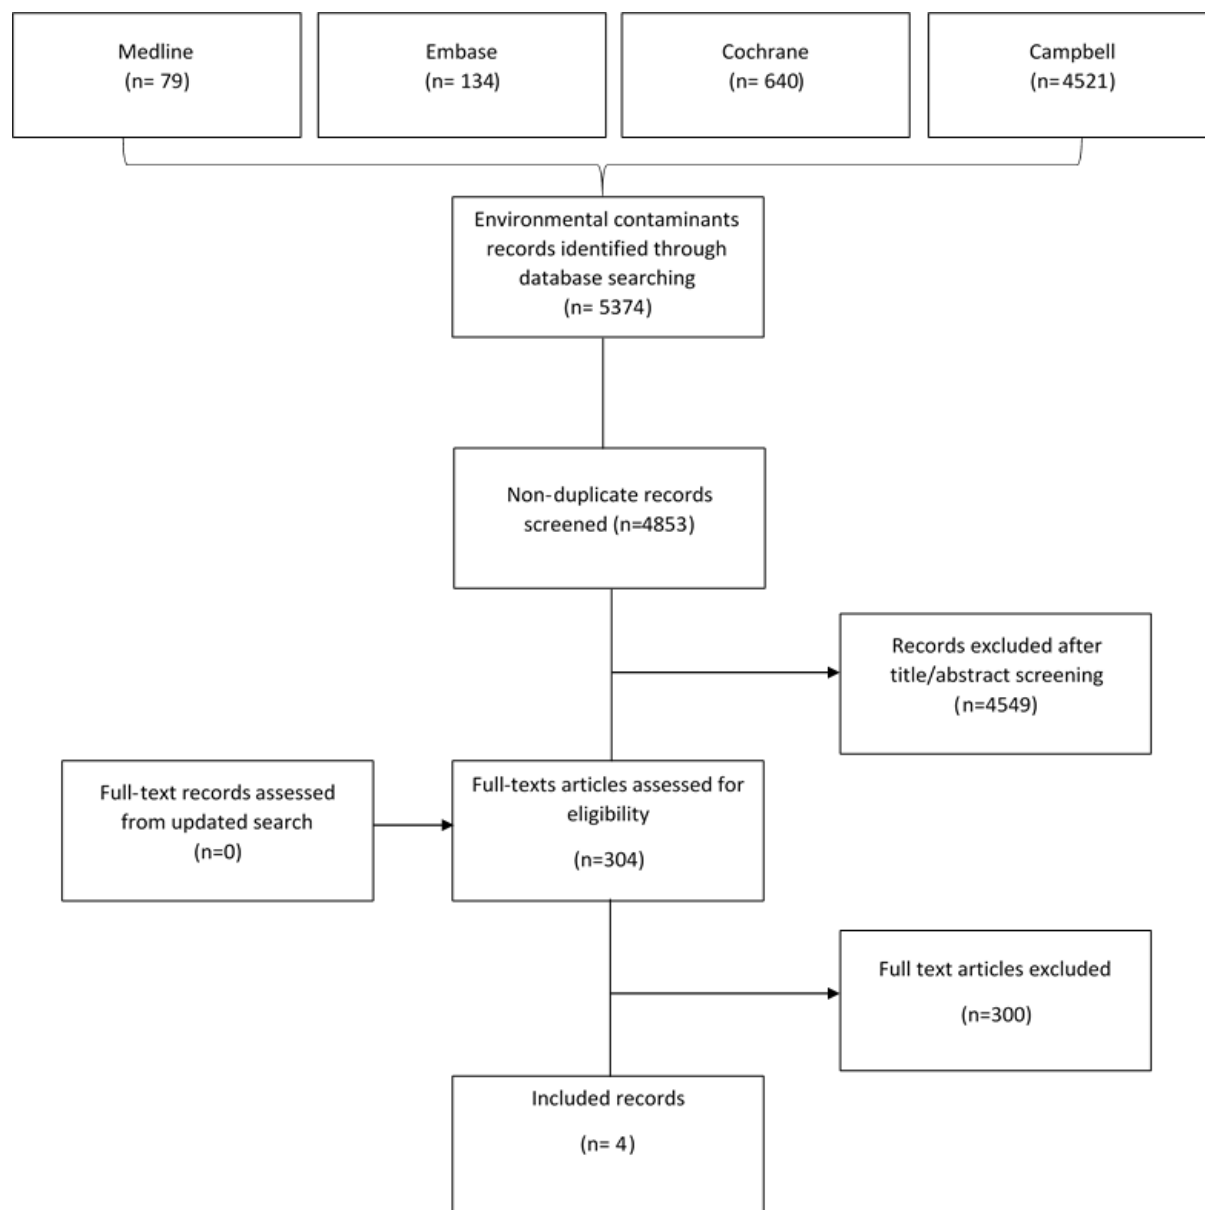



## Appendix G: Forest plots by condition, demonstrating effectiveness of interventions on select outcomes.

Supplementary Figure 1. Pulmonary function in asthma patients and the standard mean difference observed as a result of various interventions. All three intervention types show improvement in pulmonary function.

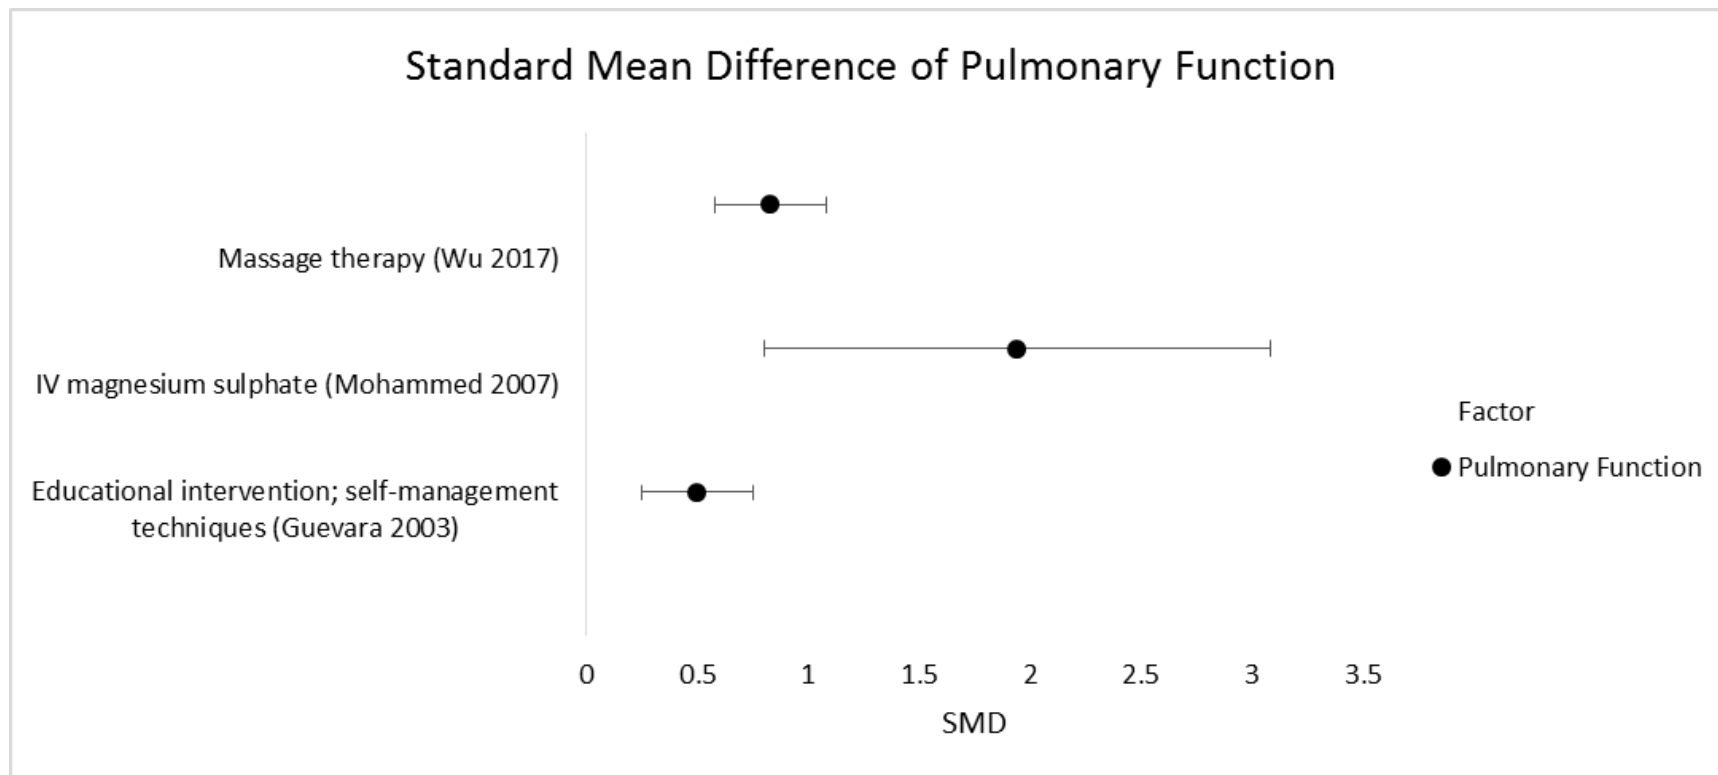

**Supplementary Figure 2. Pulmonary functioned in asthma patients measured as forced expiratory volume (L). Physical therapy showed the greatest impact on forced expiratory volume.**

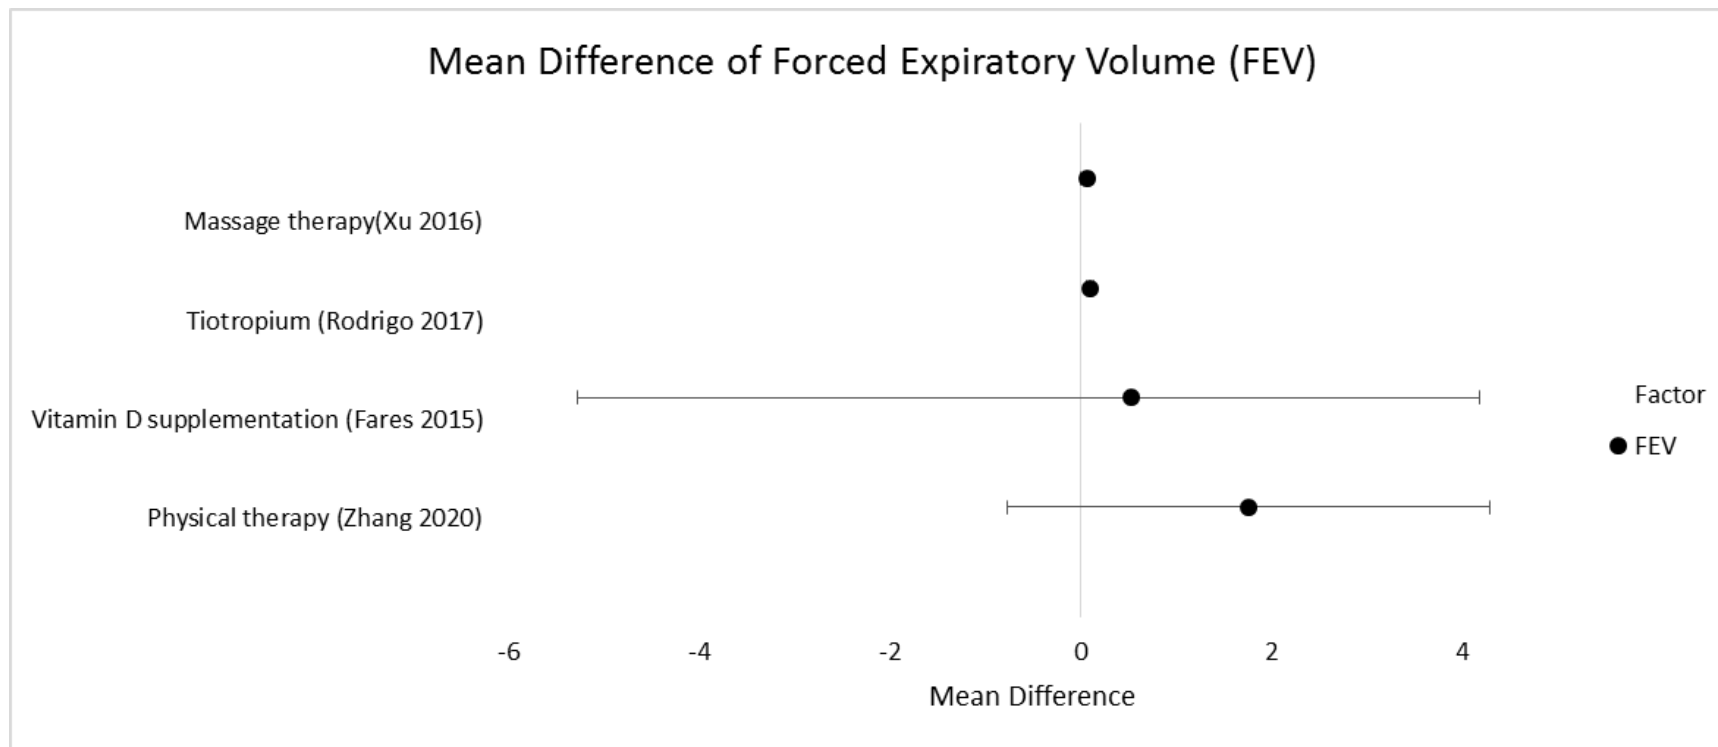

**Supplementary Figure 3. Intervention effectiveness reported as mean difference percent change in HbA1c as a measure of Type 1 Diabetes status. Educational and psychosocial interventions showed the greatest impact on percent change in HbA1c while physical activity interventions had the lowest impact on percent change in HbA1c.**

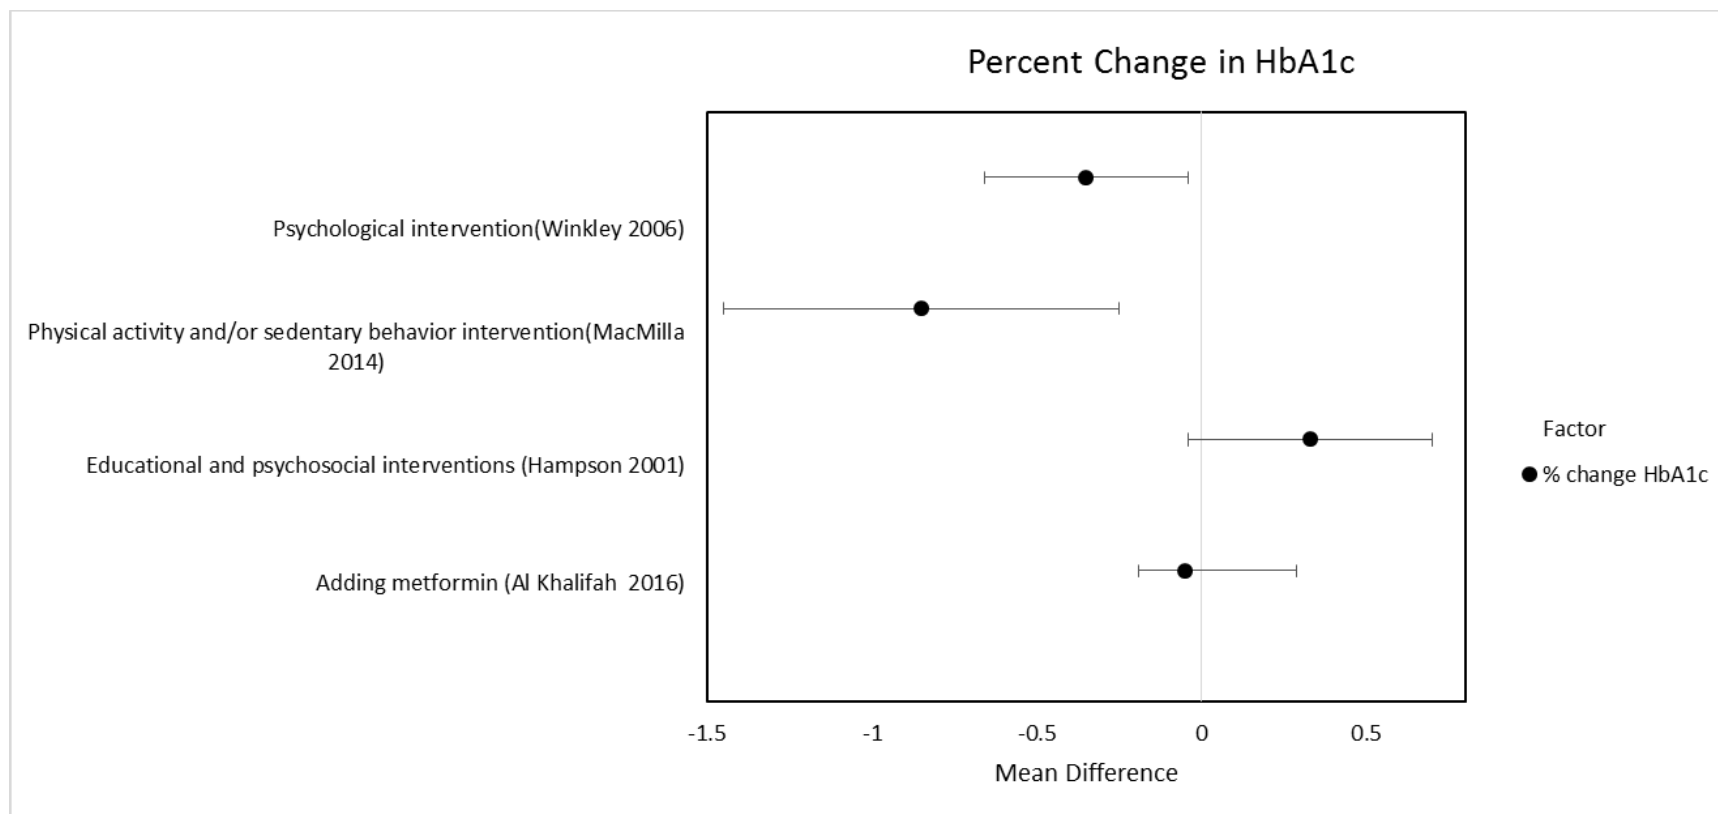

Supplement: peds_2021053852fsupplementarydata.pdf [file peds_2021053852fsupplementarydata.pdf]
